# Supplementary material for: Online cognitive–behavioural therapy for traumatically bereaved people: study protocol for a randomised waitlist-controlled trial
Source: PubMed Central journal article supplement (PMC7473627; doi:10.1136/bmjopen-2019-035050), 2020-09-03
Supplement: bmjopen-2019-035050.draft_revisions.pdf [file bmjopen-2019-035050.draft_revisions.pdf]

# BMJ Open

BMJ Open is committed to open peer review. As part of this commitment we make the peer review history of every article we publish publicly available.

When an article is published we post the peer reviewers' comments and the authors' responses online. We also post the versions of the paper that were used during peer review. These are the versions that the peer review comments apply to.

The versions of the paper that follow are the versions that were submitted during the peer review process. They are not the versions of record or the final published versions. They should not be cited or distributed as the published version of this manuscript.

BMJ Open is an open access journal and the full, final, typeset and author-corrected version of record of the manuscript is available on our site with no access controls, subscription charges or pay-per-view fees (<http://bmjopen.bmj.com>).

If you have any questions on BMJ Open's open peer review process please email [info.bmjopen@bmj.com](mailto:info.bmjopen@bmj.com)

# BMJ Open

## Face-to-face and online cognitive behavioral therapy for traumatically bereaved people: Study protocol for a randomized waitlist controlled trial

|                               |                                                                                                                                                                    |
|-------------------------------|--------------------------------------------------------------------------------------------------------------------------------------------------------------------|
| Journal:                      | <i>BMJ Open</i>                                                                                                                                                    |
| Manuscript ID                 | bmjopen-2019-035050                                                                                                                                                |
| Article Type:                 | Protocol                                                                                                                                                           |
| Date Submitted by the Author: | 16-Oct-2019                                                                                                                                                        |
| Complete List of Authors:     | Lenferink, Lonneke; Rijksuniversiteit Groningen, de Keijser, Jos; Rijksuniversiteit Groningen<br>Eisma, Maarten<br>Smid, Geert<br>Boelen, Paul; Utrecht University |
| Keywords:                     | PSYCHIATRY, Adult psychiatry < PSYCHIATRY, PUBLIC HEALTH                                                                                                           |
|                               |                                                                                                                                                                    |

SCHOLARONE™  
Manuscripts

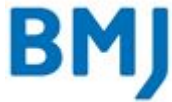

I, the Submitting Author has the right to grant and does grant on behalf of all authors of the Work (as defined in the below author licence), an exclusive licence and/or a non-exclusive licence for contributions from authors who are: i) UK Crown employees; ii) where BMJ has agreed a CC-BY licence shall apply, and/or iii) in accordance with the terms applicable for US Federal Government officers or employees acting as part of their official duties; on a worldwide, perpetual, irrevocable, royalty-free basis to BMJ Publishing Group Ltd ("BMJ") its licensees and where the relevant Journal is co-owned by BMJ to the co-owners of the Journal, to publish the Work in this journal and any other BMJ products and to exploit all rights, as set out in our [licence](#).

The Submitting Author accepts and understands that any supply made under these terms is made by BMJ to the Submitting Author unless you are acting as an employee on behalf of your employer or a postgraduate student of an affiliated institution which is paying any applicable article publishing charge ("APC") for Open Access articles. Where the Submitting Author wishes to make the Work available on an Open Access basis (and intends to pay the relevant APC), the terms of reuse of such Open Access shall be governed by a Creative Commons licence – details of these licences and which [Creative Commons](#) licence will apply to this Work are set out in our licence referred to above.

Other than as permitted in any relevant BMJ Author's Self Archiving Policies, I confirm this Work has not been accepted for publication elsewhere, is not being considered for publication elsewhere and does not duplicate material already published. I confirm all authors consent to publication of this Work and authorise the granting of this licence.

1  
2  
3 **Face-to-face and online cognitive behavioral therapy for traumatically bereaved people:**  
4

5 **Study protocol for a randomized waitlist controlled trial**  
6  
7

8 Lenferink, L.I.M.\*<sup>1,2</sup>, de Keijser, J.<sup>1</sup>, Eisma, M.C.<sup>1</sup>, Smid, G.E.<sup>3,4,5</sup>, & Boelen, P.A.<sup>2,3,4</sup>  
9  
10

11  
12 <sup>1</sup> Department of Clinical Psychology and Experimental Psychopathology, Faculty of  
13 Behavioral and Social Sciences, University of Groningen, Grote Kruisstraat 2/1, 9712 TS  
14 Groningen, The Netherlands. E-mail L.I.M. Lenferink: l.i.m.lenferink@rug.nl.  
15  
16

17  
18  
19  
20 <sup>2</sup> Department of Clinical Psychology, Faculty of Social Sciences, Utrecht University, P.O. Box  
21 80140, 3508 TC, Utrecht, The Netherlands.  
22  
23

24  
25  
26 <sup>3</sup> ARQ National Psychotrauma Centre, Nienoord 5, 1112 XE, Diemen, The Netherlands  
27  
28

29  
30 <sup>4</sup> Foundation Centrum '45, Nienoord 5, 1112 XE Diemen, The Netherlands  
31

32  
33 <sup>5</sup> University of Humanistic Studies, Utrecht, The Netherlands  
34  
35

36 \*Corresponding author  
37  
38  
39  
40  
41  
42  
43  
44  
45  
46  
47  
48  
49  
50  
51  
52  
53  
54  
55  
56  
57  
58  
59  
60

## Abstract

### Introduction

The sudden or violent death of a significant other, such as death due to a traffic accident, can precipitate persistent complex bereavement disorder (PCBD) and comorbid posttraumatic stress disorder (PTSD) and depression. Waitlist controlled trials have shown that grief-specific cognitive behavioral therapy (CBT), delivered face-to-face or online, is an effective treatment for mental health problems. This is the first study that will examine 1) the effectiveness of CBT in a sample exclusively comprised of people bereaved by a traumatic death and 2) the effectiveness of face-to-face CBT (vs. waitlist controls) *and* online CBT (vs. waitlist controls). Our primary hypothesis is that people allocated to the face-to-face or online CBT condition will show larger reductions in PCBD, PTSD, and depression symptom levels post-treatment than people allocated to a waitlist. We further expect that treatment effects are mediated by reductions of negative cognitions and avoidance behaviors and moderated by accident-related stressors. Lastly, the associations between therapeutic alliance and treatment outcomes will be explored.

### Methods and analysis

A three-arm (face-to-face CBT, online CBT, and waiting list) open label parallel randomized controlled trial (RCT) will be conducted. Participants will complete questionnaires at pre-treatment and 12 and 20 weeks after study enrolment. Eligible for participation are Dutch adults who lost a family member, spouse, or friend at least one year earlier due to a traffic accident and report clinically relevant levels of PCBD, and/or PTSD, and/or depression. Multilevel modeling will be used for the main analyses.

## Ethics and dissemination

Ethical approval has been received (METc UMCG:2019.233). If the treatments are demonstrated to be effective, both treatments will be available for future bereaved people. Findings will be disseminated among lay people (e.g., newsletters), our collaborators (e.g., through presenting at non-governmental/(peer-)support organizations), and clinicians and researchers (e.g., (inter)national conferences/journals).

**Keywords:** bereavement; grief; trauma; PTSD; treatment; intervention.

## Strengths and limitations of this study

- This study is the first to examine the effectiveness of face-to-face CBT (vs. waitlist controls) and online CBT (vs. waitlist controls) in reducing psychopathology after traumatic loss in a three-arm RCT.
- This treatment study is one of the first to examine potential moderators and mediators of change in symptom levels after traumatic loss.
- We are not able to statistically test if CBT offered face-to-face or online has equal effects, because limited resources do not allow for recruitment of very large samples.
- Another limitation is the use of self-report questionnaires, instead of diagnostic interviews, to assess symptom levels.

## Trial registration number

NL7497 (Dutch Trial Register)

**Word Count:** 5,017 words including main text

## Introduction

Worldwide, traffic accidents represent the leading cause of unnatural death[1]. Ten to 20% of bereaved people develop severe and persistent grief-related distress, including persistent complex bereavement disorder (PCBD), posttraumatic stress disorder (PTSD), and depression after natural deaths (e.g., illness)[2,3]. Notably, PCBD has been introduced, as other specified psychotrauma- and stressor-related disorder, in the latest version of the Diagnostic and Statistical manual of Mental Diseases (DSM-5)[4]. PCBD is diagnosed if, after the death of a significant other at least 12 months earlier, the person experiences persistent yearning for the deceased and symptoms of reactive distress (e.g., emotional numbness) and social/identity disruption (e.g., feeling alone) causing impairment in daily life. While some PCBD symptoms overlap with PTSD (e.g., anger) and depression symptoms (e.g., sadness), several studies have shown that these three syndromes are distinct[5–7].

Unexpected/violent losses of a significant other, also referred to as a traumatic losses, including deaths caused by traffic accidents, render a risk for developing PCBD, PTSD, and depression[8,9]. The co-occurrence of (symptoms of) these disorders following traumatic loss has also been referred to as “traumatic grief”[10].

### *Increased risk for developing psychopathology after deaths due to traffic accident*

Specific circumstances of losses caused by accidents may account for the elevated risk of traumatic grief. For instance, experiencing multiple losses simultaneously, being a witness to the accident, and juridical and financial consequences are presumed to exacerbate grief-related distress[11]. Furthermore, negative cognitions and avoidance behaviors may mediate the impact of sudden/violent loss on grief, PTSD, and depression levels[12].

According to a cognitive-behavioral model of complicated grief, three interacting malleable

1  
2  
3 processes underlie disturbed grief reactions: i) negative cognitions, ii) avoidance behavior,  
4  
5 and iii) difficulties integrating the loss into the autobiographical knowledge base[13].  
6  
7

8  
9       Experiencing a loss due to a traffic accident may violate basic assumptions about the  
10 world being a safe place[14]. This may fuel negative cognitions (e.g., “I’m less worthy, since  
11 s/he died” and “The death of him/her has taught me that the world is unjust) that may  
12  
13 exacerbate and maintain acute grief responses[15]. Avoidance behaviors include depressive  
14  
15 avoidance and anxious avoidance strategies. Depressive avoidance refers to withdrawal from  
16  
17 social and occupational activities that were perceived as fulfilling before the death, out of  
18  
19 the conviction that these activities are no longer meaningful. Anxious avoidance strategies  
20  
21 serve to prevent confrontation with the reality of the death, out of fear that confrontation is  
22  
23 too painful[13]. One way to avoid confrontation with the reality of the loss, is to focus on  
24  
25 angry thoughts and feelings (e.g., “I was angry at the police, courts, or administration,  
26  
27 because they did not do their work well enough”)[16]. This seems to be a frequently used  
28  
29 avoidant coping strategy in bereaved people after traffic accidents and is strongly related to  
30  
31 PTSD[17]. Difficulty with integration of the loss into the autobiographical knowledge base  
32  
33 refers to the difficulties connecting factual knowledge that the loss is irreversible with  
34  
35 existing information about the self and the relationship with the lost person, stored in  
36  
37 autobiographical memory. Memories related to the loss may lack context in terms of time  
38  
39 and place, causing the loss to be experienced as unreal[18]. It has been argued that this  
40  
41 “sense of unrealness” may trigger intrusive memories and increase feelings of numbness or  
42  
43 shock once the bereaved person is confronted with reminders of the loss[18,19]. The extent  
44  
45 to which a person believes that one is capable of managing stressor-related thoughts,  
46  
47 emotions, and behaviors, also referred to as self-efficacy (e.g., “I can usually handle  
48  
49 whatever comes my way”), has also been determined as an important factor facilitating  
50  
51  
52  
53  
54  
55  
56  
57  
58  
59  
60



1  
2  
3 coping with traumatic stressors[20]. Decreased self-efficacy, negative cognitions and  
4  
5 insufficient integration of the loss may contribute to increased sensitivity to loss reminders  
6  
7 or secondary stressors following traumatic loss[10].  
8  
9

### 10 *Face-to-face cognitive-behavioral therapy for grief-related distress*

11  
12 Grief-specific CBT has, so far, proven to be the most effective treatment for bereaved people  
13  
14 with elevated grief levels[21–24]. CBT targets the above-mentioned cognitive-behavioral  
15  
16 variables with cognitive restructuring, loss-related exposure, and behavioral activation.  
17  
18 Notably, research on putative mechanisms of change of grief-specific CBT is sparse[23] (but  
19  
20 see[25,26]). Focusing on people with traumatic grief is relevant because it would enable  
21  
22 tailoring of interventions to the specific needs of this group, which could improve treatment  
23  
24 outcomes[27].  
25  
26  
27  
28  
29  
30

31  
32 Studies evaluating the effectiveness of CBT-based interventions for people bereaved  
33  
34 by sudden/violent deaths have been conducted earlier, but these were often designed to  
35  
36 target high risk groups irrespective of symptom levels (e.g., people bereaved by suicide[27];  
37  
38 see also:[24]). Since interventions for people without mental health complaints following  
39  
40 loss do not appear to be effective[28], it is critical to specifically examine the effectiveness of  
41  
42 CBT in groups who experience traumatic grief. While some studies did so, these tested the  
43  
44 effectiveness of CBT with additional interventions, such as group interventions or eye  
45  
46 movement desensitization and reprocessing[29,30]. It is therefore yet unclear if application  
47  
48 of CBT in and of itself is effective in reducing psychopathology in people with traumatic grief.  
49  
50  
51  
52  
53

### 54 *Face-to-face and online cognitive behavioral therapy for grief-related distress*

1  
2  
3 Whilst the majority of trials assess the efficacy of face-to-face CBT[24], some online CBT-  
4 based interventions have been developed for distressed bereaved people[31–33]. Offering  
5 CBT through the internet has some potential advantages. It may lower the threshold for  
6 seeking treatment, because it can be delivered independent of geographical location.  
7  
8 Furthermore, asynchronous communication may be used, allowing the client and therapist  
9 can contact each other at any preferred time[34]. This may counter barriers to mental health  
10 service use, such as difficulties with finding help, transportation concerns, or difficulties  
11 scheduling treatment sessions[35]. In addition, online CBT could reduce treatment costs,  
12 improving its accessibility and dissemination for people in need of support[36].  
13  
14

15  
16  
17  
18  
19  
20  
21  
22  
23  
24  
25  
26 A potential downside to online CBT is the high dropout rates found in earlier  
27 studies[36,37]. It has been argued that a strong therapeutic alliance might support  
28 adherence to online treatment and mediates treatment effects [38]. Therapeutic alliance is  
29 defined as a positive emotional bond between client and therapist, whereby both parties  
30 agree on the tasks and goals of the treatment[39]. A good client-therapist relationship might  
31 also explain why guided are more effective than unguided online treatments[34]. Concerns  
32 have been raised that developing a therapeutic relationship might be more difficult when  
33 non-verbal communication is absent[40]. Studies in non-bereaved samples indicate that  
34 developing a strong therapeutic alliance is possible during online treatment[36], and this has  
35 been found to be related to online treatment outcomes[41], but see Andersson and Titov  
36 (2014). More research is needed to further examine the potential differences in quality of  
37 client-therapist relationship between face-to-face and online CBT and its relationship with  
38 treatment outcomes.  
39  
40  
41  
42  
43  
44  
45  
46  
47  
48  
49  
50  
51  
52  
53  
54  
55  
56  
57

58 *Study objectives*  
59  
60

1  
2  
3 Our first aim is to examine the effectiveness of face-to-face CBT (vs. a waiting list control  
4 condition) and online CBT (vs. a waiting list control condition) in reducing symptom levels of  
5  
6 PCBD, PTSD, and depression in people bereaved by a traffic accident. We expect that  
7  
8 participants assigned to the face-to-face and the online CBT conditions will show larger  
9  
10 reductions in symptom levels of PCBD, PTSD, and depression compared with waitlist controls  
11  
12  
13 at post-treatment assessments (Hypothesis 1).  
14  
15  
16

17  
18 Our second aim is to explore potential mediators of therapeutic effects. Based on  
19  
20 prior research and theorizing[13,17,20], we expect that reductions in negative cognitions,  
21  
22 avoidance behaviors, state anger, a sense of unrealness, and improvement in self-efficacy  
23  
24 mediate the positive effects of face-to-face (vs. waiting list controls) and online CBT (vs.  
25  
26 waiting list controls) (Hypothesis 2a). In addition, our aim is to explore whether background  
27  
28 characteristics (i.e., gender, age, and educational level, kinship to the deceased, and time  
29  
30 since loss) and accident-related stressors (i.e., single vs. multiple loss, witnessed the  
31  
32 accident, and involvement in legal trial) moderate treatment effects (Hypothesis 2b). We  
33  
34 have no specific expectations regarding these associations because prior treatment studies  
35  
36 in bereaved people showed inconsistent results[24,25,30]. However, based on clinical  
37  
38 experience, we expect that accident-related stressors will moderate treatment effects, such  
39  
40 that multiple loss, witnessing the accident, and involvement in legal trial negatively impact  
41  
42 treatment effects.  
43  
44  
45  
46  
47  
48  
49

50  
51 Our third aim is to explore i) potential differences between the face-to-face and  
52  
53 online CBT condition in therapeutic alliance (as perceived by the participant and therapist)  
54  
55 and (ii) the associations between quality of the therapeutic alliance and treatment  
56  
57  
58  
59  
60

1  
2  
3 outcomes. Because prior research findings in this area are not equivocal[36,41], no specific  
4  
5 hypotheses were formulated.  
6  
7  
8  
9  
10  
11  
12  
13  
14  
15  
16  
17  
18  
19  
20  
21  
22  
23  
24  
25  
26  
27  
28  
29  
30  
31  
32  
33  
34  
35  
36  
37  
38  
39  
40  
41  
42  
43  
44  
45  
46  
47  
48  
49  
50  
51  
52  
53  
54  
55  
56  
57  
58  
59  
60

For peer review only

## Methods and analysis

### Design

A three-arm (face-to-face CBT, online CBT, and waiting list) multi-centre open label parallel RCT will be conducted in the Netherlands. Randomization will take place after the participant is screened for eligibility-based inclusion criteria (described below). A random number generator ([www.random.org](http://www.random.org)) will be used by a blinded independent researcher, to perform the blocking randomization procedure. An allocation ratio of 1:1:1 will be applied.

Participants allocated to the face-to-face or online CBT condition receive treatment within one week after allocation. All participants will be asked to fill in questionnaires (described below) at baseline (T1), 12 weeks post-allocation (T2), and 20 weeks post-allocation (T3). For participants in the waiting list control group, T3 is at the end of the 20-week waiting period after which they will be randomly allocated to receive face-to-face or online CBT (see Figure 1). A waiting list control group (instead of a no treatment control group) is included to increase the likelihood of participation by guaranteeing that all participants receive treatment. Furthermore, the inclusion of a waiting list control group allows a treatment versus no treatment comparison, that will provide knowledge about the effects of treatment relative to natural recovery from loss. We chose to randomly allocate waitlist controls to face-to-face or online CBT after the 20-week waiting period to maximize the sample size needed for the third research aim.

In line with prior treatment studies from our research group[30,42], the face-to-face CBT is carried out at the institution or private practices of licensed and registered psychologists who are a member of our Traumatic Loss Network (i.e., informal national network of trauma and grief therapists that are involved in research projects of our research

group). All psychologists will receive an 8-hour training about the treatment protocol of this intervention study. The personalized therapist feedback in the online CBT will also be provided by members of the Traumatic Loss Network. The treatment costs in both conditions will be reimbursed.

**Figure 1.** RCT design

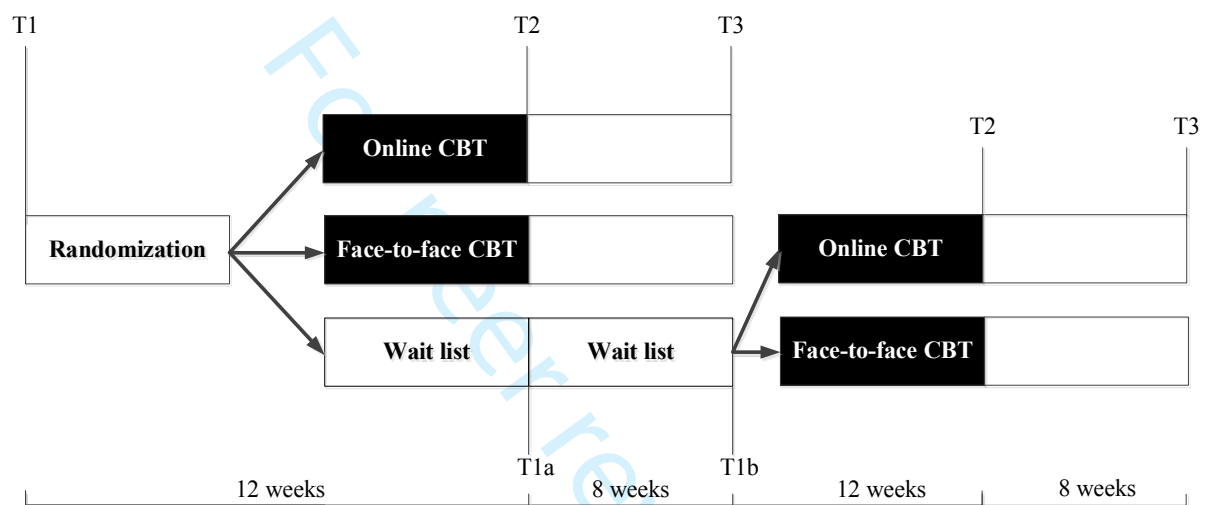

Note. CBT = cognitive-behavioral therapy

## Participants

This RCT is part of a larger on-going research project (so termed "TrafVic-project") examining the psychological impact of, and care after, the death of a significant other due to a traffic accident. We expect to recruit the majority of the participants via a survey-study that has started in December 2018 that included the following question: "In this study we would like to offer psychological help to persons who experience emotional problems. May we approach you with more information about this offer, if your answers to this questionnaire imply that you may experience emotional problems?" People who answered 'yes' will receive a letter with information about the intervention, the treatment study, and an informed consent form. A website ([www.rouwnaverkeersongeval.nl](http://www.rouwnaverkeersongeval.nl)) has been developed so

1  
2  
3 that potential participants can read information about the research and treatments. People  
4  
5 who are interested can also sign up for the study via this website. Recruitment for this RCT  
6  
7 had not started at the time of submission of this manuscript.  
8  
9

10  
11 To be eligible for study participation, the person must 1) be a family member,  
12  
13 spouse, or friend of a person who died due to a traffic accident at least one year earlier, 2)  
14  
15 be  $\geq 18$  years of age, and 3) meet DSM-5 criteria for PCBD and/or PTSD and/or experience  
16  
17 clinically relevant depression, based on questionnaire scores (see below for more details).  
18  
19 People are excluded when they: 1) do not master the Dutch language, 2) do not have access  
20  
21 to Internet, 3) suffer from a substance use disorder, psychotic disorder, intellectual  
22  
23 disability, and/or suicidality based on clinical judgment at the intake.  
24  
25  
26  
27  
28

### 29 **Sample size**

30  
31  
32 To test our primary hypothesis (Hypothesis 1), two tests for each outcome separately (PCBD,  
33  
34 PTSD, and depression) will be conducted, with test 1 examining face-to-face CBT vs. waitlist  
35  
36 controls and test 2 examining online CBT vs. waitlist controls. To find a difference between  
37  
38 controls and test 2 examining online CBT vs. waitlist controls. To find a difference between  
39  
40 two groups (face-to-face CBT vs. waitlist controls and online CBT vs. waitlist controls) of at  
41  
42 least a medium effect size ( $f = 0.25$ ; based on prior research[22,30,31]) with a power of 80%,  
43  
44 an  $\alpha$  of 0.017 (corrected for multiple testing, i.e.,  $0.05/3$ , because of three primary outcome  
45  
46 measures (PCBD, PTSD, and depression)), and a strong association ( $r = .50$ ) between the  
47  
48 three repeated measures (T1, T2, and T3), a sample size of 23 per condition is sufficient.  
49  
50 Taking into account an average dropout rate of 19% [22], a total sample size of 82 (69+13) is  
51  
52 required to test Hypothesis 1.  
53  
54  
55  
56

57  
58 Because our data are nested (repeated measures) (level 1) within individuals (level  
59  
60 2), and possibly within families sharing the same household (level 3), multi-level modeling

1  
2  
3 will be performed to test hypothesis 1. Conducting a power analysis within a multi-level  
4  
5 framework is not feasible for various reasons[42]. We therefore conducted the power  
6  
7 analysis for a repeated measures ANOVA.  
8  
9

## 10 **Intervention**

11  
12  
13  
14 CBT will consist of eight sessions offered in within a timeframe of 12 weeks. Eight sessions  
15  
16 have shown to be sufficient to yield clinically relevant effects in prior research[30]. Following  
17  
18 Dutch guidelines for grief-specific CBT[43], central components of the treatment are  
19  
20 exposure, cognitive restructuring, and behavioral activation. In the first session,  
21  
22 psychoeducation is offered, including information about possible emotional reactions to the  
23  
24 death of a loved one in a traffic accident and processes that might foster or hamper  
25  
26 recovery. A rationale for the CBT interventions is provided.  
27  
28  
29  
30  
31

32  
33 Then, session 2, 3, and 4 are focused on exposure; the circumstances and story of the  
34  
35 loss are discussed in detail, and the participant is encouraged to confront stimuli that s/he  
36  
37 tends to avoid. Exposure is conducted by imaginary exposure assignments in session and  
38  
39 after the session by writing assignment that have proven effective in prior research[33].  
40  
41 These writing assignments are focused on writing a detailed narrative of the loss and its  
42  
43 circumstances.  
44  
45  
46  
47

48  
49 The next sessions (5 and 6) focus on identifying and changing negative cognitions  
50  
51 that hamper adjustment (i.e., cognitive restructuring); specific attention is paid to cognitions  
52  
53 connected with responsibility/guilt and anger that may be elevated following the accidental  
54  
55 death[11]. Cognitive restructuring assignments are provided to gain an alternative  
56  
57 perspective on negative thoughts about the self, life, the future, by 1) psycho-education  
58  
59 about common unhelpful thoughts, 2) identifying one's own unhelpful thoughts, and 3)  
60



1  
2  
3 challenging these thoughts. Participants are instructed to undertake these three steps by  
4  
5 writing down each day a description of i) an emotional moment/event, ii) their thoughts  
6  
7 during this event, iii) their feelings (and intensity of these feelings on a scale of 1 through  
8  
9 10), iv) their behavior, v) evaluation of their thoughts), and vi) alternative helpful thoughts.  
10  
11  
12

13  
14 In session 7 and 8, participants are encouraged to reengage in previously valued  
15  
16 social, recreational, and occupational activities in order to facilitate the process of  
17  
18 adjustment. Behavioral activation assignments are focused on writing about valued activities  
19  
20 and making plans to achieve valued goals. Session 8 is also focused on what the participant  
21  
22 has learned and how to deal with difficulties in the future.  
23  
24  
25

26  
27 Online CBT uses the same interventions with the same goals, yet with all information  
28  
29 and assignments being presented in an online framework, offered via a secure website. As in  
30  
31 the face-to-face CBT, exposure, cognitive restructuring, and behavioral activation are  
32  
33 central. Instead of information being exchanged interactively between the therapist and the  
34  
35 participant, in online CBT, participants listen to a video-therapist verbally sharing  
36  
37 information. Similar to face-to-face CBT, the treatment includes 8 sessions, called lessons.  
38  
39 Participants receive weekly asynchronous written feedback from an online therapist on  
40  
41 assignments that they complete. In both conditions, participants receive written information  
42  
43 — offered in a treatment manual for face-to-face condition and offered online for the online  
44  
45 condition — that consists of psychoeducation, details about the content of the treatment,  
46  
47 and homework assignments. Moreover, in both conditions, participants are encouraged to  
48  
49 ask a significant other to support them during treatment. This support figure is then  
50  
51 informed about the treatment through written information.  
52  
53  
54  
55  
56  
57  
58  
59  
60

1  
2  
3 Treatment adherence for the face-to-face CBT will be monitored by asking the  
4  
5 therapists to report compliances and deviations from the protocol in a journal. Adherence  
6  
7 for the online CBT will be monitored by evaluating log data. Monthly supervision of the  
8  
9 therapists takes place by telephone.  
10  
11  
12

### 13 **Measures**

#### 14 *Primary outcome measures*

15  
16  
17 PCBD is assessed with the Traumatic Grief Inventory-Self Report (TGI-SR)(44). The TGI-SR  
18  
19 consists of 18 items on a 5-point Likert scale ranging from 1 = never through 5 = always. Four  
20  
21 items tapping disturbed grief criteria according to the 11th edition of the International  
22  
23 Classification of Diseases were added(45). An example of an item is: "I found it difficult to  
24  
25 trust others". The instruction of the original questionnaire was altered from referring to "the  
26  
27 death of your loved one" to "the death of your loved one(s) due to a traffic accident".  
28  
29 Psychometric properties of the TGI-SR are adequate(44,46). Participants are considered as  
30  
31 meeting criteria for DSM-5 PCBD(4) when they score at least 3 ("Sometimes") on at least 1  
32  
33 criterion B symptom (Item 1, item 2, item 3, and item 14), at least 6 criterion C symptoms  
34  
35 (item 4 up to 11, and item 15 up to 18), and the criterion D symptom (item 13).  
36  
37  
38  
39  
40  
41  
42  
43  
44

45 PTSD symptoms are assessed with the PTSD Checklist for DSM-5 (PCL-5)(47) (Dutch  
46  
47 version: (48)). Participants rate how often they were bothered by each symptom (e.g., "In  
48  
49 the past month, how much were you bothered by trouble remembering important parts of  
50  
51 the accident?") on 5-point Likert scales (0 = not at all and 4 = extremely). The instruction and  
52  
53 the items of the original questionnaire are altered from referring to the "stressful event" to  
54  
55 the "the death of your loved one(s) due to a traffic accident". The PCL-5 has shown to be  
56  
57 reliable and valid(47). Participants meet the criteria for DSM-5 PTSD(4) when they score at  
58  
59  
60

1  
2  
3 least 2 ("Moderately") on 1 criterion B item (items 1-5), 1 criterion C item (items 6-7), 2  
4  
5  
6 criterion D items (items 8-14), and 2 criterion E items (items 15-20).  
7

8  
9 Depression symptom are assessed with the depression subscale of the HADS-D(49).  
10  
11 The HADS-D consists of 7 items (e.g., "I still enjoy the thing I used to do") rated on 4-point  
12  
13 scores ranging from 0 (e.g., "Hardly at all") through 3 (e.g., "Definitely as much"). The Dutch  
14  
15 HADS-D is a reliable and valid screening tool for depression(50). A cut-off score of  $\geq 8$  is used  
16  
17 as indicator for clinically relevant depression(49).  
18  
19

### 20 21 22 *Secondary outcome measures*

23  
24  
25 Impairments in daily functioning is measured with the 5-item Work and Social  
26  
27 Adjustment Scale (WSAS)[51] (Dutch version:[52]). Participants rate, on 9-point Likert scales  
28  
29 (0 = not at all to 8 = extremely), how much they are currently impaired in, for instance work,  
30  
31 because of the death of their loved one(s) due to a traffic accident. The WSAS demonstrated  
32  
33 good reliability and validity[51].  
34  
35

36  
37  
38 Negative grief-related cognitions are assessed with 18 items from the Grief  
39  
40 Cognitions Questionnaire (GCQ)[15]. Participants are asked to rate their agreement with  
41  
42 each item (e.g., "Since [-] is dead, I feel less worthy") on 6-point scales varying from 0 =  
43  
44 disagree strongly through 5 = agree strongly. The psychometric properties have been  
45  
46 positively evaluated in prior research[15].  
47  
48  
49

50  
51 Avoidance is measured with the Depressive and Anxious Avoidance in Prolonged  
52  
53 Grief Questionnaire (DAAPGQ)[53]. The depressive avoidance subscale consists of 5 items  
54  
55 (e.g. 'Since [-] is dead, I do much less of the things that I used to enjoy.') and the anxious  
56  
57 avoidance subscale consists of 4 items (e.g., 'I avoid to dwell on painful thoughts and  
58  
59  
60

1  
2  
3 memories connected to his/her death.’). Participants answer each item on an 8-point scale  
4  
5 with 0 = not at all true for me, and 7 = completely true for me. The DAAPGQ has adequate  
6  
7 psychometric properties[53].  
8  
9

10  
11 State anger is assessed with the 15-item state anger subscale of the State-Trait Anger  
12  
13 Expression Inventory-2 (STAXI-2)[54] (Dutch version:[55]). Participants are asked to rate on  
14  
15 4-point Likert scales (1 = not at all and 4 = extremely) how angry they feel right now (e.g., “I  
16  
17 feel annoyed”). The STAXI-2 is a valid and reliable measure to assess state anger[55].  
18  
19

20  
21 A sense of unrealness is measured with the 5-item Experienced Unrealness Scale[18].  
22  
23 Participants are asked to rate their agreement with each item (e.g., “I still can hardly imagine  
24  
25 that [-] will never be here again”) on 8-point scales (0 = not at all true for me 7 = completely  
26  
27 true for me). This instrument demonstrated adequate psychometric properties[18].  
28  
29

30  
31 Self-efficacy is assessed with the General Self-Efficacy Scale (GSES)[56]. The GSES is a  
32  
33 10-item measure. Participants are asked to rate their agreement with each item (e.g., “I can  
34  
35 solve most problems if I invest the necessary effort.”) on a 4-point scales (1 = completely not  
36  
37 true, 4 = completely true). The GSES has shown excellent reliability and validity[56].  
38  
39

40  
41 Quality of the therapeutic alliance is measured with the 12-item Work Alliance  
42  
43 Inventory-Short Form, Client Version and Therapist Version at session 4 (WAI-SF)[57] (Dutch  
44  
45 version:[58]. The WAI-SF consists of 12 items (e.g., Client version: “We agree on what is  
46  
47 important for me to work on”, Therapist Version: “We are working towards mutually agreed  
48  
49 upon goals.”) on 5-point scales (1 = never and 5 = always). Higher total scores indicate a  
50  
51 higher quality of the therapeutic alliance as perceived by the participant and therapist. The  
52  
53 WAI-SF is a reliable and valid assessment tool[59].  
54  
55  
56  
57  
58  
59  
60

### *Other measures*

Participants are allowed to receive other forms of psychosocial support during participation in the trial. Based on a single question we will assess whether the participants received other forms of psychosocial professional support in order to consider this in our analyses. The following question will be used: “During the past 12 weeks/8 weeks (for T2 and T3, respectively) did you receive additional psychological professional support from a psychologist, therapist or psychiatrist other than the (on-line) therapist from the TrafVic-study?” Other forms of support (for example instrumental and legal support) and the use of (psychotropic) medications are also allowed for every participant.

### **Statistical analyses**

To examine the differences in reductions of symptom levels of PCBD, PTSD, and depression from pre- to post-treatment between the conditions (face-to-face CBT, online CBT, and waitlist), six independent multi-level models will be built (Hypothesis 1). Symptom levels of PCBD, PTSD, and depression will consecutively be included as dependent variables and condition (face-to-face CBT vs waitlist controls or online CBT vs. waitlist controls), time, and time x condition (interaction term) as predictor variables, taking into account that repeated observations (level 1) are nested within individuals (level 2), and within households (level 3; if applicable). Additionally, relevant background, loss-related variables, and use of co-interventions (yes/no) during participation in our study, will be included in the analysis as covariates. Deviance tests will be used to examine whether inclusion of these covariates improves model fit[60].

To test hypothesis 2a, mediation analyses will be conducted for the dependent variables that show a significant time x condition interaction effect. Each possible mediator

1  
2  
3 (i.e., negative cognitions, avoidance behavior, state anger, a sense of unrealness, and self-  
4  
5 efficacy) will be included in the model separately. Multiple mediation models will not be  
6  
7 examined, due to an anticipated lack of power. Scores at three measurement occasions (T1,  
8  
9 T2, and T3 for the face-to-face and online CBT and T1, T1a, and T1b for the wait list controls)  
10  
11 for the mediator and dependent variable will be taken into account in one structural  
12  
13 equation model following recommendations from Little[61].  
14  
15  
16  
17

18  
19 To achieve research aim 2b, multilevel analyses will be used to examine to what  
20  
21 extent treatment effects on PCBD, PTSD, and depression levels are moderated by  
22  
23 background characteristics, including gender (man vs. woman), age (in years), and  
24  
25 educational level (low vs. high), kinship to the deceased (child/spouse vs. other), and time  
26  
27 since loss (in years), and b) accident-related stressors, including number of losses (single vs.  
28  
29 multiple), witnessing the accident (no vs. yes), and involvement in legal trial (no vs. yes).  
30  
31 Each possible moderator will be added to the model by including it as a predictor and as  
32  
33 interaction term (e.g., time x condition x gender).  
34  
35  
36  
37  
38

39 For examination of the third research aim, T-tests will be used to explore to what  
40  
41 extent therapeutic alliance (total and subscale scores) differ between conditions (face-to-face  
42  
43 vs. online CBT). Lastly, therapeutic alliance scores will be added as predictor in multilevel  
44  
45 models to examine to what extent it interacts (i.e., time x condition x therapeutic alliance)  
46  
47 with treatment outcomes. Data of all participants entering the study will be included in all  
48  
49 analyses (i.e., intention-to-treat analysis).  
50  
51  
52  
53

#### 54 **Ethics and dissemination**

55  
56  
57 This study has been approved by a local ethics committee (METc UMCG: ID number:  
58  
59 2019.233). The study will be conducted according to the principles of the Declaration of  
60

1  
2  
3 Helsinki (8th version, 2013) and in accordance with the Medical Research Involving Human  
4  
5 Subjects Act. Collected data will be handled confidentially, according to the EU General Data  
6  
7 Protection Regulation and the Dutch Act on Implementation of the General Data Protection  
8  
9 Regulation. Unidentifiable data from this trial will be stored in data repositories from the  
10  
11 University of Groningen and Utrecht University.  
12  
13  
14  
15

16 Findings of this RCT will be disseminated among participants by means of a  
17  
18 newsletter. If shown to be effective, the treatment will be accessible for future bereaved  
19  
20 people because, as a result of this study, 1) a nationwide network of therapists are trained in  
21  
22 our protocol for the face-to-face treatment, and 2) because the online framework will be  
23  
24 made publicly accessible. Findings will also be disseminated among lay people by uploading  
25  
26 the newsletters on our website ([www.rouwnaverkeersongeval.nl](http://www.rouwnaverkeersongeval.nl)) and through media  
27  
28 performances. Our findings will be presented to our collaborators, including non-  
29  
30 governmental organizations and (peer-)support organizations for bereaved people.  
31  
32 Treatment materials are available online for free (see  
33  
34 [www.rouwnaverkeersongeval.nl/downloads](http://www.rouwnaverkeersongeval.nl/downloads)). Lastly, colleagues will be informed about our  
35  
36 findings during presentations at (inter)national conferences and by articles in scientific  
37  
38 journals.  
39  
40  
41  
42  
43  
44  
45  
46  
47  
48  
49  
50  
51  
52  
53  
54  
55  
56  
57  
58  
59  
60

## Discussion

The relatively few RCTs among general bereaved people with elevated grief levels indicate that grief-specific CBT-based interventions delivered face-to-face or online yield the largest effects on post-loss mental health compared with a waiting list[21–24]. RCTs evaluating treatment effects for people with elevated mental health complaints after confrontation with sudden/violent losses are lacking, with one notable exception that compared EMDR plus CBT vs. wait list controls[30]. Given that traumatically bereaved people are most strongly at risk for PCBD and comorbid PTSD and depression[8], it seems particularly relevant to develop evidence-based interventions for this population.

This will be the first RCT to examine the effectiveness of CBT in a sample exclusively comprised of people exposed to a traumatic death. Furthermore, the effectiveness of face-to-face *and* online grief-specific CBT (vs. waitlist controls) will be examined for the first time in one trial. We are not able to test whether face-to-face and online CBT has equal effects. A non-inferiority trial would require a sample size of over 1000 people[62], which is not feasible given our resources. Nonetheless, the findings are expected to yield important insights in the effects of online CBT (vs. waitlist controls) relative to the effects of face-to-face CBT (vs. waitlist controls). Unlike prior studies, our study design enables a fair, albeit indirect comparison of face-to-face and online grief treatment. For instance, in this RCT the treatment conditions are designed to be as similar as possible in terms of treatment content, treatment duration, experience and training of therapists, outcome measures, and characteristics of study participants. When we find similar effect sizes for between group comparisons (face-to-face CBT vs. waiting list and online CBT vs. waiting list), CBT delivered online can be considered as supplement for or complementary to face-to-face treatment,



1  
2  
3 because it potentially overcomes drawbacks of face-to-face treatment, such as waiting lists  
4  
5 and travel expenses.  
6  
7

8  
9 We will also examine potential mediators and moderators of change. Findings from  
10  
11 mediation analyses, examining the role of among others negative cognitions and avoidance  
12  
13 behaviors, will provide insights in potential underlying therapeutic processes to foster  
14  
15 recovery from traumatic loss. These insights are deemed important to design treatments  
16  
17 that more effectively target these mechanisms of change. Findings from the moderator  
18  
19 analyses are expected to improve our knowledge on for whom (e.g., women or people who  
20  
21 are more remotely bereaved) this grief-CBT works best. Findings on potential mediators and  
22  
23 moderators of change are necessary to improve treatments given that a maximum of 42% of  
24  
25 bereaved people report clinically relevant reductions in grief levels after treatment[21,23].  
26  
27  
28  
29

30  
31 Lastly, the role of therapeutic alliance on therapy outcomes will be explored. Prior  
32  
33 research in bereaved people has shown that greater therapeutic alliance, from the  
34  
35 perspective of the client, at week 4 of a face-to-face grief-specific treatment, was related to  
36  
37 greater reductions in grief levels. This therapeutic alliance-grief relationship was not  
38  
39 significant for non-grief specific treatment[63]. Our exploration of this association, from the  
40  
41 perspective of client *and* therapist, may for the first time shed light on (similarities or  
42  
43 differences in) success rates of face-to-face and online CBT for traumatic grief.  
44  
45  
46  
47  
48

49 An anticipated limitation of our RCT is the self-selected sample. It is possible that  
50  
51 people who are more open towards innovative technology in general[64] and received  
52  
53 support prior to the loss[35] are more likely to sign up for this study, limiting the  
54  
55 generalization of findings emerging from this study. Furthermore, we will use self-report  
56  
57 measures instead of diagnostic interviews, which may increase the risk of overestimating  
58  
59  
60

1  
2  
3 symptom levels[65]. Another limitation of this trial may relate to the fact that the  
4  
5 operationalization and assessment of grief as a disorder is still under debate[66–68]. For  
6  
7 instance, PCBD, included as “condition for further study” in the DSM-5, is likely to be  
8  
9 changed in a revision of the DSM. To maximize diagnostic compatibility, we added four  
10  
11 items, corresponding to ICD-11 PGD criteria, to the TGI-SR, enabling operationalization of our  
12  
13 primary outcome measure in terms of diagnoses of pathological grief according to both  
14  
15 DSM-5 and ICD-11.  
16  
17  
18  
19  
20

21 To conclude, this RCT will provide new insights in effectiveness of face-to-face and  
22  
23 online CBT for bereaved people after traffic accidents with clinically relevant distress as well  
24  
25 as in mediators and moderators of therapeutic change. As trials to date have primarily  
26  
27 focused on effects of face-to-face treatment for non-traumatically bereaved people, our  
28  
29 findings are expected to provide a valuable addition to the knowledge base on treating  
30  
31 severely distressed bereaved people.  
32  
33  
34  
35  
36  
37  
38  
39  
40  
41  
42  
43  
44  
45  
46  
47  
48  
49  
50  
51  
52  
53  
54  
55  
56  
57  
58  
59  
60

## References

- 1 World Health Organization. The top 10 causes of death [Internet]. 2019 [accessed on  
2  
3  
4  
5  
6  
7  
8  
9  
10  
11  
12  
13  
14  
15  
16  
17  
18  
19  
20  
21  
22  
23  
24  
25  
26  
27  
28  
29  
30  
31  
32  
33  
34  
35  
36  
37  
38  
39  
40  
41  
42  
43  
44  
45  
46  
47  
48  
49  
50  
51  
52  
53  
54  
55  
56  
57  
58  
59  
60  
October 14 2019]. Available from: <https://www.who.int/news-room/fact-sheets/detail/the-top-10-causes-of-death>
- 2 Lundorff M, Holmgren H, Zachariae R, et al. Prevalence of prolonged grief disorder in adult bereavement: A systematic review and meta-analysis. *J Affect Disord.* 2017;212:138–49.
- 3 Onrust SA, Cuijpers P. Mood and anxiety disorders in widowhood: a systematic review. *Aging Ment Health.* 2006;10(4):327–34.
- 4 American Psychiatric Association. Diagnostic and statistical manual of mental disorders (5th ed.). Arlington, VA: American Psychiatric Publishing; 2013.
- 5 Boelen PA, van de Schoot R, van den Hout MA, et al. Prolonged Grief Disorder, depression, and posttraumatic stress disorder are distinguishable syndromes. *J Affect Disord.* 2010;125(1–3):374–8.
- 6 Lenferink LIM, Nickerson A, de Keijser J, et al. Trajectories of grief, depression, and posttraumatic stress in disaster-bereaved people. *Depress Anxiety.* 2018.
- 7 Malgaroli M, Maccallum F, Bonanno GA. Symptoms of persistent complex bereavement disorder, depression, and PTSD in a conjugally bereaved sample: a network analysis. *Psychol Med.* 2018;48(14):2439–48.

- 1  
2  
3 8 Heeke C, Kampisiou C, Niemeyer H, et al. A systematic review and meta-analysis of  
4  
5 correlates of prolonged grief disorder in adults exposed to violent loss. *Eur J*  
6  
7 *Psychotraumatology*. 2019;10(1).  
8  
9  
10  
11 9 Kristensen P, Weisæth L, Heir T. Bereavement and mental health after sudden and violent  
12  
13 losses: a review. *Psychiatry*. 2012;75(1):76–97.  
14  
15  
16  
17 10 Smid GE, Kleber RJ, Rie SM de la, et al. Brief Eclectic Psychotherapy for Traumatic Grief  
18  
19 (BEP-TG): toward integrated treatment of symptoms related to traumatic loss. *Eur J*  
20  
21 *Psychotraumatology*. 2015;6(1):27324.  
22  
23  
24  
25 11 Eisma, M.C., de Keijser, J. Nabestaanden van verkeersongevallen. In: de Keijser, J., Boelen,  
26  
27 P.A., Smid, G.E., redacteuren. Handboek traumatische rouw. Amsterdam: Uitgeverij  
28  
29 Boom; 2018. p. 104–16.  
30  
31  
32  
33 12 Boelen PA, de Keijser J, Smid G. Cognitive–behavioral variables mediate the impact of  
34  
35 violent loss on post-loss psychopathology. *Psychol Trauma Theory Res Pract Policy*.  
36  
37 2015;7(4):382–90.  
38  
39  
40  
41 13 Boelen PA, van den Hout MA, van den Bout J. A Cognitive-Behavioral Conceptualization of  
42  
43 Complicated Grief. *Clin Psychol Sci Pract*. 2006;13(2):109–28.  
44  
45  
46  
47 14 Janoff-Bulman R. Assumptive worlds and the stress of traumatic events: Applications of  
48  
49 the schema construct. *Soc Cogn*. 1989;7(2):113–36.  
50  
51  
52  
53 15 Boelen PA, Lensvelt-Mulders GJLM. Psychometric Properties of the Grief Cognitions  
54  
55 Questionnaire (GCQ). *J Psychopathol Behav Assess*. 2005;27(4):291–303.  
56  
57  
58  
59  
60

- 1  
2  
3 16 Foa EB, Riggs DS, Massie ED, et al. The impact of fear activation and anger on the efficacy  
4  
5 of exposure treatment for posttraumatic stress disorder. *Behav Ther.* 1995;26(3):487–  
6  
7 99.  
8  
9  
10  
11 17 Tehrani N. Road victim trauma: an investigation of the impact on the injured and  
12  
13 bereaved. *Couns Psychol Q.* 2004;17(4):361–73.  
14  
15  
16  
17 18 Boelen PA. A Sense of ‘unrealness’ about the death of a loved-one: An exploratory study  
18  
19 of its role in emotional complications among bereaved individuals. *Appl Cogn Psychol.*  
20  
21 2010;24(2):238–51.  
22  
23  
24  
25 19 Boelen PA. “It feels as if she might return one day”: A sense of unrealness as a predictor  
26  
27 of bereavement-related emotional distress / “Tengo la sensación de que ella puede  
28  
29 volver algún día”: la sensación de irrealidad como un predictor del sufrimiento  
30  
31 emocional relacionado con la pérdida. *Estud Psicol.* 2017;38(3):734–51.  
32  
33  
34  
35  
36 20 Benight CC. Social cognitive theory of posttraumatic recovery: the role of perceived self-  
37  
38 efficacy. *Behav Res Ther.* 2004;42(10):1129–48.  
39  
40  
41  
42 21 Boelen PA, Smid GE. Disturbed grief: prolonged grief disorder and persistent complex  
43  
44 bereavement disorder. *BMJ.* 2017;357:j2016.  
45  
46  
47  
48 22 Currier JM, Holland JM, Neimeyer RA. Do CBT-Based Interventions Alleviate Distress  
49  
50 Following Bereavement? A Review of the Current Evidence. *Int Cog Ther.* 2010;3:77.93.  
51  
52  
53  
54 23 Doering BK, Eisma MC. Treatment for complicated grief: state of the science and ways  
55  
56 forward. *Curr Opin Psychiatry.* 2016;29(5):286–91.  
57  
58  
59  
60

- 1  
2  
3 24 Johannsen M, Damholdt MF, Zachariae R, et al. Psychological interventions for grief in  
4  
5 adults: A systematic review and meta-analysis of randomized controlled trials. *J Affect*  
6  
7 *Disord.* 2019;253:69–86.  
8  
9  
10  
11 25 Boelen PA, Keijser J de, Hout MA van den, et al. Factors associated with outcome of  
12  
13 cognitive–behavioural therapy for complicated grief: A preliminary study. *Clin Psychol*  
14  
15 *Psychother.* 2011;18(4):284–91.  
16  
17  
18  
19 26 Bryant RA, Kenny L, Joscelyne A, et al. Predictors of treatment response for cognitive  
20  
21 behaviour therapy for prolonged grief disorder. *Eur J Psychotraumatology.* 2019;8(6).  
22  
23  
24  
25 27 Linde K, Trembl J, Steinig J, et al. Grief interventions for people bereaved by suicide: A  
26  
27 systematic review. *PloS One.* 2017;12(6):e0179496.  
28  
29  
30  
31 28 Wittouck C, Van Autreve S, De Jaegere E, et al. The prevention and treatment of  
32  
33 complicated grief: a meta-analysis. *Clin Psychol Rev.* 2011;31(1):69–78.  
34  
35  
36  
37 29 de Heus A, Hengst SMC, de la Rie SM, et al. Day patient treatment for traumatic grief:  
38  
39 preliminary evaluation of a one-year treatment programme for patients with multiple  
40  
41 and traumatic losses. *Eur J Psychotraumatology.* 2017;8(1).  
42  
43  
44  
45 30 van Denderen M, de Keijser J, Stewart R, et al. Treating complicated grief and  
46  
47 posttraumatic stress in homicidally bereaved individuals: A randomized controlled trial.  
48  
49 *Clin Psychol Psychother.* 2018.  
50  
51  
52  
53 31 Eisma MC, Boelen PA, van den Bout J, et al. Internet-Based Exposure and Behavioral  
54  
55 Activation for Complicated Grief and Rumination: A Randomized Controlled Trial. *Behav*  
56  
57 *Ther.* 2015;46(6):729–48.  
58  
59  
60

- 1  
2  
3 32 Kersting A, Dölemeyer R, Steinig J, et al. Brief Internet-based intervention reduces  
4  
5 posttraumatic stress and prolonged grief in parents after the loss of a child during  
6  
7 pregnancy: a randomized controlled trial. *Psychother Psychosom.* 2013;82(6):372–81.  
8  
9  
10  
11 33 Wagner B, Knaevelsrud C, Maercker A. Internet-based cognitive-behavioral therapy for  
12  
13 complicated grief: a randomized controlled trial. *Death Stud.* 2006;30(5):429–53.  
14  
15  
16  
17 34 Baumeister H, Reichler L, Munzinger M, et al. The impact of guidance on Internet-based  
18  
19 mental health interventions — A systematic review. *Internet Interv.* 2014;1(4):205–15.  
20  
21  
22  
23 35 Lichtenthal WG, Corner GW, Sweeney CR, et al. Mental Health Services for Parents Who  
24  
25 Lost a Child to Cancer: If We Build Them, Will They Come? *J Clin Oncol Off J Am Soc Clin*  
26  
27 *Oncol.* 2015;33(20):2246–53.  
28  
29  
30  
31 36 Andersson G, Titov N. Advantages and limitations of Internet-based interventions for  
32  
33 common mental disorders. *World Psychiatry.* 2014;13(1):4–11.  
34  
35  
36  
37 37 Melville KM, Casey LM, Kavanagh DJ. Dropout from Internet-based treatment for  
38  
39 psychological disorders. *Br J Clin Psychol.* 2010;49(Pt 4):455–71.  
40  
41  
42  
43 38 Pihlaja S, Stenberg J-H, Joutsenniemi K, et al. Therapeutic alliance in guided internet  
44  
45 therapy programs for depression and anxiety disorders - A systematic review. *Internet*  
46  
47 *Interv.* 2018;11:1–10.  
48  
49  
50  
51 39 Bordin ES. Theory and research on the therapeutic working alliance: New directions. In:  
52  
53 The working alliance: Theory, research, and practice. Oxford, England: John Wiley &  
54  
55 Sons; 1994. p. 13–37.  
56  
57  
58  
59  
60

- 1  
2  
3 40 Cook JE, Doyle C. Working alliance in online therapy as compared to face-to-face therapy:  
4 preliminary results. *Cyberpsychology Behav Impact Internet Multimed Virtual Real*  
5  
6 *Behav Soc.* 2002;5(2):95–105.  
7  
8  
9  
10  
11 41 Sucala M, Schnur JB, Constantino MJ, et al. The therapeutic relationship in e-therapy for  
12 mental health: a systematic review. *J Med Internet Res.* 2012;14(4):e110.  
13  
14  
15  
16  
17 42 Lenferink LIM, de Keijser J, Wessel I, et al. Cognitive behavioural therapy and mindfulness  
18 for relatives of missing persons: a pilot study. *Pilot Feasibility Stud.* 2019;5(1):93.  
19  
20  
21  
22  
23 43 Boelen PA, Bout J van den. Protocollaire behandeling van persisterende complexe  
24 rouwstoornis. In: Keijsers, G., Minnen, A. van, Verbraak, M., Hoogduin, K., Emmelkamp,  
25 P., (Red.). Protocollaire behandelingen voor volwassenen met psychische klachten. Ed.  
26  
27 1. Amsterdam: Boom; 2017.  
28  
29  
30  
31  
32  
33  
34 44 Boelen PA, Smid GE. The Traumatic Grief Inventory Self-Report Version (TGI-SR):  
35 Introduction and Preliminary Psychometric Evaluation. *J Loss Trauma.* 2017;22(3):196–  
36  
37 212.  
38  
39  
40  
41  
42 45 World Health Organization. ICD-11. Prolonged Grief Disorder Criteria [Internet]. 2018  
43 [Accessed on October 14 2019]. Available from: [https://icd.who.int/browse11/l-](https://icd.who.int/browse11/l-m/en#/http://id.who.int/icd/entity/1183832314)  
44  
45 [m/en#/http://id.who.int/icd/entity/1183832314](https://icd.who.int/browse11/l-m/en#/http://id.who.int/icd/entity/1183832314)  
46  
47  
48  
49  
50 46 Boelen PA, Djelantik AAAMJ, de Keijser J, et al. Further validation of the Traumatic Grief  
51 Inventory-Self Report (TGI-SR): A measure of persistent complex bereavement disorder  
52 and prolonged grief disorder. *Death Stud.* 2019;43(6):351–64.  
53  
54  
55  
56  
57  
58  
59  
60



- 1  
2  
3 47 Blevins CA, Weathers FW, Davis MT, et al. The Posttraumatic Stress Disorder Checklist for  
4  
5 DSM-5 (PCL-5): Development and Initial Psychometric Evaluation. *J Trauma Stress*.  
6  
7 2015;28(6):489–98.  
8  
9  
10  
11 48 Boeschoten, M.A., Bakker, A., Jongedijk, et al. PTSS checklist voor de DSM-5 (PCL-5).  
12  
13 Diemen: Arq Nationaal Psychotrauma Centrum; 2014.  
14  
15  
16  
17 49 Zigmond AS, Snaith RP. The hospital anxiety and depression scale. *Acta Psychiatr Scand*.  
18  
19 1983;67(6):361–70.  
20  
21  
22  
23 50 Spinhoven PH, Ormel J, Sloekers PPA, et al. A validation study of the Hospital Anxiety and  
24  
25 Depression scale (HADS) in different groups of Dutch subjects. *Psychol Med*.  
26  
27 1997;27(2):363–70.  
28  
29  
30  
31 51 Mundt JC, Marks IM, Shear MK, et al. The Work and Social Adjustment Scale: a simple  
32  
33 measure of impairment in functioning. *Br J Psychiatry J Ment Sci*. 2002;180:461–4.  
34  
35  
36  
37 52 de Graaf LE, Gerhards SH, Arntz A, et al. Clinical effectiveness of online computerised  
38  
39 cognitive-behavioural therapy without support for depression in primary care:  
40  
41 randomised trial. *Br J Psychiatry J Ment Sci*. 2009;195(1):73–80.  
42  
43  
44  
45 53 Boelen PA, van den Bout J. Anxious and depressive avoidance and symptoms of  
46  
47 prolonged grief, depression, and post-traumatic stress disorder. *Psychol Belg*.  
48  
49 2010;50(1–2):49–67.  
50  
51  
52  
53 54 Spielberger, C.D. State-Trait Anger Expression Inventory-2. Psychological Assessment  
54  
55 Resources; 1999.  
56  
57  
58  
59  
60

- 1  
2  
3 55 Lievaart M, Franken IHA, Hovens JE. Anger Assessment in Clinical and Nonclinical  
4  
5 Populations: Further Validation of the State-Trait Anger Expression Inventory-2. *J Clin*  
6  
7 *Psychol.* 2016;72(3):263–78.  
8  
9  
10  
11 56 Schwarzer, R., Jerusalem, M. Generalized self-efficacy scale. In: Weinman, J., Wright, S.,  
12  
13 Johnston, M., redacteurs. Measures in health psychology: A user's portfolio Causal  
14  
15 and control beliefs. Windsor, UK: Nfer-Nelson; 1995. p. 35–7.  
16  
17  
18  
19 57 Horvath AO, Greenberg LS. Development and validation of the Working Alliance  
20  
21 Inventory. *J Couns Psychol.* 1989;36(2):223–33.  
22  
23  
24  
25 58 Vertommen, H., Vervaeke, G. Nederlandstalige experimentele vertaling van de Working  
26  
27 Alliance Inventory van Horvath en Greenberg. Leuven: KU; 1990.  
28  
29  
30  
31 59 Munder T, Wilmers F, Leonhart R, et al. Working Alliance Inventory-Short Revised (WAI-  
32  
33 SR): psychometric properties in outpatients and inpatients. *Clin Psychol Psychother.*  
34  
35 2010;17(3):231–9.  
36  
37  
38  
39 60 Snijders, T.A.B., Bosker, R.J. Deviance tests. In: Snijders, T.A.B., Bosker, R.J., (Red.).  
40  
41 Multilevel analysis. London: SAGE Publications Ltd; 2012. p. 97–8.  
42  
43  
44  
45 61 Little, T. Mediation and moderation. In: Little, T., (Red.). Longitudinal Structural Equation  
46  
47 Modeling. New York: The Guilford Press; 2013. p. 286–324.  
48  
49  
50  
51 62 Schumi J, Wittes JT. Through the looking glass: understanding non-inferiority. *Trials.*  
52  
53 2011;12:106.  
54  
55  
56  
57 63 Glickman K, Shear KM, Wall MM. Therapeutic Alliance and Outcome in Complicated Grief  
58  
59 Treatment. *Int J Cogn Ther.* 2018;11(2):222–33.  
60

1  
2  
3 64 Arjadi R, Nauta MH, Bockting CLH. Acceptability of internet-based interventions for  
4  
5 depression in Indonesia. *Internet Interv.* 2018;13:8–15.  
6  
7

8  
9 65 Lim GY, Tam WW, Lu Y, et al. Prevalence of Depression in the Community from 30  
10  
11 Countries between 1994 and 2014. *Sci Rep.* 2018;8(1):2861.  
12  
13

14  
15 66 Lenferink, L.I.M., Boelen, P.A., Smid, G.E., et al. The importance of harmonising diagnostic  
16  
17 criteria sets for pathological grief. *British Journal of Psychiatry.* in press;  
18  
19

20  
21 67 Maciejewski PK, Prigerson HG. Prolonged, but not complicated, grief is a mental disorder.  
22  
23 *Br J Psychiatry.* 2017;211(4):189–91.  
24  
25

26  
27 68 Wakefield JC. Should prolonged grief be reclassified as a mental disorder in DSM-5?:  
28  
29 reconsidering the empirical and conceptual arguments for complicated grief disorder. *J*  
30  
31 *Nerv Ment Dis.* 2012;200(6):499–511.  
32  
33

### 34 35 36 37 **Authors' contributions**

38  
39 JdK, LL, and PB are the principal investigators. LL is the executive researcher. JdK, PB, ME,  
40  
41 and GS are the grant holders. LL developed the study design and wrote the ethics proposal  
42  
43 and drafts of the manuscript. JdK, ME, GS, and PB read, revised, and approved the drafts of  
44  
45 the study design, ethics proposal, and the manuscript.  
46  
47  
48  
49

### 50 51 **Funding statement**

52  
53 Fund Victim Support subsidized this work. This funder does not have ultimate authority over  
54  
55 any of the research activities.  
56  
57

### 58 59 **Competing Interests Statement**

60

1  
2  
3 All authors declare to have no competing interests.  
4  
5

6 **Patient and Public Involvement**  
7

8  
9 A committee of representatives of bereaved people, non-governmental support  
10 organizations, and professionals working with bereaved people is initiated for this project.  
11  
12

13  
14 These committee members are involved in recruitment of participants, pilot-testing research  
15 materials, and dissemination of findings.  
16  
17  
18  
19  
20  
21  
22  
23  
24  
25  
26  
27  
28  
29  
30  
31  
32  
33  
34  
35  
36  
37  
38  
39  
40  
41  
42  
43  
44  
45  
46  
47  
48  
49  
50  
51  
52  
53  
54  
55  
56  
57  
58  
59  
60

For peer review only

# Reporting checklist for protocol of a clinical trial.

Based on the SPIRIT guidelines.

## Instructions to authors

Complete this checklist by entering the page numbers from your manuscript where readers will find each of the items listed below.

Your article may not currently address all the items on the checklist. Please modify your text to include the missing information. If you are certain that an item does not apply, please write "n/a" and provide a short explanation.

Upload your completed checklist as an extra file when you submit to a journal.

In your methods section, say that you used the SPIRIT reporting guidelines, and cite them as:

Chan A-W, Tetzlaff JM, Altman DG, Laupacis A, Gøtzsche PC, Krleža-Jerić K, Hróbjartsson A, Mann H, Dickersin K, Berlin J, Doré C, Parulekar W, Summerskill W, Groves T, Schulz K, Sox H, Rockhold FW, Rennie D, Moher D. SPIRIT 2013 Statement: Defining standard protocol items for clinical trials. *Ann Intern Med.* 2013;158(3):200-207

|                                   |                     | Reporting Item                                                                                               | Page Number |
|-----------------------------------|---------------------|--------------------------------------------------------------------------------------------------------------|-------------|
| <b>Administrative information</b> |                     |                                                                                                              |             |
| Title                             | <a href="#">#1</a>  | Descriptive title identifying the study design, population, interventions, and, if applicable, trial acronym | 1           |
| Trial registration                | <a href="#">#2a</a> | Trial identifier and registry name. If not yet registered, name of intended registry                         | 3           |
| Trial registration: data set      | <a href="#">#2b</a> | All items from the World Health Organization Trial Registration Data Set                                     | n/a         |
| Protocol version                  | <a href="#">#3</a>  | Date and version identifier                                                                                  | n/a         |
| Funding                           | <a href="#">#4</a>  | Sources and types of financial, material, and other support                                                  | 32          |

|    |                      |                     |                                                          |     |
|----|----------------------|---------------------|----------------------------------------------------------|-----|
| 1  | Roles and            | <a href="#">#5a</a> | Names, affiliations, and roles of protocol contributors  | 32  |
| 2  | responsibilities:    |                     |                                                          |     |
| 3  | contributorship      |                     |                                                          |     |
| 4  |                      |                     |                                                          |     |
| 5  |                      |                     |                                                          |     |
| 6  | Roles and            | <a href="#">#5b</a> | Name and contact information for the trial sponsor       | n/a |
| 7  | responsibilities:    |                     |                                                          |     |
| 8  | sponsor contact      |                     |                                                          |     |
| 9  | information          |                     |                                                          |     |
| 10 |                      |                     |                                                          |     |
| 11 |                      |                     |                                                          |     |
| 12 |                      |                     |                                                          |     |
| 13 | Roles and            | <a href="#">#5c</a> | Role of study sponsor and funders, if any, in study      | 32  |
| 14 | responsibilities:    |                     | design; collection, management, analysis, and            |     |
| 15 | sponsor and funder   |                     | interpretation of data; writing of the report; and the   |     |
| 16 |                      |                     | decision to submit the report for publication, including |     |
| 17 |                      |                     | whether they will have ultimate authority over any of    |     |
| 18 |                      |                     | these activities                                         |     |
| 19 |                      |                     |                                                          |     |
| 20 |                      |                     |                                                          |     |
| 21 |                      |                     |                                                          |     |
| 22 |                      |                     |                                                          |     |
| 23 | Roles and            | <a href="#">#5d</a> | Composition, roles, and responsibilities of the          | n/a |
| 24 | responsibilities:    |                     | coordinating centre, steering committee, endpoint        |     |
| 25 | committees           |                     | adjudication committee, data management team, and        |     |
| 26 |                      |                     | other individuals or groups overseeing the trial, if     |     |
| 27 |                      |                     | applicable (see Item 21a for data monitoring committee)  |     |
| 28 |                      |                     |                                                          |     |
| 29 |                      |                     |                                                          |     |
| 30 |                      |                     |                                                          |     |
| 31 | <b>Introduction</b>  |                     |                                                          |     |
| 32 |                      |                     |                                                          |     |
| 33 | Background and       | <a href="#">#6a</a> | Description of research question and justification for   | 4-7 |
| 34 | rationale            |                     | undertaking the trial, including summary of relevant     |     |
| 35 |                      |                     | studies (published and unpublished) examining benefits   |     |
| 36 |                      |                     | and harms for each intervention                          |     |
| 37 |                      |                     |                                                          |     |
| 38 |                      |                     |                                                          |     |
| 39 |                      |                     |                                                          |     |
| 40 | Background and       | <a href="#">#6b</a> | Explanation for choice of comparators                    | 4-7 |
| 41 | rationale: choice of |                     |                                                          |     |
| 42 | comparators          |                     |                                                          |     |
| 43 |                      |                     |                                                          |     |
| 44 |                      |                     |                                                          |     |
| 45 | Objectives           | <a href="#">#7</a>  | Specific objectives or hypotheses                        | 8   |
| 46 |                      |                     |                                                          |     |
| 47 |                      |                     |                                                          |     |
| 48 | Trial design         | <a href="#">#8</a>  | Description of trial design including type of trial (eg, | 10  |
| 49 |                      |                     | parallel group, crossover, factorial, single group),     |     |
| 50 |                      |                     | allocation ratio, and framework (eg, superiority,        |     |
| 51 |                      |                     | equivalence, non-inferiority, exploratory)               |     |
| 52 |                      |                     |                                                          |     |
| 53 |                      |                     |                                                          |     |
| 54 |                      |                     |                                                          |     |

**Methods:  
Participants,**

## interventions, and outcomes

|    |                      |                      |                                                                                                                                                                                                                                                                                                                                                                                |
|----|----------------------|----------------------|--------------------------------------------------------------------------------------------------------------------------------------------------------------------------------------------------------------------------------------------------------------------------------------------------------------------------------------------------------------------------------|
| 1  |                      |                      |                                                                                                                                                                                                                                                                                                                                                                                |
| 2  |                      |                      |                                                                                                                                                                                                                                                                                                                                                                                |
| 3  |                      |                      |                                                                                                                                                                                                                                                                                                                                                                                |
| 4  | Study setting        | <a href="#">#9</a>   | Description of study settings (eg, community clinic, academic hospital) and list of countries where data will be collected. Reference to where list of study sites can be obtained                                                                                                                                                                                             |
| 5  |                      |                      |                                                                                                                                                                                                                                                                                                                                                                                |
| 6  |                      |                      |                                                                                                                                                                                                                                                                                                                                                                                |
| 7  |                      |                      |                                                                                                                                                                                                                                                                                                                                                                                |
| 8  |                      |                      |                                                                                                                                                                                                                                                                                                                                                                                |
| 9  |                      |                      |                                                                                                                                                                                                                                                                                                                                                                                |
| 10 |                      |                      |                                                                                                                                                                                                                                                                                                                                                                                |
| 11 | Eligibility criteria | <a href="#">#10</a>  | Inclusion and exclusion criteria for participants. If applicable, eligibility criteria for study centres and individuals who will perform the interventions (eg, surgeons, psychotherapists)                                                                                                                                                                                   |
| 12 |                      |                      |                                                                                                                                                                                                                                                                                                                                                                                |
| 13 |                      |                      |                                                                                                                                                                                                                                                                                                                                                                                |
| 14 |                      |                      |                                                                                                                                                                                                                                                                                                                                                                                |
| 15 |                      |                      |                                                                                                                                                                                                                                                                                                                                                                                |
| 16 |                      |                      |                                                                                                                                                                                                                                                                                                                                                                                |
| 17 | Interventions:       |                      |                                                                                                                                                                                                                                                                                                                                                                                |
| 18 | description          | <a href="#">#11a</a> | Interventions for each group with sufficient detail to allow replication, including how and when they will be administered                                                                                                                                                                                                                                                     |
| 19 |                      |                      |                                                                                                                                                                                                                                                                                                                                                                                |
| 20 |                      |                      |                                                                                                                                                                                                                                                                                                                                                                                |
| 21 |                      |                      |                                                                                                                                                                                                                                                                                                                                                                                |
| 22 |                      |                      |                                                                                                                                                                                                                                                                                                                                                                                |
| 23 | Interventions:       |                      |                                                                                                                                                                                                                                                                                                                                                                                |
| 24 | modifications        | <a href="#">#11b</a> | Criteria for discontinuing or modifying allocated interventions for a given trial participant (eg, drug dose change in response to harms, participant request, or improving / worsening disease)                                                                                                                                                                               |
| 25 |                      |                      |                                                                                                                                                                                                                                                                                                                                                                                |
| 26 |                      |                      |                                                                                                                                                                                                                                                                                                                                                                                |
| 27 |                      |                      |                                                                                                                                                                                                                                                                                                                                                                                |
| 28 |                      |                      |                                                                                                                                                                                                                                                                                                                                                                                |
| 29 |                      |                      |                                                                                                                                                                                                                                                                                                                                                                                |
| 30 | Interventions:       |                      |                                                                                                                                                                                                                                                                                                                                                                                |
| 31 | adherence            | <a href="#">#11c</a> | Strategies to improve adherence to intervention protocols, and any procedures for monitoring adherence (eg, drug tablet return; laboratory tests)                                                                                                                                                                                                                              |
| 32 |                      |                      |                                                                                                                                                                                                                                                                                                                                                                                |
| 33 |                      |                      |                                                                                                                                                                                                                                                                                                                                                                                |
| 34 |                      |                      |                                                                                                                                                                                                                                                                                                                                                                                |
| 35 | Interventions:       |                      |                                                                                                                                                                                                                                                                                                                                                                                |
| 36 | concomitant care     | <a href="#">#11d</a> | Relevant concomitant care and interventions that are permitted or prohibited during the trial                                                                                                                                                                                                                                                                                  |
| 37 |                      |                      |                                                                                                                                                                                                                                                                                                                                                                                |
| 38 |                      |                      |                                                                                                                                                                                                                                                                                                                                                                                |
| 39 | Outcomes             | <a href="#">#12</a>  | Primary, secondary, and other outcomes, including the specific measurement variable (eg, systolic blood pressure), analysis metric (eg, change from baseline, final value, time to event), method of aggregation (eg, median, proportion), and time point for each outcome. Explanation of the clinical relevance of chosen efficacy and harm outcomes is strongly recommended |
| 40 |                      |                      |                                                                                                                                                                                                                                                                                                                                                                                |
| 41 |                      |                      |                                                                                                                                                                                                                                                                                                                                                                                |
| 42 |                      |                      |                                                                                                                                                                                                                                                                                                                                                                                |
| 43 |                      |                      |                                                                                                                                                                                                                                                                                                                                                                                |
| 44 |                      |                      |                                                                                                                                                                                                                                                                                                                                                                                |
| 45 |                      |                      |                                                                                                                                                                                                                                                                                                                                                                                |
| 46 |                      |                      |                                                                                                                                                                                                                                                                                                                                                                                |
| 47 |                      |                      |                                                                                                                                                                                                                                                                                                                                                                                |
| 48 |                      |                      |                                                                                                                                                                                                                                                                                                                                                                                |
| 49 |                      |                      |                                                                                                                                                                                                                                                                                                                                                                                |
| 50 | Participant timeline | <a href="#">#13</a>  | Time schedule of enrolment, interventions (including any run-ins and washouts), assessments, and visits for participants. A schematic diagram is highly recommended (see Figure)                                                                                                                                                                                               |
| 51 |                      |                      |                                                                                                                                                                                                                                                                                                                                                                                |
| 52 |                      |                      |                                                                                                                                                                                                                                                                                                                                                                                |
| 53 |                      |                      |                                                                                                                                                                                                                                                                                                                                                                                |
| 54 |                      |                      |                                                                                                                                                                                                                                                                                                                                                                                |
| 55 |                      |                      |                                                                                                                                                                                                                                                                                                                                                                                |
| 56 |                      |                      |                                                                                                                                                                                                                                                                                                                                                                                |
| 57 | Sample size          | <a href="#">#14</a>  | Estimated number of participants needed to achieve study objectives and how it was determined, including                                                                                                                                                                                                                                                                       |
| 58 |                      |                      |                                                                                                                                                                                                                                                                                                                                                                                |
| 59 |                      |                      |                                                                                                                                                                                                                                                                                                                                                                                |
| 60 |                      |                      |                                                                                                                                                                                                                                                                                                                                                                                |

clinical and statistical assumptions supporting any sample size calculations

Recruitment [#15](#) Strategies for achieving adequate participant enrolment to reach target sample size 11-12

## Methods:

### Assignment of interventions (for controlled trials)

Allocation: sequence generation [#16a](#) Method of generating the allocation sequence (eg, computer-generated random numbers), and list of any factors for stratification. To reduce predictability of a random sequence, details of any planned restriction (eg, blocking) should be provided in a separate document that is unavailable to those who enrol participants or assign interventions 10

Allocation concealment mechanism [#16b](#) Mechanism of implementing the allocation sequence (eg, central telephone; sequentially numbered, opaque, sealed envelopes), describing any steps to conceal the sequence until interventions are assigned 10

Allocation: implementation [#16c](#) Who will generate the allocation sequence, who will enrol participants, and who will assign participants to interventions 10

Blinding (masking) [#17a](#) Who will be blinded after assignment to interventions (eg, trial participants, care providers, outcome assessors, data analysts), and how 10

Blinding (masking): emergency unblinding [#17b](#) If blinded, circumstances under which unblinding is permissible, and procedure for revealing a participant's allocated intervention during the trial n/a

### Methods: Data collection, management, and analysis

Data collection plan [#18a](#) Plans for assessment and collection of outcome, baseline, and other trial data, including any related processes to promote data quality (eg, duplicate 15-18



measurements, training of assessors) and a description of study instruments (eg, questionnaires, laboratory tests) along with their reliability and validity, if known. Reference to where data collection forms can be found, if not in the protocol

|    |                                                  |                                                                                                                                                                                                                                                                                                                                       |       |
|----|--------------------------------------------------|---------------------------------------------------------------------------------------------------------------------------------------------------------------------------------------------------------------------------------------------------------------------------------------------------------------------------------------|-------|
| 1  |                                                  |                                                                                                                                                                                                                                                                                                                                       |       |
| 2  |                                                  |                                                                                                                                                                                                                                                                                                                                       |       |
| 3  |                                                  |                                                                                                                                                                                                                                                                                                                                       |       |
| 4  |                                                  |                                                                                                                                                                                                                                                                                                                                       |       |
| 5  |                                                  |                                                                                                                                                                                                                                                                                                                                       |       |
| 6  |                                                  |                                                                                                                                                                                                                                                                                                                                       |       |
| 7  |                                                  |                                                                                                                                                                                                                                                                                                                                       |       |
| 8  |                                                  |                                                                                                                                                                                                                                                                                                                                       |       |
| 9  | Data collection plan:                            | <a href="#">#18b</a>                                                                                                                                                                                                                                                                                                                  |       |
| 10 | retention                                        | Plans to promote participant retention and complete follow-up, including list of any outcome data to be collected for participants who discontinue or deviate from intervention protocols                                                                                                                                             | n/a   |
| 11 |                                                  |                                                                                                                                                                                                                                                                                                                                       |       |
| 12 |                                                  |                                                                                                                                                                                                                                                                                                                                       |       |
| 13 |                                                  |                                                                                                                                                                                                                                                                                                                                       |       |
| 14 |                                                  |                                                                                                                                                                                                                                                                                                                                       |       |
| 15 | Data management                                  | <a href="#">#19</a>                                                                                                                                                                                                                                                                                                                   |       |
| 16 |                                                  | Plans for data entry, coding, security, and storage, including any related processes to promote data quality (eg, double data entry; range checks for data values). Reference to where details of data management procedures can be found, if not in the protocol                                                                     | 20    |
| 17 |                                                  |                                                                                                                                                                                                                                                                                                                                       |       |
| 18 |                                                  |                                                                                                                                                                                                                                                                                                                                       |       |
| 19 |                                                  |                                                                                                                                                                                                                                                                                                                                       |       |
| 20 |                                                  |                                                                                                                                                                                                                                                                                                                                       |       |
| 21 |                                                  |                                                                                                                                                                                                                                                                                                                                       |       |
| 22 |                                                  |                                                                                                                                                                                                                                                                                                                                       |       |
| 23 | Statistics: outcomes                             | <a href="#">#20a</a>                                                                                                                                                                                                                                                                                                                  |       |
| 24 |                                                  | Statistical methods for analysing primary and secondary outcomes. Reference to where other details of the statistical analysis plan can be found, if not in the protocol                                                                                                                                                              | 18-19 |
| 25 |                                                  |                                                                                                                                                                                                                                                                                                                                       |       |
| 26 |                                                  |                                                                                                                                                                                                                                                                                                                                       |       |
| 27 |                                                  |                                                                                                                                                                                                                                                                                                                                       |       |
| 28 |                                                  |                                                                                                                                                                                                                                                                                                                                       |       |
| 29 |                                                  |                                                                                                                                                                                                                                                                                                                                       |       |
| 30 | Statistics: additional analyses                  | <a href="#">#20b</a>                                                                                                                                                                                                                                                                                                                  |       |
| 31 |                                                  | Methods for any additional analyses (eg, subgroup and adjusted analyses)                                                                                                                                                                                                                                                              | 18-19 |
| 32 |                                                  |                                                                                                                                                                                                                                                                                                                                       |       |
| 33 |                                                  |                                                                                                                                                                                                                                                                                                                                       |       |
| 34 | Statistics: analysis population and missing data | <a href="#">#20c</a>                                                                                                                                                                                                                                                                                                                  |       |
| 35 |                                                  | Definition of analysis population relating to protocol non-adherence (eg, as randomised analysis), and any statistical methods to handle missing data (eg, multiple imputation)                                                                                                                                                       | 18-19 |
| 36 |                                                  |                                                                                                                                                                                                                                                                                                                                       |       |
| 37 |                                                  |                                                                                                                                                                                                                                                                                                                                       |       |
| 38 |                                                  |                                                                                                                                                                                                                                                                                                                                       |       |
| 39 |                                                  |                                                                                                                                                                                                                                                                                                                                       |       |
| 40 |                                                  |                                                                                                                                                                                                                                                                                                                                       |       |
| 41 | <b>Methods: Monitoring</b>                       |                                                                                                                                                                                                                                                                                                                                       |       |
| 42 |                                                  |                                                                                                                                                                                                                                                                                                                                       |       |
| 43 | Data monitoring: formal committee                | <a href="#">#21a</a>                                                                                                                                                                                                                                                                                                                  |       |
| 44 |                                                  | Composition of data monitoring committee (DMC); summary of its role and reporting structure; statement of whether it is independent from the sponsor and competing interests; and reference to where further details about its charter can be found, if not in the protocol. Alternatively, an explanation of why a DMC is not needed | 20    |
| 45 |                                                  |                                                                                                                                                                                                                                                                                                                                       |       |
| 46 |                                                  |                                                                                                                                                                                                                                                                                                                                       |       |
| 47 |                                                  |                                                                                                                                                                                                                                                                                                                                       |       |
| 48 |                                                  |                                                                                                                                                                                                                                                                                                                                       |       |
| 49 |                                                  |                                                                                                                                                                                                                                                                                                                                       |       |
| 50 |                                                  |                                                                                                                                                                                                                                                                                                                                       |       |
| 51 |                                                  |                                                                                                                                                                                                                                                                                                                                       |       |
| 52 |                                                  |                                                                                                                                                                                                                                                                                                                                       |       |
| 53 |                                                  |                                                                                                                                                                                                                                                                                                                                       |       |
| 54 | Data monitoring: interim analysis                | <a href="#">#21b</a>                                                                                                                                                                                                                                                                                                                  |       |
| 55 |                                                  | Description of any interim analyses and stopping guidelines, including who will have access to these                                                                                                                                                                                                                                  | 20    |
| 56 |                                                  |                                                                                                                                                                                                                                                                                                                                       |       |
| 57 |                                                  |                                                                                                                                                                                                                                                                                                                                       |       |
| 58 |                                                  |                                                                                                                                                                                                                                                                                                                                       |       |
| 59 |                                                  |                                                                                                                                                                                                                                                                                                                                       |       |
| 60 |                                                  |                                                                                                                                                                                                                                                                                                                                       |       |

interim results and make the final decision to terminate the trial

|    |                      |                      |                                                              |
|----|----------------------|----------------------|--------------------------------------------------------------|
| 1  |                      |                      |                                                              |
| 2  |                      |                      |                                                              |
| 3  |                      |                      |                                                              |
| 4  | Harms                | <a href="#">#22</a>  | Plans for collecting, assessing, reporting, and managing 20  |
| 5  |                      |                      | solicited and spontaneously reported adverse events          |
| 6  |                      |                      | and other unintended effects of trial interventions or trial |
| 7  |                      |                      | conduct                                                      |
| 8  |                      |                      |                                                              |
| 9  |                      |                      |                                                              |
| 10 |                      |                      |                                                              |
| 11 | Auditing             | <a href="#">#23</a>  | Frequency and procedures for auditing trial conduct, if 20   |
| 12 |                      |                      | any, and whether the process will be independent from        |
| 13 |                      |                      | investigators and the sponsor                                |
| 14 |                      |                      |                                                              |
| 15 |                      |                      |                                                              |
| 16 | <b>Ethics and</b>    |                      |                                                              |
| 17 | <b>dissemination</b> |                      |                                                              |
| 18 |                      |                      |                                                              |
| 19 |                      |                      |                                                              |
| 20 | Research ethics      | <a href="#">#24</a>  | Plans for seeking research ethics committee / 20             |
| 21 | approval             |                      | institutional review board (REC / IRB) approval              |
| 22 |                      |                      |                                                              |
| 23 |                      |                      |                                                              |
| 24 | Protocol amendments  | <a href="#">#25</a>  | Plans for communicating important protocol 20                |
| 25 |                      |                      | modifications (eg, changes to eligibility criteria,          |
| 26 |                      |                      | outcomes, analyses) to relevant parties (eg,                 |
| 27 |                      |                      | investigators, REC / IRBs, trial participants, trial         |
| 28 |                      |                      | registries, journals, regulators)                            |
| 29 |                      |                      |                                                              |
| 30 |                      |                      |                                                              |
| 31 |                      |                      |                                                              |
| 32 | Consent or assent    | <a href="#">#26a</a> | Who will obtain informed consent or assent from 20           |
| 33 |                      |                      | potential trial participants or authorised surrogates, and   |
| 34 |                      |                      | how (see Item 32)                                            |
| 35 |                      |                      |                                                              |
| 36 |                      |                      |                                                              |
| 37 | Consent or assent:   | <a href="#">#26b</a> | Additional consent provisions for collection and use of n/a  |
| 38 | ancillary studies    |                      | participant data and biological specimens in ancillary       |
| 39 |                      |                      | studies, if applicable                                       |
| 40 |                      |                      |                                                              |
| 41 |                      |                      |                                                              |
| 42 |                      |                      |                                                              |
| 43 | Confidentiality      | <a href="#">#27</a>  | How personal information about potential and enrolled 20     |
| 44 |                      |                      | participants will be collected, shared, and maintained in    |
| 45 |                      |                      | order to protect confidentiality before, during, and after   |
| 46 |                      |                      | the trial                                                    |
| 47 |                      |                      |                                                              |
| 48 |                      |                      |                                                              |
| 49 | Declaration of       | <a href="#">#28</a>  | Financial and other competing interests for principal 32     |
| 50 | interests            |                      | investigators for the overall trial and each study site      |
| 51 |                      |                      |                                                              |
| 52 |                      |                      |                                                              |
| 53 | Data access          | <a href="#">#29</a>  | Statement of who will have access to the final trial 20      |
| 54 |                      |                      | dataset, and disclosure of contractual agreements that       |
| 55 |                      |                      | limit such access for investigators                          |
| 56 |                      |                      |                                                              |
| 57 |                      |                      |                                                              |
| 58 |                      |                      |                                                              |
| 59 |                      |                      |                                                              |
| 60 |                      |                      |                                                              |

|    |                          |                      |                                                                |       |
|----|--------------------------|----------------------|----------------------------------------------------------------|-------|
| 1  | Ancillary and post trial | <a href="#">#30</a>  | Provisions, if any, for ancillary and post-trial care, and for | 20    |
| 2  | care                     |                      | compensation to those who suffer harm from trial               |       |
| 3  |                          |                      | participation                                                  |       |
| 4  |                          |                      |                                                                |       |
| 5  |                          |                      |                                                                |       |
| 6  | Dissemination policy:    | <a href="#">#31a</a> | Plans for investigators and sponsor to communicate trial       | 19-20 |
| 7  | trial results            |                      | results to participants, healthcare professionals, the         |       |
| 8  |                          |                      | public, and other relevant groups (eg, via publication,        |       |
| 9  |                          |                      | reporting in results databases, or other data sharing          |       |
| 10 |                          |                      | arrangements), including any publication restrictions          |       |
| 11 |                          |                      |                                                                |       |
| 12 |                          |                      |                                                                |       |
| 13 |                          |                      |                                                                |       |
| 14 | Dissemination policy:    | <a href="#">#31b</a> | Authorship eligibility guidelines and any intended use of      | n/a   |
| 15 | authorship               |                      | professional writers                                           |       |
| 16 |                          |                      |                                                                |       |
| 17 |                          |                      |                                                                |       |
| 18 | Dissemination policy:    | <a href="#">#31c</a> | Plans, if any, for granting public access to the full          | n/a   |
| 19 | reproducible research    |                      | protocol, participant-level dataset, and statistical code      |       |
| 20 |                          |                      |                                                                |       |
| 21 |                          |                      |                                                                |       |
| 22 | <b>Appendices</b>        |                      |                                                                |       |
| 23 |                          |                      |                                                                |       |
| 24 | Informed consent         | <a href="#">#32</a>  | Model consent form and other related documentation             | n/a   |
| 25 | materials                |                      | given to participants and authorised surrogates                |       |
| 26 |                          |                      |                                                                |       |
| 27 |                          |                      |                                                                |       |
| 28 | Biological specimens     | <a href="#">#33</a>  | Plans for collection, laboratory evaluation, and storage of    | n/a   |
| 29 |                          |                      | biological specimens for genetic or molecular analysis in      |       |
| 30 |                          |                      | the current trial and for future use in ancillary studies, if  |       |
| 31 |                          |                      | applicable                                                     |       |
| 32 |                          |                      |                                                                |       |
| 33 |                          |                      |                                                                |       |
| 34 |                          |                      |                                                                |       |

35 None The SPIRIT checklist is distributed under the terms of the Creative Commons Attribution  
 36 License CC-BY-ND 3.0. This checklist can be completed online using <https://www.goodreports.org/>, a  
 37 tool made by the [EQUATOR Network](#) in collaboration with [Penelope.ai](#)  
 38  
 39  
 40  
 41  
 42  
 43  
 44  
 45  
 46  
 47  
 48  
 49  
 50  
 51  
 52  
 53  
 54  
 55  
 56  
 57  
 58  
 59  
 60

# BMJ Open

## Online cognitive behavioral therapy for traumatically bereaved people: Study protocol for a randomized waitlist-controlled trial

|                                 |                                                                                                                                                                                                                                                                                                                                                                                                                                                   |
|---------------------------------|---------------------------------------------------------------------------------------------------------------------------------------------------------------------------------------------------------------------------------------------------------------------------------------------------------------------------------------------------------------------------------------------------------------------------------------------------|
| Journal:                        | <i>BMJ Open</i>                                                                                                                                                                                                                                                                                                                                                                                                                                   |
| Manuscript ID                   | bmjopen-2019-035050.R1                                                                                                                                                                                                                                                                                                                                                                                                                            |
| Article Type:                   | Protocol                                                                                                                                                                                                                                                                                                                                                                                                                                          |
| Date Submitted by the Author:   | 11-Jun-2020                                                                                                                                                                                                                                                                                                                                                                                                                                       |
| Complete List of Authors:       | Lenferink, Lonneke; Rijksuniversiteit Groningen, Clinical Psychology and Experimental Psychopathology; Utrecht University, Clinical Psychology de Keijser, Jos; Rijksuniversiteit Groningen, Clinical Psychology and Experimental Psychopathology<br>Eisma, Maarten; Clinical Psychology and Experimental Psychopathology<br>Boelen, Paul; Utrecht University, Clinical Psychology; Foundation Centrum '45<br>Smid, Geert; Foundation Centrum '45 |
| <b>Primary Subject Heading</b>: | Mental health                                                                                                                                                                                                                                                                                                                                                                                                                                     |
| Secondary Subject Heading:      | Mental health, Evidence based practice                                                                                                                                                                                                                                                                                                                                                                                                            |
| Keywords:                       | PSYCHIATRY, Adult psychiatry < PSYCHIATRY, PUBLIC HEALTH                                                                                                                                                                                                                                                                                                                                                                                          |
|                                 |                                                                                                                                                                                                                                                                                                                                                                                                                                                   |

SCHOLARONE™  
Manuscripts



I, the Submitting Author has the right to grant and does grant on behalf of all authors of the Work (as defined in the below author licence), an exclusive licence and/or a non-exclusive licence for contributions from authors who are: i) UK Crown employees; ii) where BMJ has agreed a CC-BY licence shall apply, and/or iii) in accordance with the terms applicable for US Federal Government officers or employees acting as part of their official duties; on a worldwide, perpetual, irrevocable, royalty-free basis to BMJ Publishing Group Ltd ("BMJ") its licensees and where the relevant Journal is co-owned by BMJ to the co-owners of the Journal, to publish the Work in this journal and any other BMJ products and to exploit all rights, as set out in our [licence](#).

The Submitting Author accepts and understands that any supply made under these terms is made by BMJ to the Submitting Author unless you are acting as an employee on behalf of your employer or a postgraduate student of an affiliated institution which is paying any applicable article publishing charge ("APC") for Open Access articles. Where the Submitting Author wishes to make the Work available on an Open Access basis (and intends to pay the relevant APC), the terms of reuse of such Open Access shall be governed by a Creative Commons licence – details of these licences and which [Creative Commons](#) licence will apply to this Work are set out in our licence referred to above.

Other than as permitted in any relevant BMJ Author's Self Archiving Policies, I confirm this Work has not been accepted for publication elsewhere, is not being considered for publication elsewhere and does not duplicate material already published. I confirm all authors consent to publication of this Work and authorise the granting of this licence.

1  
2  
3 **Online cognitive behavioral therapy for traumatically bereaved people: Study protocol for**  
4  
5 **a randomized waitlist-controlled trial**  
6  
7

8 Lenferink, L.I.M.\*<sup>1,2</sup>, de Keijser, J.<sup>1</sup>, Eisma, M.C.<sup>1</sup>, Smid, G.E.<sup>3,4,5</sup>, & Boelen, P.A.<sup>2,3,4</sup>  
9  
10

11  
12 <sup>1</sup> Department of Clinical Psychology and Experimental Psychopathology, Faculty of  
13 Behavioral and Social Sciences, University of Groningen, Grote Kruisstraat 2/1, 9712 TS  
14 Groningen, The Netherlands. E-mail L.I.M. Lenferink: l.i.m.lenferink@rug.nl.  
15  
16

17  
18  
19  
20 <sup>2</sup> Department of Clinical Psychology, Faculty of Social Sciences, Utrecht University, P.O. Box  
21 80140, 3508 TC, Utrecht, The Netherlands.  
22  
23

24  
25  
26 <sup>3</sup> ARQ Nationaal Psychotrauma Centre, Nienoord 5, 1112 XE, Diemen, The Netherlands  
27  
28

29  
30 <sup>4</sup> Foundation Centrum '45, Nienoord 5, 1112 XE Diemen, The Netherlands  
31  
32

33  
34 <sup>5</sup> University of Humanistic Studies, Utrecht, The Netherlands  
35

36 \*Corresponding author  
37  
38  
39  
40  
41  
42  
43  
44  
45  
46  
47  
48  
49  
50  
51  
52  
53  
54  
55  
56  
57  
58  
59  
60

## Abstract

### Introduction

The traumatic death of a loved one, such as death due to a traffic accident, can precipitate persistent complex bereavement disorder (PCBD) and comorbid posttraumatic stress disorder (PTSD) and depression. Waitlist-controlled trials have shown that grief-specific cognitive behavioral therapy (CBT) is an effective treatment for such mental health problems. This is the first study that will examine the effectiveness of online CBT (vs. waitlist controls) in a sample exclusively comprised of people bereaved by a traumatic death. Our primary hypothesis is that people allocated to the online CBT condition will show larger reductions in PCBD, PTSD, and depression symptom levels at post-treatment than people allocated to a waitlist. We further expect that reductions in symptom levels during treatment are associated with reductions of negative cognitions and avoidance behaviors and the experience of fewer accident-related stressors. Moreover, the effect of the quality of the therapeutic alliance on treatment effects and drop-out rates will be explored.

### Methods and analysis

A two-arm (online CBT vs. waiting list) open label parallel randomized controlled trial (RCT) will be conducted. Participants will complete questionnaires at pre-treatment and 12 and 20 weeks after study enrolment. Eligible for participation are Dutch adults who lost a loved one at least one year earlier due to a traffic accident and report clinically relevant levels of PCBD, PTSD, and/or depression. Multilevel modeling will be used.

### Ethics and dissemination

1  
2  
3 Ethics approval has been received (METc UMCG: M20.252121). This study will provide new  
4  
5 insights in the effectiveness of online CBT for traumatically bereaved people. If the  
6  
7 treatment is demonstrated to be effective, it will be made publicly accessible. Findings will  
8  
9 be disseminated among lay people (e.g., through newsletters and media performances), our  
10  
11 collaborators (e.g., through presentations at support organizations), and clinicians and  
12  
13 researchers (e.g., through conference presentations and scientific journal articles).  
14  
15  
16  
17

### 18 **Strengths and limitations of this study**

- 21 • This study is the first to examine the effectiveness of online CBT (vs. waitlist controls)  
22 in reducing psychopathology after traumatic loss in an RCT.  
23
- 24 • This study is one of the first to examine potential correlates of change in symptom  
25 levels following online treatment after traumatic loss.  
26
- 27 • We are not able to formally test mediators or moderators of treatment effects.  
28
- 29 • We are not able to examine if online CBT has equal effects as face-to-face CBT.  
30
- 31 • We are not able to establish formal diagnoses, as we use self-report questionnaires,  
32 instead of diagnostic interviews, to assess symptom levels.  
33  
34  
35  
36  
37  
38  
39  
40  
41

42 **Trial registration number:** NL7497 (Dutch Trial Register)

43 **Word Count:** 5,133 words including main text  
44  
45  
46  
47  
48  
49  
50  
51  
52  
53  
54  
55  
56  
57  
58  
59  
60



Worldwide, traffic accidents represent the leading cause of unnatural deaths(1). Ten to 20 percent of bereaved people who experience natural deaths (e.g., illness) develop severe and persistent grief-related distress, including persistent complex bereavement disorder (PCBD), posttraumatic stress disorder (PTSD), and depression(2,3). Notably, PCBD has been introduced as other specified trauma- and stressor-related disorder, in the latest version of the Diagnostic and Statistical manual of Mental Diseases (DSM-5)(4). PCBD can be diagnosed if, after the death of a significant other at least 12 months earlier, a person experiences persistent yearning for the deceased and symptoms of reactive distress (e.g., emotional numbness) and social/identity disruption (e.g., feeling alone) causing impairment in daily life. While some PCBD symptoms overlap with PTSD (e.g., anger) and depression symptoms (e.g., diminished interest in activities), several studies have shown that these three syndromes are distinct(5–7). Unexpected/violent losses of a significant other, also referred to as a traumatic losses, including deaths caused by traffic accidents, increase risks for the development of PCBD, PTSD, and depression(8,9).

#### *Heightened risk for developing psychopathology after deaths due to traffic accident*

Specific circumstances of losses caused by accidents may account for the elevated risk of grief-related distress. For instance, experiencing multiple losses simultaneously, being a witness to the accident, and juridical and financial consequences are proposed to exacerbate grief-related distress(10). Furthermore, negative cognitions and avoidance behaviors may mediate the influence of sudden/violent loss on grief, PTSD, and depression levels(11). According to a cognitive-behavioral model three interacting malleable processes underlie disturbed grief reactions: i) negative cognitions, ii) avoidance behavior, and iii) difficulties integrating the loss into the autobiographical knowledge base(12).

1  
2  
3           Experiencing a loss due to a traffic accident may violate basic assumptions about the  
4 world being a safe place(13). This may fuel negative cognitions (e.g., “I’m less worthy, since  
5 s/he died” and “The death of him/her has taught me that the world is unjust) that may  
6 exacerbate and maintain acute grief responses(14). Avoidance behaviors include depressive  
7 avoidance and anxious avoidance strategies. Depressive avoidance refers to withdrawal from  
8 social and occupational activities that were perceived as fulfilling before the death, out of  
9 the conviction that these activities are no longer meaningful. Anxious avoidance strategies  
10 serve to prevent confrontation with the reality of the death, out of fear that confrontation is  
11 too painful(12). One potential way to avoid confrontation with the reality of the loss, is to  
12 focus on angry thoughts and feelings (e.g., “I was angry at the police, courts, or  
13 administration, because they did not do their work well enough”)(15). This seems to be a  
14 frequently used avoidant coping strategy in bereaved people after traffic accidents and is  
15 strongly related to PTSD(16). Difficulty with integration of the loss into the autobiographical  
16 knowledge base refers to the difficulties connecting factual knowledge that the loss is  
17 irreversible with existing information about the self and the relationship with the lost  
18 person, stored in autobiographical memory. Memories related to the loss may lack context  
19 in terms of time and place, causing the loss to be experienced as unreal(17). It has been  
20 argued that this “sense of unrealness” may trigger intrusive memories and increase feelings  
21 of numbness or shock once the bereaved person is confronted with reminders of the  
22 loss(17,18). The extent to which a person believes that one is capable of managing stressor-  
23 related thoughts, emotions, and behaviors, also referred to as self-efficacy (e.g., “I can  
24 usually handle whatever comes my way”), has also been determined as an important factor  
25 facilitating coping with traumatic stressors(19). Decreased self-efficacy, negative cognitions  
26  
27  
28  
29  
30  
31  
32  
33  
34  
35  
36  
37  
38  
39  
40  
41  
42  
43  
44  
45  
46  
47  
48  
49  
50  
51  
52  
53  
54  
55  
56  
57  
58  
59  
60

1  
2  
3 and insufficient integration of the loss may contribute to increased sensitivity to loss  
4  
5 reminders or secondary stressors following traumatic loss(20).  
6  
7

### 8 9 *Cognitive-behavioral therapy for grief-related distress*

10  
11 Grief-specific CBT has been demonstrated to be the most effective treatment for bereaved  
12  
13 people with elevated grief levels(21–24). CBT targets the abovementioned cognitive-  
14  
15 behavioral variables with cognitive restructuring, loss-related exposure, and behavioral  
16  
17 activation. Notably, research on putative mechanisms of change of grief-specific CBT is  
18  
19 sparse(23) (but see(25,26)). Examining the effectiveness of grief-specific CBT and its  
20  
21 potential mechanisms of change in traumatically bereaved people with traumatic grief is  
22  
23 clinically relevant because it would enable tailoring of interventions to the specific needs of  
24  
25 this group, which could improve treatment outcomes(27).  
26  
27  
28  
29  
30  
31

32  
33 Whilst the majority of trials assess the efficacy of face-to-face CBT(24), so far, to the  
34  
35 best of our knowledge, three online CBT-based interventions have been developed for  
36  
37 distressed bereaved people(28–30). These prior studies provided preliminary data on the  
38  
39 potential effectiveness of online grief-specific CBT, but had some limitations. For instance,  
40  
41 treatment was solely provided to people who experienced perinatal loss (29) or included  
42  
43 relatively small samples (28). Comparability between these three studies is also limited,  
44  
45 because interventions differed in treatment content; different elements of CBT were  
46  
47 offered, for instance behavioral activation, exposure (28), or writing assignments (29,30).  
48  
49 Offering CBT via the internet has some potential advantages. It may lower the threshold for  
50  
51 seeking treatment, because it can be delivered independent of geographical location.  
52  
53 Furthermore, asynchronous communication may be used, allowing the client and therapist  
54  
55 can contact each other at any preferred time(31). This may counter barriers to mental health  
56  
57  
58  
59  
60

1  
2  
3 service use, such as difficulties with finding help, transportation concerns, or difficulties  
4  
5 scheduling treatment sessions(32). In addition, online CBT could reduce treatment costs,  
6  
7 improving accessibility and dissemination of care for people in need of support(33).  
8  
9  
10 Moreover, during times of a crisis, such as the COVID-19 pandemic, it seems more relevant  
11  
12 than ever to further examine the effectiveness of online CBT for distressed bereaved people,  
13  
14 as it will allow them to retain access to evidence-based care (34).  
15  
16

17  
18 A potential downside to online CBT is the high dropout rate found in earlier  
19  
20 studies(33,35). It has been argued that a strong therapeutic alliance might support  
21  
22 adherence to online treatment and mediates treatment effects (36). Therapeutic alliance is  
23  
24 defined as a positive emotional bond between client and therapist, whereby both parties  
25  
26 agree on the tasks and goals of the treatment(37). The client-therapist relationship might  
27  
28 also explain why online treatments are more effective with therapist guidance than without  
29  
30 (31). Concerns have been raised that developing a therapeutic relationship might be more  
31  
32 difficult when non-verbal communication is absent(38). However, studies in non-bereaved  
33  
34 samples indicate that developing a strong therapeutic alliance is possible during online  
35  
36 treatment(33) and that therapeutic alliance is often related to online treatment  
37  
38 outcomes(39), but not always (33). More research is needed to further examine the  
39  
40 interrelations of the quality of client-therapist relationship, drop-out, and treatment  
41  
42 outcomes in online CBT.  
43  
44  
45  
46  
47  
48  
49  
50

### 51 *Study objectives*

52  
53  
54 Our first aim is to examine the effectiveness of online CBT (vs. a waiting list control  
55  
56 condition) in reducing symptom levels of PCBD, PTSD, and depression in people bereaved by  
57  
58 a traffic accident. We expect that participants assigned to the online CBT condition will show  
59  
60

1  
2  
3 larger reductions in symptom levels of PCBD, PTSD, and depression compared with waitlist  
4  
5 controls at post-treatment assessments (Hypothesis 1).  
6  
7

8  
9 Our second aim is to explore correlates of change. Based on prior research and  
10 theories(12,16,19), we expect that reductions in negative cognitions, avoidance behaviors,  
11 state anger, a sense of unrealness, and improvement in self-efficacy are related to  
12 reductions in PCBD, PTSD, and depression levels in online CBT (Hypothesis 2a). Additionally,  
13 we aim to explore whether background characteristics (i.e., gender, age, and educational  
14 level, kinship to the deceased, and time since loss) and accident-related stressors (i.e., single  
15 vs. multiple loss, witnessing the accident, and status of legal trial) are related to treatment  
16 effects (Hypothesis 2b). We have no specific expectations regarding these associations  
17 because prior treatment studies in bereaved people showed inconsistent results(24,25,40).  
18 However, based on clinical experience, we expect that accident-related stressors are  
19 associated with treatment effects, such that multiple loss, witnessing the accident, and on-  
20 going legal trial negatively impact treatment effects.  
21  
22  
23  
24  
25  
26  
27  
28  
29  
30  
31  
32  
33  
34  
35  
36  
37  
38

39 Our third aim is to explore the associations between quality of the therapeutic  
40 alliance and drop-out rates and treatment outcomes. We expect that a stronger therapeutic  
41 alliance is related to lower dropout rates and better treatment outcomes.  
42  
43  
44  
45  
46

## 47 **Methods and analysis**

### 48 **Design**

49  
50  
51 A two-arm (online CBT vs. waiting list) multi-centre open label parallel RCT will be  
52 conducted. Randomization will take place after the participant is screened for eligibility-  
53 based inclusion criteria (described below). A random number generator ([www.random.org](http://www.random.org))  
54  
55  
56  
57  
58  
59  
60

1  
2  
3 will be used by a blinded independent researcher, to perform the blocking randomization  
4  
5 procedure. An allocation ratio of 1:1 will be applied.  
6  
7

8  
9 Participants allocated to the online CBT condition receive treatment within one week  
10  
11 after allocation. All participants will be asked to fill in questionnaires (described below) at  
12  
13 baseline (T1), 12 weeks post-allocation (T2 for the intervention condition and T1a for waitlist  
14  
15 controls), and 20 weeks post-allocation (T3 for the intervention condition and T1b for  
16  
17 waitlist controls). For participants in the waiting list control group, at the end of the 20-week  
18  
19 waiting period after which they will receive online CBT, they will be asked to fill in T2 and T3  
20  
21 12 and 20 weeks after starting treatment, respectively (see Figure 1). A link to online  
22  
23 questionnaires will be sent to the participants by a non-blinded member of the research  
24  
25 team at each time-point. A waitlist control group (instead of a no treatment control group) is  
26  
27 chosen to increase the likelihood of continued study participation by guaranteeing that all  
28  
29 participants receive treatment. Furthermore, the inclusion of a waiting list control group  
30  
31 allows a treatment versus no treatment comparison, that will provide knowledge about the  
32  
33 effects of treatment relative to natural recovery from loss.  
34  
35  
36  
37  
38  
39  
40

41 In line with prior treatment studies from our research group(40,41), the treatment is  
42  
43 guided by licensed and registered psychologists who are a member of our Traumatic Loss  
44  
45 Network (i.e., an informal national network of trauma and grief therapists that are involved  
46  
47 in research projects of our research group). In total six therapists (including authors PB and  
48  
49 JdK who are registered clinical psychologists) will guide the participants online; participants  
50  
51 will receive feedback from the same therapist each time. The therapists will receive a  
52  
53 training, provided by LL, PB, and JdK, on the use of the treatment protocol of this  
54  
55 intervention study. In preparation for the training, therapists read all treatment materials  
56  
57  
58  
59  
60

1  
2  
3 and a selection of grief treatment literature. Instructions about the use of the online  
4  
5 treatment interface will be given by its developers. During a 5-hour face-to-face group  
6  
7 meeting the rationale of the online treatment will be explained and research procedures will  
8  
9 be discussed. In a 2-hour online video-meeting outstanding questions regarding the  
10  
11 treatment and the research project will be answered. Supervision (by telephone or mail) by  
12  
13 PB and JdK is possible on request, for instance when therapists encounter difficulties in  
14  
15 treatment. Therapists will be contacted by a member of the research team by phone or  
16  
17 email biweekly to monitor treatment progress and protocol adherence. Treatment costs will  
18  
19 be reimbursed.  
20  
21  
22  
23  
24  
25

26 ==Figure 1 about here==  
27  
28

## 29 **Participants**

30  
31  
32 This RCT is part of a larger on-going research project (the “TrafVic-project”) examining the  
33  
34 psychological impact of, and care after, the death of a loved one due to a traffic accident.  
35  
36 We expect to recruit the majority of the participants via a survey that started in December  
37  
38 2018 and included the following question: “In this study we would like to offer psychological  
39  
40 help to persons who experience emotional problems. May we approach you with more  
41  
42 information about this offer, if your answers to this questionnaire show that you experience  
43  
44 emotional problems?” Those who answered ‘yes’ will be sent a letter with information about  
45  
46 the intervention, the treatment study, and an informed consent form (see Supplementary  
47  
48 Materials). A Dutch website ([www.rounnaverkeersongeval.nl](http://www.rounnaverkeersongeval.nl)) has been developed so that  
49  
50 potential participants can read information about the research and treatment. People who  
51  
52 are interested can also sign up for the study via this website. Recruitment for this RCT had  
53  
54 not started at the time of submission of this manuscript.  
55  
56  
57  
58  
59  
60

1  
2  
3 To be eligible for study participation, the person must 1) be a family member,  
4 spouse, or friend of a person who died due to a traffic accident at least one year earlier, 2)  
5 be  $\geq 18$  years of age, and 3) meet DSM-5 criteria for PCBD and/or PTSD and/or experience  
6 clinically relevant depression, based on questionnaire scores (see below for more details).  
7  
8 People are excluded when they do not master the Dutch language or have no Internet  
9 access.  
10  
11  
12  
13  
14  
15  
16  
17

### 18 **Sample size**

19  
20  
21 To test our primary hypothesis (Hypothesis 1), a test for each outcome separately (PCBD,  
22 PTSD, and depression) will be conducted to assess the effects of online CBT vs. waitlist  
23 controls. To find a difference between two groups (online CBT vs. waitlist controls) of at least  
24 a medium effect size ( $f = 0.25$ ; based on prior research(22,28,40)) with a power of 80%, an  $\alpha$   
25 of 0.017 (corrected for multiple testing, i.e.,  $0.05/3$ , as there are three primary outcome  
26 measures (PCBD, PTSD, and depression)), and a strong association ( $r = .50$ ) between the pre-  
27 and post-assessment, a sample size of 23 per condition is sufficient. Taking into account an  
28 average dropout rate of 19% (22), a total sample size of 55 (46+9) is required to test  
29 Hypothesis 1.  
30  
31  
32  
33  
34  
35  
36  
37  
38  
39  
40  
41  
42  
43  
44

45 Because our data are nested (repeated measures) (level 1) within individuals (level  
46 2), and possibly within families sharing the same household (level 3), multi-level modeling  
47 will be performed to test hypothesis 1. Conducting a power analysis within a multi-level  
48 framework is not feasible for various reasons(42). Our power analysis is therefore based on a  
49 repeated measures ANOVA.  
50  
51  
52  
53  
54  
55  
56

### 57 **Intervention**



1  
2  
3 Online CBT will consist of eight one-on-one sessions, called lessons, offered within a  
4  
5 timeframe of 12 weeks. Eight sessions have shown to be sufficient to yield clinically relevant  
6  
7 effects in prior research(40). Following Dutch guidelines for grief-specific CBT(42), central  
8  
9 components of the treatment are exposure, cognitive restructuring, and behavioral  
10  
11 activation. In the first session, psychoeducation is offered, including information about  
12  
13 possible emotional reactions to the death of a loved one in a traffic accident and processes  
14  
15 that might foster or hamper recovery. A rationale for the CBT interventions is provided.  
16  
17  
18  
19  
20

21 Then, session 2, 3, and 4 are focused on exposure; the circumstances and story of the  
22  
23 loss are presented in detail, and the participant is encouraged to confront stimuli that s/he  
24  
25 tends to avoid. Exposure is conducted by imaginary exposure assignments and by writing  
26  
27 assignment that have proven to be effective in prior research(30). These writing assignments  
28  
29 are focused on writing a detailed narrative of the loss and its circumstances.  
30  
31  
32  
33

34 The next sessions (5 and 6) focus on identifying and changing negative cognitions  
35  
36 that hamper adjustment (i.e., cognitive restructuring); specific attention is paid to cognitions  
37  
38 connected with responsibility/guilt and anger that may be experienced following the  
39  
40 accidental death(10). Cognitive restructuring assignments are provided to gain an alternative  
41  
42 perspective on negative thoughts about the self, life, the future, through 1) psycho-  
43  
44 education about common unhelpful thoughts, 2) identifying one's own unhelpful thoughts,  
45  
46 and 3) challenging these thoughts. Participants are instructed to undertake these three steps  
47  
48 by providing a daily description of i) an emotional moment/event, ii) their thoughts during  
49  
50 this event, iii) their feelings (and intensity of these feelings on a scale of 1 through 10), iv)  
51  
52 their behavior, v) evaluation of their thoughts), and vi) alternative helpful thoughts.  
53  
54  
55  
56  
57  
58  
59  
60

1  
2  
3 In session 7 and 8, participants are encouraged to re-engage in previously valued  
4 social, recreational, and occupational activities in order to facilitate the process of  
5 adjustment. Behavioral activation assignments are focused on writing about valued activities  
6 and making plans to achieve valued goals. Session 8 is also focused on what the participant  
7 has learned and how to deal with difficulties in the future.  
8  
9

10  
11  
12  
13  
14  
15  
16 All information and assignments are presented in an online framework, offered via a  
17 secure website. Participants receive online written information that consists of  
18 psychoeducation, information about treatment content and structure, and homework  
19 assignments. As part of the online treatment, participants also listen to a video-therapist  
20 verbally sharing parts of information that are also presented in text. The video-therapists are  
21 two therapists from the Traumatic Loss Network; one male and one female and both middle-  
22 aged. At the start of the treatment the video-therapists introduce themselves and the  
23 participant is asked to select one of the video-therapists. The information shared by these  
24 video-therapists are recorded in video-messages in which they read parts of the texts out  
25 loud. Each participant therefore receives the same information from a video-therapist.  
26 Direct contact with the video-therapist is not possible.  
27  
28  
29  
30  
31  
32  
33  
34  
35  
36  
37  
38  
39  
40  
41  
42  
43

44 Participants receive weekly asynchronous written feedback from one online therapist  
45 on each assignment that they complete online. As mentioned earlier, six online therapists  
46 are trained to guide the participants. The online therapists are instructed to contact the  
47 participant twice a week; once to encourage participants to log in and complete assignments  
48 and once to provide feedback on assignments. In total, they spend 30 minutes per week on  
49 reading assignments and providing feedback. Moreover, participants are encouraged to ask  
50  
51  
52  
53  
54  
55  
56  
57  
58  
59  
60

1  
2  
3 a family member or friend to support them during treatment. This support figure is then  
4  
5 informed about the treatment through written information in an online framework.  
6  
7

## 8 9 **Measures**

### 10 11 *Primary outcome measures*

12  
13  
14  
15 PCBD will be assessed with the Traumatic Grief Inventory-Self Report (TGI-SR)(43). The TGI-  
16  
17 SR consists of 18 items on a 5-point Likert scale ranging from 1 = never through 5 = always.  
18  
19 Four items tapping disturbed grief criteria according to the 11th edition of the International  
20  
21 Classification of Diseases were added(44). An example of an item is: "I found it difficult to  
22  
23 trust others". The instruction of the original questionnaire was altered from referring to "the  
24  
25 death of your loved one" to "the death of your loved one(s) due to a traffic accident".  
26  
27  
28  
29 Psychometric properties of the TGI-SR are adequate(43,45). Participants are considered to  
30  
31 meet criteria for DSM-5 PCBD(4) when they score at least 3 ("Sometimes") on at least 1  
32  
33 criterion B symptom (Item 1, item 2, item 3, and item 14), at least 6 criterion C symptoms  
34  
35 (item 4 up to 11, and item 15 up to 18), and the criterion D symptom (item 13).  
36  
37  
38  
39

40  
41 PTSD will be assessed with the PTSD Checklist for DSM-5 (PCL-5)(46) (Dutch version:  
42  
43 (47)). Participants rate how often they were bothered by each symptom (e.g., "In the past  
44  
45 month, how much were you bothered by trouble remembering important parts of the  
46  
47 accident?") on 5-point Likert scales (0 = not at all and 4 = extremely). The instruction and the  
48  
49 items of the original questionnaire are altered from referring to the "stressful event" to the  
50  
51 "the death of your loved one(s) due to a traffic accident". The PCL-5 has shown to be reliable  
52  
53 and valid(46). Participants meet the criteria for DSM-5 PTSD(4) when they score at least 2  
54  
55 ("Moderately") on 1 criterion B item (items 1-5), 1 criterion C item (items 6-7), 2 criterion D  
56  
57 items (items 8-14), and 2 criterion E items (items 15-20).  
58  
59  
60

1  
2  
3 Depression symptom levels are assessed with the depression subscale of the HADS-  
4 D(48). The HADS-D consists of 7 items (e.g., “I still enjoy the thing I used to do”) rated on 4-  
5 point scores ranging from 0 (e.g., “Hardly at all”) through 3 (e.g., “Definitely as much”). The  
6 Dutch HADS-D is a reliable and valid screening tool for depression(49). A cut-off score of  $\geq 8$   
7 is used as indicator for clinically relevant depression(48).  
8  
9

### 16 *Secondary outcome measures*

17  
18  
19 Negative grief-related cognitions are assessed with 18 items from the Grief  
20 Cognitions Questionnaire (GCQ)(14). Participants are asked to rate their agreement with  
21 each item (e.g., “Since [-] is dead, I feel less worthy”) on 6-point scales varying from 0 =  
22 disagree strongly through 5 = agree strongly. The psychometric properties have been  
23 positively evaluated in prior research(14).  
24  
25  
26  
27  
28  
29  
30

31  
32 Avoidance is measured with the Depressive and Anxious Avoidance in Prolonged  
33 Grief Questionnaire (DAAPGQ)(50). The depressive avoidance subscale consists of 5 items  
34 (e.g. ‘Since [-] is dead, I do much less of the things that I used to enjoy.’) and the anxious  
35 avoidance subscale consists of 4 items (e.g., ‘I avoid to dwell on painful thoughts and  
36 memories connected to his/her death.’). Participants answer each item on an 8-point scale  
37 with 0 = not at all true for me, and 7 = completely true for me. The DAAPGQ has adequate  
38 psychometric properties(50).  
39  
40  
41  
42  
43  
44  
45  
46  
47  
48

49  
50 State anger is assessed with the 15-item state anger subscale of the State-Trait Anger  
51 Expression Inventory-2 (STAXI-2)(51) (Dutch version:(52)). Participants are asked to rate on  
52 4-point Likert scales (1 = not at all and 4 = extremely) how angry they feel right now (e.g., “I  
53 feel annoyed”). The STAXI-2 is a valid and reliable measure to assess state anger(52).  
54  
55  
56  
57  
58  
59  
60

1  
2  
3 A sense of unrealness is measured with the 5-item Experienced Unrealness Scale(17).  
4  
5 Participants are asked to rate their agreement with each item (e.g., “I still can hardly imagine  
6  
7 that [-] will never be here again”) on 8-point scales (0 = not at all true for me 7 = completely  
8  
9 true for me). This instrument demonstrated adequate psychometric properties(17).  
10  
11  
12

13  
14 Self-efficacy is assessed with the General Self-Efficacy Scale (GSES)(53). The GSES is a  
15  
16 10-item measure. Participants are asked to rate their agreement with each item (e.g., “I can  
17  
18 solve most problems if I invest the necessary effort.”) on a 4-point scale (1 = completely not  
19  
20 true, 4 = completely true). The GSES has shown excellent reliability and validity(53).  
21  
22  
23

24  
25 Quality of the therapeutic alliance is measured with the 12-item Work Alliance  
26  
27 Inventory-Short Form, Client Version and Therapist Version after session 4 (WAI-SF)(54)  
28  
29 (Dutch version:(55). The WAI-SF consists of 12 items (e.g., Client version: “We agree on what  
30  
31 is important for me to work on”, Therapist Version: “We are working towards mutually  
32  
33 agreed upon goals.”) that are rated on 5-point scales (1 = never and 5 = always). Higher total  
34  
35 scores indicate a higher quality of the therapeutic alliance as perceived by the participant  
36  
37 and therapist. The WAI-SF is a reliable and valid assessment tool(56).  
38  
39  
40  
41

#### 42 *Other measures*

43  
44

45  
46 Background characteristics (i.e., gender, age, and educational level, kinship to the deceased,  
47  
48 and time since loss) and accident-related stressors (i.e., single vs. multiple loss, witnessed  
49  
50 the accident, and status of legal trial) will be assessed with single items.  
51  
52  
53

54  
55 Participants are allowed to receive other forms of psychosocial, instrumental or legal  
56  
57 support during participation in the trial. Using a single question we will assess whether the  
58  
59 participants received other forms of psychosocial professional support. The following  
60

1  
2  
3 question will be used: “During the past 12 weeks/8 weeks (for T2 and T3, respectively) did  
4 you receive additional psychological professional support from a psychologist, therapist or  
5 psychiatrist other than the (online) therapist from the TrafVic-study?” We will also include  
6 two dichotomous items (yes/no) at T1 to assess psychological support received prior to  
7 participation in the study, namely: “Did you ever receive support from a psychologist,  
8 therapist or psychiatrist, for your own emotional/mental problems, prior to the loss of your  
9 loved one due to a traffic accident?” and “Did you ever receive support from a psychologist,  
10 therapist or psychiatrist, for your own emotional/mental problems, related to the loss of  
11 your loved one due to a traffic accident?”  
12  
13  
14  
15  
16  
17  
18  
19  
20  
21  
22  
23  
24  
25  
26  
27  
28

### 29 **Statistical analyses**

30  
31  
32 To examine the differences in reductions of symptom levels of PCBD, PTSD, and depression  
33 from pre- to post-treatment/waiting period between the conditions (online CBT vs. waitlist),  
34 three independent multi-level models will be built (Hypothesis 1). Symptom levels of PCBD,  
35 PTSD, and depression will consecutively be included as dependent variables and condition  
36 (online CBT vs. waitlist controls), time, and time x condition (interaction term) as predictor  
37 variables, taking into account that repeated observations (level 1) are nested within  
38 individuals (level 2), and within households (level 3; if applicable). Additionally, relevant  
39 background, loss-related variables, and use of co-interventions (yes/no) during participation  
40 in our study, will be included in the analysis as covariates. Deviance tests will be used to  
41 examine whether inclusion of these covariates improves model fit(57). Data of all  
42 participants entering the study will be included in all analyses (i.e., intention-to-treat  
43 analysis). Furthermore, percentages of people meeting diagnostic criteria for PCBD, PTSD,  
44  
45  
46  
47  
48  
49  
50  
51  
52  
53  
54  
55  
56  
57  
58  
59  
60

1  
2  
3 and clinically relevant depression will be calculated for each measurement occasion and  
4  
5 percentages of people reporting reliable change scores for each outcome measure, using a  
6  
7 formula from Jacobson and Truax(58, p. 14), will be reported.  
8  
9

10  
11 To examine to what extent symptom improvement after treatment is related to  
12  
13 improvement in possible correlates of change, residual gain scores will be calculated for all  
14  
15 outcome measures (i.e., PCBD, PTSD, and depression) and possible correlates of change (i.e.,  
16  
17 negative cognitions, avoidance behaviors, state anger, a sense of unrealness, and self-  
18  
19 efficacy). Following previous research (cf. (59)), residual gain scores will be calculated by  
20  
21 subtracting the standardized combined pre-treatment scores of both conditions (T1 data  
22  
23 from immediate treatment condition and T1b data from waitlist condition) multiplied by the  
24  
25 correlation coefficient between standardized combined pre-treatment scores and  
26  
27 standardized post-treatment (or follow-up) scores from standardized post-treatment (or  
28  
29 follow up) scores. To test hypothesis 2a, multiple regression analyses will be conducted to  
30  
31 examine the associations between residual gain scores of PCBD, PTSD, or depression and  
32  
33 residual gain scores of negative cognitions, avoidance behaviors, state anger, a sense of  
34  
35 unrealness, and self-efficacy.  
36  
37  
38  
39  
40  
41  
42  
43

44 To achieve research aim 2b, multiple regression analyses will be used to examine to  
45  
46 what extent residual gain scores of PCBD, PTSD, and depression varies as function of a)  
47  
48 background characteristics, including gender (male/female), age (in years), and educational  
49  
50 level (low/high), kinship to the deceased (child/spouse vs other), and time since loss (in  
51  
52 years) and b) accident-related stressors, including number of losses (single vs multiple),  
53  
54 witnessing the accident (yes/no), and status of legal trial (not applicable/on-  
55  
56  
57  
58  
59  
60

1  
2  
3 going/completed). Condition (intervention vs. waitlist controls) will be added as a covariate  
4  
5 to fulfill research aim 2a and 2b.  
6  
7

8  
9 To achieve the third research aim, a) differences in therapeutic alliance scores will be  
10  
11 assessed between people who completed and dropped out of treatment and b) multiple  
12  
13 regression analyses will be used to examine to what extent symptom improvement in PCBD,  
14  
15 PTSD, and depression is related to therapeutic alliance (from both participant and therapist  
16  
17 perspectives).  
18  
19

## 20 21 22 **Ethics and dissemination** 23

24  
25 This study has been approved by a local ethics committee (METc UMCG: ID number:  
26  
27 M20.252121). The study will be conducted according to the principles of the Declaration of  
28  
29 Helsinki (8th version, 2013) and in accordance with the Medical Research Involving Human  
30  
31 Subjects Act. Collected data will be handled confidentially, according to the EU General Data  
32  
33 Protection Regulation and the Dutch Act on Implementation of the General Data Protection  
34  
35 Regulation. Unidentifiable data from this trial will be stored in data repositories from the  
36  
37 University of Groningen and Utrecht University.  
38  
39  
40

41  
42  
43 Findings of this RCT will be disseminated among participants by means of a  
44  
45 newsletter. If shown to be effective, the online framework will be made publicly accessible,  
46  
47 so that it can benefit other bereaved people. Findings will also be disseminated among lay  
48  
49 people by uploading the newsletters on our website ([www.rouwnaverkeersongeval.nl](http://www.rouwnaverkeersongeval.nl)) and  
50  
51 through media performances. Our findings will be presented to our collaborators, including  
52  
53 non-governmental organizations and (peer-)support organizations for bereaved people.  
54  
55 Treatment materials will also be made available upon request. Lastly, colleagues will be  
56  
57  
58  
59  
60



1  
2  
3 informed about our findings during presentations at (inter)national conferences and  
4  
5 publications in scientific journals.  
6  
7

8  
9 **Patient and public involvement**

10  
11  
12 No patient involvement.  
13  
14  
15  
16  
17  
18  
19  
20  
21  
22  
23  
24  
25  
26  
27  
28  
29  
30  
31  
32  
33  
34  
35  
36  
37  
38  
39  
40  
41  
42  
43  
44  
45  
46  
47  
48  
49  
50  
51  
52  
53  
54  
55  
56  
57  
58  
59  
60

For peer review only

## Discussion

The relatively few RCTs among general bereaved people with elevated grief levels indicate that grief-specific CBT-based interventions yield the largest effects on post-loss mental health compared with a waiting list(21–24). RCTs evaluating face-to-face or online treatment effects for people with elevated mental health complaints after confrontation with sudden/violent losses are lacking, with the exception of two studies that compared face-to-face EMDR plus CBT against waitlist controls(40,59). Given that traumatically bereaved people are at risk for PCBD and comorbid PTSD and depression(8), it seems particularly relevant to develop evidence-based interventions for this population.

This will be the first RCT to examine the effectiveness of online CBT in a sample exclusively comprised of people who experienced a traumatic death. We are not able to test whether the online CBT has equal effects as face-to-face CBT. Nonetheless, the findings are expected to yield important insights in the effects of online CBT. In this RCT, the online treatment is designed to be as similar as possible to face-face CBT in terms of treatment content, treatment duration, and experience and training of therapists. When we find effect sizes for online CBT that are similar to effect sizes found in earlier studies for face-to-face CBT, delivering CBT online can be considered as supplement to face-to-face treatment, in particular when barriers to face-to-face treatments, such as waiting lists and travel expenses, are experienced.

We will also examine potential correlates of change. These analyses, examining the associations between reductions in symptoms levels and among others negative cognitions and avoidance behaviors, will provide insights in potential underlying therapeutic processes to foster recovery from traumatic loss. These insights are deemed important to design

1  
2  
3 treatments that more effectively target these correlates of change. We also expect to  
4  
5 improve our knowledge on for whom (e.g., women or people who are more remotely  
6  
7 bereaved) grief-specific CBT works best. Findings on these potential correlates of change are  
8  
9 necessary to improve treatments given that a maximum of 42% of bereaved people report  
10  
11 clinically relevant reductions in grief levels after treatment(21).  
12  
13  
14  
15

16  
17 Lastly, the role of therapeutic alliance on therapy outcomes will be explored. Prior  
18  
19 research in bereaved people has shown that greater therapeutic alliance, from the  
20  
21 perspective of the client, at week 4 of a face-to-face grief-specific treatment, was related to  
22  
23 greater reductions in grief levels. This therapeutic alliance-grief relationship was not  
24  
25 significant for a non-grief specific treatment(60). Our exploration of this association, from  
26  
27 the perspective of client *and* therapist, may for the first time shed light on therapeutic  
28  
29 processes in online CBT for traumatic grief.  
30  
31  
32  
33

34  
35 An anticipated limitation of our RCT is the self-selected sample. It is possible that  
36  
37 people who are more open towards innovative technology in general(61) and who received  
38  
39 support prior to the loss(32) are more likely to sign up for this study, limiting the  
40  
41 generalizability of findings emerging from this study. Due to the absence of an active control  
42  
43 group (e.g., face-to-face CBT) we are not able to test the effects of online CBT compared  
44  
45 with an alternative treatment. Furthermore, we will use self-report measures instead of  
46  
47 diagnostic interviews, which may increase the risk of overestimating symptom levels(62).  
48  
49

50  
51 Another potential limitation of this trial relates to the fact that the operationalization and  
52  
53 assessment of grief as a disorder is still under debate(63–65). For instance, PCBD, included as  
54  
55 “condition for further study” in the DSM-5, is likely to be changed in a revision of the DSM.  
56  
57 To maximize diagnostic compatibility, we added four items, corresponding to ICD-11 PGD  
58  
59  
60

1  
2  
3 criteria, to the TGI-SR, enabling operationalization of our primary outcome measure in terms  
4  
5 of diagnoses of pathological grief according to both the DSM-5 and the ICD-11.  
6  
7

8  
9 To conclude, this RCT will provide new insights in effectiveness of online CBT for  
10  
11 people who experience clinically relevant distress after bereavement due to a traffic  
12  
13 accident, as well as in potential correlates of therapeutic change. As trials to date have  
14  
15 primarily focused on effects of face-to-face treatment for non-traumatically bereaved  
16  
17 people, our findings are expected to provide a valuable addition to the knowledge base on  
18  
19 treating severely distressed bereaved people.  
20  
21  
22  
23  
24  
25  
26  
27  
28  
29  
30  
31  
32  
33  
34  
35  
36  
37  
38  
39  
40  
41  
42  
43  
44  
45  
46  
47  
48  
49  
50  
51  
52  
53  
54  
55  
56  
57  
58  
59  
60

## References

1. World Health Organization. The top 10 causes of death [Internet]. 2019 [geciteerd 14 oktober 2019]. Beschikbaar op: <https://www.who.int/news-room/fact-sheets/detail/the-top-10-causes-of-death>
2. Lundorff M, Holmgren H, Zachariae R, Farver-Vestergaard I, O'Connor M. Prevalence of prolonged grief disorder in adult bereavement: A systematic review and meta-analysis. *J Affect Disord.* 2017;212:138–49.
3. Onrust SA, Cuijpers P. Mood and anxiety disorders in widowhood: a systematic review. *Aging Ment Health.* 2006;10(4):327–34.
4. American Psychiatric Association. Diagnostic and statistical manual of mental disorders (5th ed.). Arlington, VA: American Psychiatric Publishing; 2013.
5. Boelen PA, van de Schoot R, van den Hout MA, de Keijser J, van den Bout J. Prolonged Grief Disorder, depression, and posttraumatic stress disorder are distinguishable syndromes. *J Affect Disord.* 2010;125(1–3):374–8.
6. Lenferink LIM, Nickerson A, de Keijser J, Smid GE, Boelen PA. Trajectories of grief, depression, and posttraumatic stress in disaster-bereaved people. *Depress Anxiety.* 2018;
7. Malgaroli M, Maccallum F, Bonanno GA. Symptoms of persistent complex bereavement disorder, depression, and PTSD in a conjugally bereaved sample: a network analysis. *Psychol Med.* 2018;48(14):2439–48.

- 1  
2  
3 8. Heeke C, Kampisiou C, Niemeyer H, Knaevelsrud C. A systematic review and meta-  
4  
5 analysis of correlates of prolonged grief disorder in adults exposed to violent loss. *Eur J*  
6  
7 *Psychotraumatology* [Internet]. 2019 [geciteerd 14 oktober 2019];10(1). Beschikbaar  
8  
9 op: <https://www.ncbi.nlm.nih.gov/pmc/articles/PMC6442112/>  
10  
11  
12
- 13  
14 9. Kristensen P, Weisæth L, Heir T. Bereavement and mental health after sudden and  
15  
16 violent losses: a review. *Psychiatry*. 2012;75(1):76–97.  
17  
18
- 19  
20 10. Eisma, M.C., de Keijser, J. Nabestaanden van verkeersongevallen. In: de Keijser, J.,  
21  
22 Boelen, P.A., Smid, G.E., redacteuren. *Handboek traumatische rouw*. Amsterdam:  
23  
24 Uitgeverij Boom; 2018. p. 104–16.  
25  
26
- 27  
28 11. Boelen PA, de Keijser J, Smid G. Cognitive–behavioral variables mediate the impact of  
29  
30 violent loss on post-loss psychopathology. *Psychol Trauma Theory Res Pract Policy*.  
31  
32 2015;7(4):382–90.  
33  
34
- 35  
36 12. Boelen PA, van den Hout MA, van den Bout J. A Cognitive-Behavioral Conceptualization  
37  
38 of Complicated Grief. *Clin Psychol Sci Pract*. 2006;13(2):109–28.  
39  
40
- 41  
42 13. Janoff-Bulman R. Assumptive worlds and the stress of traumatic events: Applications of  
43  
44 the schema construct. *Soc Cogn*. 1989;7(2):113–36.  
45  
46
- 47  
48 14. Boelen PA, Lensvelt-Mulders GJLM. Psychometric Properties of the Grief Cognitions  
49  
50 Questionnaire (GCQ). *J Psychopathol Behav Assess*. 2005;27(4):291–303.  
51  
52
- 53  
54 15. Foa EB, Riggs DS, Massie ED, Yarczower M. The impact of fear activation and anger on  
55  
56 the efficacy of exposure treatment for posttraumatic stress disorder. *Behav Ther*.  
57  
58 1995;26(3):487–99.  
59  
60

- 1  
2  
3 16. Tehrani, N. Road victim trauma: an investigation of the impact on the injured and  
4  
5 bereaved. *Couns Psychol Q.* 2004;17(4):361–73.  
6  
7
- 8  
9 17. Boelen PA. A Sense of ‘unrealness’ about the death of a loved-one: An exploratory  
10  
11 study of its role in emotional complications among bereaved individuals. *Appl Cogn*  
12  
13 *Psychol.* 2010;24(2):238–51.  
14  
15
- 16  
17 18. Boelen PA. “It feels as if she might return one day”: A sense of unrealness as a predictor  
18  
19 of bereavement-related emotional distress / “Tengo la sensación de que ella puede  
20  
21 volver algún día”: la sensación de irrealidad como un predictor del sufrimiento  
22  
23 emocional relacionado con la pérdida. *Estud Psicol.* 2017;38(3):734–51.  
24  
25
- 26  
27 19. Benight CC. Social cognitive theory of posttraumatic recovery: the role of perceived  
28  
29 self-efficacy. *Behav Res Ther.* 2004;42(10):1129–48.  
30  
31
- 32  
33 20. Smid GE, Kleber RJ, Rie SM de la, Bos JBA, Gersons BPR, Boelen PA. Brief Eclectic  
34  
35 Psychotherapy for Traumatic Grief (BEP-TG): toward integrated treatment of symptoms  
36  
37 related to traumatic loss. *Eur J Psychotraumatology.* 2015;6(1):27324.  
38  
39
- 40  
41 21. Boelen PA, Smid GE. Disturbed grief: prolonged grief disorder and persistent complex  
42  
43 bereavement disorder. *BMJ.* 2017;357:j2016.  
44  
45
- 46  
47 22. Currier JM, Holland JM, Neimeyer RA. Do CBT-Based Interventions Alleviate Distress  
48  
49 Following Bereavement? A Review of the Current Evidence. *International Journal of*  
50  
51 *Cognitive Therapy.* 2010;3:77–93.  
52  
53
- 54  
55 23. Doering BK, Eisma MC. Treatment for complicated grief: state of the science and ways  
56  
57 forward. *Curr Opin Psychiatry.* 2016;29(5):286–91.  
58  
59  
60

- 1  
2  
3 24. Johannsen M, Damholdt MF, Zachariae R, Lundorff M, Farver-Vestergaard I, O'Connor  
4  
5 M. Psychological interventions for grief in adults: A systematic review and meta-  
6  
7 analysis of randomized controlled trials. *J Affect Disord.* 2019;253:69–86.  
8  
9
- 10  
11 25. Boelen PA, Keijser J de, Hout MA van den, Bout J van den. Factors associated with  
12  
13 outcome of cognitive-behavioural therapy for complicated grief: A preliminary study.  
14  
15 *Clin Psychol Psychother.* 2011;18(4):284–91.  
16  
17
- 18  
19 26. Bryant RA, Kenny L, Joscelyne A, Rawson N, Maccallum F, Cahill C, e.a. Predictors of  
20  
21 treatment response for cognitive behaviour therapy for prolonged grief disorder. *Eur J*  
22  
23 *Psychotraumatology* [Internet]. 2019 [geciteerd 13 oktober 2019];8(6). Beschikbaar op:  
24  
25 <https://www.ncbi.nlm.nih.gov/pmc/articles/PMC6383610/>  
26  
27
- 28  
29 27. Linde K, Treml J, Steinig J, Nagl M, Kersting A. Grief interventions for people bereaved  
30  
31 by suicide: A systematic review. *PloS One.* 2017;12(6):e0179496.  
32  
33
- 34  
35 28. Eisma MC, Boelen PA, van den Bout J, Stroebe W, Schut HAW, Lancee J, e.a. Internet-  
36  
37 Based Exposure and Behavioral Activation for Complicated Grief and Rumination: A  
38  
39 Randomized Controlled Trial. *Behav Ther.* 2015;46(6):729–48.  
40  
41
- 42  
43 29. Kersting A, Dölemeyer R, Steinig J, Walter F, Kroker K, Baust K, e.a. Brief Internet-based  
44  
45 intervention reduces posttraumatic stress and prolonged grief in parents after the loss  
46  
47 of a child during pregnancy: a randomized controlled trial. *Psychother Psychosom.*  
48  
49 2013;82(6):372–81.  
50  
51
- 52  
53 30. Wagner B, Knaevelsrud C, Maercker A. Internet-based cognitive-behavioral therapy for  
54  
55 complicated grief: a randomized controlled trial. *Death Stud.* 2006;30(5):429–53.  
56  
57  
58  
59  
60



- 1  
2  
3 31. Baumeister H, Reichler L, Munzinger M, Lin J. The impact of guidance on Internet-based  
4  
5 mental health interventions — A systematic review. *Internet Interv.* 2014;1(4):205–15.  
6  
7
- 8  
9 32. Lichtenthal WG, Corner GW, Sweeney CR, Wiener L, Roberts KE, Baser RE, e.a. Mental  
10  
11 Health Services for Parents Who Lost a Child to Cancer: If We Build Them, Will They  
12  
13 Come? *J Clin Oncol Off J Am Soc Clin Oncol.* 2015;33(20):2246–53.  
14  
15
- 16  
17 33. Andersson G, Titov N. Advantages and limitations of Internet-based interventions for  
18  
19 common mental disorders. *World Psychiatry.* 2014;13(1):4–11.  
20  
21
- 22  
23 34. Eisma MC, Boelen PA, Lenferink LIM. Prolonged grief disorder following the Coronavirus  
24  
25 (COVID-19) pandemic. *Psychiatry Res.* 2020;288:113031.  
26  
27
- 28  
29 35. Melville KM, Casey LM, Kavanagh DJ. Dropout from Internet-based treatment for  
30  
31 psychological disorders. *Br J Clin Psychol.* 2010;49(Pt 4):455–71.  
32  
33
- 34  
35 36. Pihlaja S, Stenberg J-H, Joutsenniemi K, Mehik H, Ritola V, Joffe G. Therapeutic alliance  
36  
37 in guided internet therapy programs for depression and anxiety disorders - A  
38  
39 systematic review. *Internet Interv.* 2018;11:1–10.  
40  
41
- 42  
43 37. Bordin ES. Theory and research on the therapeutic working alliance: New directions. In:  
44  
45 *The working alliance: Theory, research, and practice.* Oxford, England: John Wiley &  
46  
47 Sons; 1994. p. 13–37. (Wiley series on personality processes).  
48  
49
- 50  
51 38. Cook JE, Doyle C. Working alliance in online therapy as compared to face-to-face  
52  
53 therapy: preliminary results. *Cyberpsychology Behav Impact Internet Multimed Virtual*  
54  
55 *Real Behav Soc.* 2002;5(2):95–105.  
56  
57  
58  
59  
60

- 1  
2  
3 39. Sucala M, Schnur JB, Constantino MJ, Miller SJ, Brackman EH, Montgomery GH. The  
4  
5 therapeutic relationship in e-therapy for mental health: A systematic review. *J Med*  
6  
7 *Internet Res.* 2012;14(4):e110.  
8  
9  
10  
11 40. van Denderen M, de Keijser J, Stewart R, Boelen PA. Treating complicated grief and  
12  
13 posttraumatic stress in homicidally bereaved individuals: A randomized controlled trial.  
14  
15 *Clin Psychol Psychother.* 2018;  
16  
17  
18  
19 41. Lenferink LIM, de Keijser J, Wessel I, Boelen PA. Cognitive behavioural therapy and  
20  
21 mindfulness for relatives of missing persons: A pilot study. *Pilot Feasibility Stud.*  
22  
23 2019;5(1):93.  
24  
25  
26  
27 42. Boelen PA, Bout J van den. Protocollaire behandeling van persisterende complexe  
28  
29 rouwstoornis. In: Keijsers, G., Minnen, A. van, Verbraak, M., Hoogduin, K., Emmelkamp,  
30  
31 P., redacteuren. *Protocollaire behandelingen voor volwassenen met psychische*  
32  
33 *klachten.* 1ste dr. Amsterdam: Boom; 2017.  
34  
35  
36  
37  
38 43. Boelen PA, Smid GE. The Traumatic Grief Inventory Self-Report Version (TGI-SR):  
39  
40 Introduction and Preliminary Psychometric Evaluation. *J Loss Trauma.* 2017;22(3):196–  
41  
42 212.  
43  
44  
45  
46 44. World Health Organization. ICD-11. Prolonged Grief Disorder Criteria [Internet]. 2018  
47  
48 [geciteerd 14 oktober 2019]. Beschikbaar op: <https://icd.who.int/browse11/l->  
49  
50 [m/en#/http://id.who.int/icd/entity/1183832314](https://icd.who.int/browse11/l-m/en#/http://id.who.int/icd/entity/1183832314)  
51  
52  
53  
54  
55  
56  
57  
58  
59  
60

- 1  
2  
3 45. Boelen PA, Djelantik AAAMJ, de Keijser J, Lenferink LIM, Smid GE. Further validation of  
4  
5 the Traumatic Grief Inventory-Self Report (TGI-SR): A measure of persistent complex  
6  
7 bereavement disorder and prolonged grief disorder. *Death Stud.* 2019;43(6):351–64.  
8  
9  
10  
11 46. Blevins CA, Weathers FW, Davis MT, Witte TK, Domino JL. The Posttraumatic Stress  
12  
13 Disorder Checklist for DSM-5 (PCL-5): Development and Initial Psychometric Evaluation.  
14  
15 *J Trauma Stress.* 2015;28(6):489–98.  
16  
17  
18  
19 47. Boeschoten, M.A., Bakker, A., Jongedijk, R.A., Olff, M. PTSS checklist voor de DSM-5  
20  
21 (PCL-5). Diemen: Arq Nationaal Psychotrauma Centrum; 2014.  
22  
23  
24  
25 48. Zigmond AS, Snaith RP. The hospital anxiety and depression scale. *Acta Psychiatr Scand.*  
26  
27 1983;67(6):361–70.  
28  
29  
30  
31 49. Spinhoven PH, Ormel J, Sloekers PPA, Kempen GIJM. A validation study of the Hospital  
32  
33 Anxiety and Depression scale (HADS) in different groups of Dutch subjects. *Psychol*  
34  
35 *Med.* 1997;27(2):363–70.  
36  
37  
38  
39 50. Boelen PA, van den Bout J. Anxious and depressive avoidance and symptoms of  
40  
41 prolonged grief, depression, and post-traumatic stress disorder. *Psychol Belg.*  
42  
43 2010;50(1–2):49–67.  
44  
45  
46  
47 51. Spielberger, C.D. State-Trait Anger Expression Inventory-2. *Psychological Assessment*  
48  
49 *Resources;* 1999.  
50  
51  
52  
53 52. Lievaart M, Franken IHA, Hovens JE. Anger Assessment in Clinical and Nonclinical  
54  
55 Populations: Further Validation of the State-Trait Anger Expression Inventory-2. *J Clin*  
56  
57 *Psychol.* 2016;72(3):263–78.  
58  
59  
60

- 1  
2  
3 53. Schwarzer, R., Jerusalem, M. Generalized self-efficacy scale. In: Weinman, J., Wright, S.,  
4  
5 Johnston, M., redacteurs. Measures in health psychology: A user's portfolio Causal  
6  
7 and control beliefs. Windsor, UK: Nfer-Nelson; 1995. p. 35–7.  
8  
9  
10  
11 54. Horvath AO, Greenberg LS. Development and validation of the Working Alliance  
12  
13 Inventory. *J Couns Psychol.* 1989;36(2):223–33.  
14  
15  
16  
17 55. Vertommen, H., Vervaeke, G. Nederlandstalige experimentele vertaling van de Working  
18  
19 Alliance Inventory van Horvath en Greenberg. Leuven: KU; 1990.  
20  
21  
22  
23 56. Munder T, Wilmers F, Leonhart R, Linster HW, Barth J. Working Alliance Inventory-Short  
24  
25 Revised (WAI-SR): psychometric properties in outpatients and inpatients. *Clin Psychol*  
26  
27 *Psychother.* 2010;17(3):231–9.  
28  
29  
30  
31 57. Snijders, T.A.B., Bosker, R.J. Deviance tests. In: Snijders, T.A.B., Bosker, R.J.,  
32  
33 redacteurs. Multilevel analysis. London: SAGE Publications Ltd; 2012. p. 97–8.  
34  
35  
36  
37 58. Jacobson NS, Truax P. Clinical significance: A statistical approach to defining meaningful  
38  
39 change in psychotherapy research. *J Consult Clin Psychol.* 1991;59(1):12–9.  
40  
41  
42  
43 59. Lenferink LIM, de Keijser J, Smid GE, Boelen PA. Cognitive therapy and EMDR for  
44  
45 reducing psychopathology in bereaved people after the MH17 plane crash: Findings  
46  
47 from a randomized controlled trial. *Traumatology.* 2020;  
48  
49  
50  
51 60. Glickman K, Shear, K.M., Wall MM. Therapeutic Alliance and Outcome in Complicated  
52  
53 Grief Treatment. *Int J Cogn Ther.* 2018;11(2):222–33.  
54  
55  
56  
57 61. Arjadi R, Nauta MH, Bockting CLH. Acceptability of internet-based interventions for  
58  
59 depression in Indonesia. *Internet Interv.* 2018;13:8–15.  
60

- 1  
2  
3 62. Lim GY, Tam WW, Lu Y, Ho CS, Zhang MW, Ho RC. Prevalence of Depression in the  
4  
5 Community from 30 Countries between 1994 and 2014. *Sci Rep*. 2018;8(1):2861.  
6  
7  
8  
9 63. Lenferink, L.I.M., Boelen, P.A., Smid, G.E., Paap, M.C.S. The importance of harmonising  
10  
11 diagnostic criteria sets for pathological grief. *British Journal of Psychiatry*. in press;  
12  
13  
14  
15 64. Maciejewski PK, Prigerson HG. Prolonged, but not complicated, grief is a mental  
16  
17 disorder. *Br J Psychiatry*. 2017;211(4):189–91.  
18  
19  
20  
21 65. Wakefield JC. Should prolonged grief be reclassified as a mental disorder in DSM-5?:  
22  
23 reconsidering the empirical and conceptual arguments for complicated grief disorder. *J*  
24  
25 *Nerv Ment Dis*. 2012;200(6):499–511.  
26  
27  
28  
29  
30  
31  
32  
33

### 34 **Authors' contributions**

35  
36 JdK is principal investigator. LL is executive researcher. JdK, PB, ME, and GS are grant  
37  
38 holders. LL developed the study design and wrote the ethics proposal and drafts of the  
39  
40 manuscript. JdK, ME, GS, and PB read, revised, and approved the drafts of the study design,  
41  
42 ethics proposal, and the manuscript.  
43  
44  
45  
46

### 47 **Funding statement**

48  
49 Fund Victim Support subsidized this work.  
50  
51

### 52 **Competing Interests Statement**

53  
54  
55  
56 All authors declare to have no competing interests.  
57  
58  
59  
60

1  
2  
3 **Figure caption/legend**  
4

5 **Figure 1.** Design of RCT  
6

7  
8 *Note.* CBT = cognitive behavioral therapy  
9

10  
11  
12  
13  
14  
15  
16  
17  
18  
19  
20  
21  
22  
23  
24  
25  
26  
27  
28  
29  
30  
31  
32  
33  
34  
35  
36  
37  
38  
39  
40  
41  
42  
43  
44  
45  
46  
47  
48  
49  
50  
51  
52  
53  
54  
55  
56  
57  
58  
59  
60

For peer review only

1  
2  
3  
4  
5  
6  
7  
8  
9  
10  
11  
12  
13  
14  
15  
16  
17  
18  
19  
20  
21  
22  
23  
24  
25  
26  
27  
28  
29  
30  
31  
32  
33  
34  
35  
36  
37  
38  
39  
40  
41  
42  
43  
44  
45  
46  
47  
48  
49  
50  
51  
52  
53  
54  
55  
56  
57  
58  
59  
60

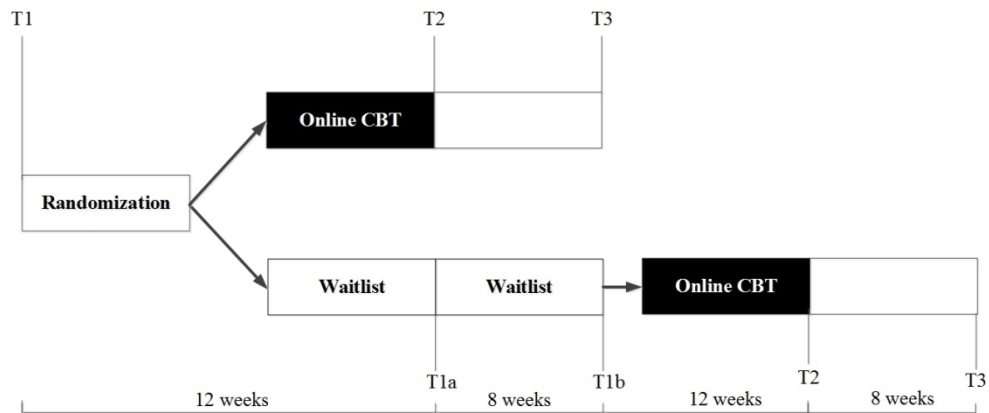

Figure 1. Design of RCT

356x148mm (96 x 96 DPI)

## Supplementary File

### Information for participants

Subject: Participation in study on the treatment of grief after a traffic accident

Dear sir/madam,

We ask you to take part in a scientific study. This participation is voluntary. In order to take part we do need your permission. You receive this information because you filled in a questionnaire some time ago, mapping the emotional consequences of the death of a loved one due to a traffic accident. You have indicated that you may be interested in taking part in a follow-up study exploring the effects of a treatment to learn to cope better with the death of your loved one.

Before you decide whether you want to take part in this study, you receive an explanation of what the study entails. Read this information carefully and ask the researcher to explain if you have questions.

#### 1. General Information

This study is conducted by the University of Groningen, Utrecht University and Stichting Centrum '45. The study is financed by the Fonds Slachtofferhulp (Victim Support Fund). The study consists of participation in an online psychological treatment. The treatment is provided by therapists in various practices across the Netherlands. The medical-ethical review committee of the Universitair Medisch Centrum Groningen (Academic Medical Centre Groningen) has approved this study.

#### 2. Purpose of the study

Those left behind after a traffic accident often indicate that the help provided does not sufficiently connect to their experiences. Therefore a treatment has been developed that is specifically intended for the partner, relatives and friends of someone who died due to a traffic accident. You can discuss with the therapist how you are coping with the loss and what the consequences of this loss are in your life. The aim of the treatment is to cope better with the loss. The treatment is part of a scientific study. The purpose of the study is to explore whether treatment leads to a reduction in emotional problems for those who lost someone due to a traffic accident.

#### 3. Background of the study

During the treatment cognitive behavioural therapy will be used. Previous research has shown that cognitive behavioural therapy is the most effective treatment for reducing emotional problems after the loss of a loved one due to a natural cause (for instance illness). Cognitive behavioural therapy is mainly applied during individual sessions with a therapist (face-to-face treatment). Research has shown that cognitive behavioural therapy, offered via the internet (online treatment), also seems to be suitable for reducing problems after a natural death. More research is needed to find out whether this online version of cognitive behavioural therapy is also suitable for those who lost someone due to a traffic accident. The purpose of this study is to find out whether online cognitive behavioural therapy is accompanied by a reduction of emotional problems after the death of a loved one due to a traffic accident.

The online treatment is provided individually and consists of eight modules which you go through in twelve weeks. You will then have online contact with a therapist who will guide you during the treatment. In the Netherlands, a network of therapists has been trained in the online treatment of people



1  
2  
3 who lost someone due to a traffic accident. The therapists work at several treatment centres. The online  
4 treatment is offered by Therapieland. Therapieland is a provider of psychological care via the internet.  
5  
6

#### 7 **4. What participation entails**

8 If you take part, this will take at least 20 weeks in total for you.  
9

##### 10 *Screening*

11 First we will determine whether you can take part. You will be asked to fill in a questionnaire. The  
12 questionnaire contains questions about emotional problems you may experience in response to the  
13 passing away of your loved one due to a traffic accident. Also, questions are asked about previous  
14 psychological help you may have received. The questionnaire is used to get a picture of the degree to  
15 which you experience emotional problems.  
16

17 If your completed questionnaire shows that you experience relatively few emotional problems, you  
18 cannot take part in the study. You also cannot take part in the study if you have no access to the internet.  
19 If your answers show that the treatment offered is not suitable for you, an alternative treatment will be  
20 looked for in consultation with you.  
21

22 It is possible that you filled out a questionnaire on this topic before. As problems can change over time,  
23 we ask you to fill in a questionnaire once more. In this way we get a picture of the problems you are  
24 experiencing at the moment.  
25

##### 26 *Treatment*

27 In order to be able to determine the effect of the treatment, participants are assigned to one of two  
28 groups. The first group will start with the online treatment as soon as possible after registration. The  
29 second group will start with the online treatment after a waiting period of 20 weeks. By adding a waitlist  
30 group it can be determined that a reduction of problems is actually the result of the treatment, and not  
31 of the passage of time. Which group you are assigned to will be determined by drawing lots. You and  
32 we do not have any influence on the draw. We will let you know when your treatment starts.  
33  
34  
35

##### 36 *Measurements*

37 Before the treatment can start, you will be asked to fill in a questionnaire. This questionnaire will focus  
38 on the problems you experience. We map these in order to be able to determine whether the treatment  
39 might help you.  
40

41 The therapist who will guide your online treatment will be informed of the results of this questionnaire  
42 beforehand. In order to determine to what extent the treatment helps you, we ask you to fill in a  
43 questionnaire not only beforehand, but also once during the treatment, after the last treatment session,  
44 and 8 weeks after the treatment. People assigned to the waiting group will be asked to fill in an additional  
45 questionnaire after 12 weeks and 20 weeks of waiting. In this way it can be determined whether the  
46 treatment has been effective and what the short and long term effects of the treatment are. The filling  
47 in will take approximately 10 to 30 minutes per measurement.  
48  
49  
50

#### 51 **5. What is expected from you**

52 In order to ensure that the study runs smoothly it is important that you adhere to the following  
53 agreements. These agreements are that you:  
54

- 55 ● contact the researcher in case of problems (the contact details are listed at the end of the  
56 information letter);
- 57 ● keep all appointments with your therapist;
- 58 ● fill in the questionnaires before and after the treatment.  
59  
60

Besides, it is important that you contact the researcher if:

- your contact information changes
- you no longer wish to take part in the study

#### **6. Possible negative effects**

During the treatment you will actively engage with your thoughts and feelings about the loss. It is possible that feelings such as grief or loss or fatigue may temporarily increase in intensity. Filling in the questionnaire can also evoke emotional responses. When your problems increase to a great extent, you can contact the researcher via the contact details listed at the end of this letter.

#### **7. Possible advantages and disadvantages**

It is important that you carefully weigh the possible advantages and disadvantages before you decide to take part. The treatment may reduce your emotional problems, but this is not certain. Your participation will contribute to more knowledge about the treatment of emotional problems after the death of a loved one due to a traffic accident.

Disadvantages of taking part in the study may be:

- possible worsening of problems due to taking part in the treatment;
- possible worsening of problems due to filling in the questionnaire.

Participation in the study also means that:

- the study will cost you time;
- you will have to adhere to certain agreements.

These issues have all been described in section 4, 5 and 6 above.

#### **8. If you do not wish to participate or if you wish to stop participating in the study**

You decide whether or not to take part in the study. Participation is voluntary. If you do take part, you can always change your mind and stop participating after all, during the study as well. You do not have to give a reason for stopping. You do have to report this to the researcher immediately. The data collected up to that point will be used for the study.

If there is new information about the study that is important to you, the researcher will let you know this. We will then ask you if you continue to participate.

#### **9. End of the study**

Your participation in the study will end when: you will have filled in the questionnaire 8 weeks after the end of the treatment; you make the choice to stop participating; the researcher considers it better for you to stop participating; the government or the reviewing medical-ethical committee decide to end the study. The entire study will end when all participants are done. After processing all the data, the researcher will inform you of the most important outcomes of the study by means of a newsletter. You can indicate whether you wish to receive this newsletter at the end of the questionnaire.

## 10. Use and storage of your data

For this study your personal data will be collected, used and stored. This concerns data such as your name, address, date of birth and data related to your health. The collection, use and storage of your data is necessary to be able to answer the questions asked in this study and to publish the results. We ask your permission for the use of your data.

### Confidentiality of your data

In order to protect your privacy, your data will get a code. Your name and other data which can identify you directly will be left out from this. Data can only be traced to you with the key to the code. The key to the code will remain safely stored at the local research institution. The data sent to eventual other parties involved only contain the code, but not your name or other data with which you can be identified. In reports and publications on the study the data cannot be traced to you either.

### Access to your data for checks

Some people may get access to all your data at the research location, including the data without code. This is necessary to be able to check whether the study has been done properly and reliably. People who will gain access to your data for checking purposes will be the researchers Lonneke Lenferink, a research assistant and Jos de Keijser, the committee monitoring the safety of the study and international supervising authorities. They will keep your data secret. We ask you to give your permission for this access.

### Data retention period

Your data must be retained at the research location for 15 years. They are stored in order to be able to make new provisions related to this study in the course of this study.

### Withdrawal of permission

You can always withdraw your permission for the use of your personal data again. The research data collected up to the moment you withdraw permission will still be used in the study.

### Further information about your rights regarding data processing

For general information about your rights you can contact the person responsible for processing your personal data. For this study this is Lonneke Lenferink (University of Groningen). In case of questions or complaints regarding the processing of your personal data we recommend that you contact her.

## 11. Insurance for test subjects

An insurance has been taken out for everyone taking part in the study. The insurance covers damage from the study. You can report damage to the researchers.

## 12. Informing family doctor/GP

We do not share information about your participation in the study with your family doctor/GP.

## 13. Compensation for participation

1  
2  
3  
4 Participation in the online treatment is free of charge.  
5  
6

#### 7 **14. Do you have any questions?**

8  
9 In case of general questions regarding the study you can contact the researcher assistant. If you have  
10 complaints about the study, you can discuss this with the researchers or with your treating therapist. If  
11 you prefer not to do this, you can contact the University of Groningen.  
12  
13

#### 14 **15. Signing the consent form**

15  
16 Below you find a 'Declaration of consent for participation in research into the treatment of grief after a  
17 traffic accident', on which you can indicate whether you wish to take part in the study. With your  
18 permission you indicate that you have understood the information and that you agree to participate in  
19 the study.  
20  
21

22  
23 After you have filled in this declaration, you can start filling in the questionnaire. Approximately within  
24 four weeks after filling in the questionnaire we will let you know by email or by phone whether you  
25 qualify for the treatment. When you qualify for treatment, you will receive the outcome of the draw  
26 which indicates whether you have been assigned to a group that can start with the online treatment as  
27 soon as possible, or whether you have been assigned to the group that needs to wait for 20 weeks before  
28 the start of the online treatment.  
29

30  
31 If you have any further questions, you can contact us via the details below.  
32

33 Kind regards,  
34

35  
36 [name research assistant]  
37

38 Research assistant University of Groningen  
39

40  
41 Lonneke Lenferink  
42

43  
44 Post-doctoral researcher University of Groningen and Utrecht University  
45  
46  
47

#### 48 **Contact Details**

49  
50 General questions about the study: [name research assistant], [info@rouwnaverkeersongeval.nl](mailto:info@rouwnaverkeersongeval.nl)  
51

52  
53 Questions regarding the protection of your data, your rights or complaints: please contact Lonneke  
54 Lenferink, [i.m.lenferink@rug.nl](mailto:i.m.lenferink@rug.nl).  
55  
56  
57  
58  
59  
60

1  
2  
3  
4  
5  
6  
7  
8  
9  
10  
11  
12  
13  
14  
15  
16  
17  
18  
19  
20  
21  
22  
23  
24  
25  
26  
27  
28  
29  
30  
31  
32  
33  
34  
35  
36  
37  
38  
39  
40  
41  
42  
43  
44  
45  
46  
47  
48  
49  
50  
51  
52  
53  
54  
55  
56  
57  
58  
59  
60

**Consent Form**  
**for participation in research on treatment of grief after a traffic accident**

- I have read the information letter. I also had the opportunity to ask questions. My questions have been answered adequately. I had enough time to decide whether to participate or not.
- I know that participation is voluntary. I also know that I can decide at any moment not to participate after all or to stop participating in the study. I do not have to give a reason for this.
- I give permission for collecting and using my data to answer the research question of this study.
- I know that some people may gain access to all of my data for the purpose of checks of this study. Those people are listed in this information letter. I give permission for this access by these people.
- I wish to participate in this study.

Name of participant:

Email address:

Phone number:

Signature of participant:

Date: \_\_ / \_\_ / \_\_

---

The researcher, Lonneke Lenferink, hereby declares that the test subject has been fully informed about the aforementioned study.

If information becomes known during the study which might influence the consent of the participant, the participant will be timely informed about this.

# Reporting checklist for protocol of a clinical trial.

Based on the SPIRIT guidelines.

## Instructions to authors

Complete this checklist by entering the page numbers from your manuscript where readers will find each of the items listed below.

Your article may not currently address all the items on the checklist. Please modify your text to include the missing information. If you are certain that an item does not apply, please write "n/a" and provide a short explanation.

Upload your completed checklist as an extra file when you submit to a journal.

In your methods section, say that you used the SPIRIT reporting guidelines, and cite them as:

Chan A-W, Tetzlaff JM, Altman DG, Laupacis A, Gøtzsche PC, Krleža-Jerić K, Hróbjartsson A, Mann H, Dickersin K, Berlin J, Doré C, Parulekar W, Summerskill W, Groves T, Schulz K, Sox H, Rockhold FW, Rennie D, Moher D. SPIRIT 2013 Statement: Defining standard protocol items for clinical trials. *Ann Intern Med.* 2013;158(3):200-207

|                                   |                                                                                                                                 |  | Page   |
|-----------------------------------|---------------------------------------------------------------------------------------------------------------------------------|--|--------|
|                                   | Reporting Item                                                                                                                  |  | Number |
| <b>Administrative information</b> |                                                                                                                                 |  |        |
| Title                             | <a href="#">#1</a> Descriptive title identifying the study design, population, interventions, and, if applicable, trial acronym |  | 1      |

|    |                     |                     |                                                            |     |
|----|---------------------|---------------------|------------------------------------------------------------|-----|
| 1  | Trial registration  | <a href="#">#2a</a> | Trial identifier and registry name. If not yet registered, | 3   |
| 2  |                     |                     | name of intended registry                                  |     |
| 3  |                     |                     |                                                            |     |
| 4  |                     |                     |                                                            |     |
| 5  |                     |                     |                                                            |     |
| 6  | Trial registration: | <a href="#">#2b</a> | All items from the World Health Organization Trial         | n/a |
| 7  | data set            |                     | Registration Data Set                                      |     |
| 8  |                     |                     |                                                            |     |
| 9  |                     |                     |                                                            |     |
| 10 |                     |                     |                                                            |     |
| 11 |                     |                     |                                                            |     |
| 12 | Protocol version    | <a href="#">#3</a>  | Date and version identifier                                | n/a |
| 13 |                     |                     |                                                            |     |
| 14 |                     |                     |                                                            |     |
| 15 | Funding             | <a href="#">#4</a>  | Sources and types of financial, material, and other        | 32  |
| 16 |                     |                     | support                                                    |     |
| 17 |                     |                     |                                                            |     |
| 18 |                     |                     |                                                            |     |
| 19 |                     |                     |                                                            |     |
| 20 | Roles and           | <a href="#">#5a</a> | Names, affiliations, and roles of protocol contributors    | 32  |
| 21 | responsibilities:   |                     |                                                            |     |
| 22 |                     |                     |                                                            |     |
| 23 | contributorship     |                     |                                                            |     |
| 24 |                     |                     |                                                            |     |
| 25 |                     |                     |                                                            |     |
| 26 |                     |                     |                                                            |     |
| 27 |                     |                     |                                                            |     |
| 28 | Roles and           | <a href="#">#5b</a> | Name and contact information for the trial sponsor         | n/a |
| 29 | responsibilities:   |                     |                                                            |     |
| 30 |                     |                     |                                                            |     |
| 31 | sponsor contact     |                     |                                                            |     |
| 32 |                     |                     |                                                            |     |
| 33 | information         |                     |                                                            |     |
| 34 |                     |                     |                                                            |     |
| 35 |                     |                     |                                                            |     |
| 36 |                     |                     |                                                            |     |
| 37 |                     |                     |                                                            |     |
| 38 | Roles and           | <a href="#">#5c</a> | Role of study sponsor and funders, if any, in study        | 32  |
| 39 | responsibilities:   |                     | design; collection, management, analysis, and              |     |
| 40 |                     |                     | interpretation of data; writing of the report; and the     |     |
| 41 | sponsor and funder  |                     | decision to submit the report for publication, including   |     |
| 42 |                     |                     | whether they will have ultimate authority over any of      |     |
| 43 |                     |                     | these activities                                           |     |
| 44 |                     |                     |                                                            |     |
| 45 |                     |                     |                                                            |     |
| 46 |                     |                     |                                                            |     |
| 47 |                     |                     |                                                            |     |
| 48 |                     |                     |                                                            |     |
| 49 |                     |                     |                                                            |     |
| 50 |                     |                     |                                                            |     |
| 51 |                     |                     |                                                            |     |
| 52 | Roles and           | <a href="#">#5d</a> | Composition, roles, and responsibilities of the            | n/a |
| 53 | responsibilities:   |                     | coordinating centre, steering committee, endpoint          |     |
| 54 |                     |                     | adjudication committee, data management team, and          |     |
| 55 | committees          |                     |                                                            |     |
| 56 |                     |                     |                                                            |     |
| 57 |                     |                     |                                                            |     |
| 58 |                     |                     |                                                            |     |
| 59 |                     |                     |                                                            |     |
| 60 |                     |                     |                                                            |     |

other individuals or groups overseeing the trial, if applicable (see Item 21a for data monitoring committee)

## Introduction

|                                                 |                     |                                                                                                                                                                                                            |     |
|-------------------------------------------------|---------------------|------------------------------------------------------------------------------------------------------------------------------------------------------------------------------------------------------------|-----|
| Background and rationale                        | <a href="#">#6a</a> | Description of research question and justification for undertaking the trial, including summary of relevant studies (published and unpublished) examining benefits and harms for each intervention         | 4-7 |
| Background and rationale: choice of comparators | <a href="#">#6b</a> | Explanation for choice of comparators                                                                                                                                                                      | 4-7 |
| Objectives                                      | <a href="#">#7</a>  | Specific objectives or hypotheses                                                                                                                                                                          | 8   |
| Trial design                                    | <a href="#">#8</a>  | Description of trial design including type of trial (eg, parallel group, crossover, factorial, single group), allocation ratio, and framework (eg, superiority, equivalence, non-inferiority, exploratory) | 8-9 |
| <b>Methods:</b>                                 |                     |                                                                                                                                                                                                            |     |
| Participants, interventions, and outcomes       |                     |                                                                                                                                                                                                            |     |
| Study setting                                   | <a href="#">#9</a>  | Description of study settings (eg, community clinic, academic hospital) and list of countries where data will be collected. Reference to where list of study sites can be obtained                         | 10  |



|    |                      |                      |                                                              |       |
|----|----------------------|----------------------|--------------------------------------------------------------|-------|
| 1  | Eligibility criteria | <a href="#">#10</a>  | Inclusion and exclusion criteria for participants. If        | 11    |
| 2  |                      |                      | applicable, eligibility criteria for study centres and       |       |
| 3  |                      |                      | individuals who will perform the interventions (eg,          |       |
| 4  |                      |                      | surgeons, psychotherapists)                                  |       |
| 5  |                      |                      |                                                              |       |
| 6  |                      |                      |                                                              |       |
| 7  |                      |                      |                                                              |       |
| 8  |                      |                      |                                                              |       |
| 9  |                      |                      |                                                              |       |
| 10 |                      |                      |                                                              |       |
| 11 | Interventions:       | <a href="#">#11a</a> | Interventions for each group with sufficient detail to allow | 12-13 |
| 12 |                      |                      | replication, including how and when they will be             |       |
| 13 | description          |                      | administered                                                 |       |
| 14 |                      |                      |                                                              |       |
| 15 |                      |                      |                                                              |       |
| 16 |                      |                      |                                                              |       |
| 17 |                      |                      |                                                              |       |
| 18 |                      |                      |                                                              |       |
| 19 | Interventions:       | <a href="#">#11b</a> | Criteria for discontinuing or modifying allocated            | 19    |
| 20 |                      |                      | interventions for a given trial participant (eg, drug dose   |       |
| 21 | modifications        |                      | change in response to harms, participant request, or         |       |
| 22 |                      |                      | improving / worsening disease)                               |       |
| 23 |                      |                      |                                                              |       |
| 24 |                      |                      |                                                              |       |
| 25 |                      |                      |                                                              |       |
| 26 |                      |                      |                                                              |       |
| 27 |                      |                      |                                                              |       |
| 28 |                      |                      |                                                              |       |
| 29 | Interventions:       | <a href="#">#11c</a> | Strategies to improve adherence to intervention protocols,   | 10    |
| 30 |                      |                      | and any procedures for monitoring adherence (eg, drug        |       |
| 31 | adherence            |                      | tablet return; laboratory tests)                             |       |
| 32 |                      |                      |                                                              |       |
| 33 |                      |                      |                                                              |       |
| 34 |                      |                      |                                                              |       |
| 35 |                      |                      |                                                              |       |
| 36 | Interventions:       | <a href="#">#11d</a> | Relevant concomitant care and interventions that are         | 16-17 |
| 37 |                      |                      | permitted or prohibited during the trial                     |       |
| 38 | concomitant care     |                      |                                                              |       |
| 39 |                      |                      |                                                              |       |
| 40 |                      |                      |                                                              |       |
| 41 |                      |                      |                                                              |       |
| 42 | Outcomes             | <a href="#">#12</a>  | Primary, secondary, and other outcomes, including the        | 14-17 |
| 43 |                      |                      | specific measurement variable (eg, systolic blood            |       |
| 44 |                      |                      | pressure), analysis metric (eg, change from baseline, final  |       |
| 45 |                      |                      | value, time to event), method of aggregation (eg, median,    |       |
| 46 |                      |                      | proportion), and time point for each outcome. Explanation    |       |
| 47 |                      |                      | of the clinical relevance of chosen efficacy and harm        |       |
| 48 |                      |                      | outcomes is strongly recommended                             |       |
| 49 |                      |                      |                                                              |       |
| 50 |                      |                      |                                                              |       |
| 51 |                      |                      |                                                              |       |
| 52 |                      |                      |                                                              |       |
| 53 |                      |                      |                                                              |       |
| 54 |                      |                      |                                                              |       |
| 55 |                      |                      |                                                              |       |
| 56 |                      |                      |                                                              |       |
| 57 |                      |                      |                                                              |       |
| 58 |                      |                      |                                                              |       |
| 59 |                      |                      |                                                              |       |
| 60 |                      |                      |                                                              |       |

|    |                           |                      |                                                            |     |
|----|---------------------------|----------------------|------------------------------------------------------------|-----|
| 1  | Participant timeline      | <a href="#">#13</a>  | Time schedule of enrolment, interventions (including any   | 10  |
| 2  |                           |                      | run-ins and washouts), assessments, and visits for         |     |
| 3  |                           |                      | participants. A schematic diagram is highly recommended    |     |
| 4  |                           |                      | (see Figure)                                               |     |
| 5  |                           |                      |                                                            |     |
| 6  |                           |                      |                                                            |     |
| 7  |                           |                      |                                                            |     |
| 8  |                           |                      |                                                            |     |
| 9  |                           |                      |                                                            |     |
| 10 |                           |                      |                                                            |     |
| 11 | Sample size               | <a href="#">#14</a>  | Estimated number of participants needed to achieve         | 11  |
| 12 |                           |                      | study objectives and how it was determined, including      |     |
| 13 |                           |                      | clinical and statistical assumptions supporting any sample |     |
| 14 |                           |                      | size calculations                                          |     |
| 15 |                           |                      |                                                            |     |
| 16 |                           |                      |                                                            |     |
| 17 |                           |                      |                                                            |     |
| 18 |                           |                      |                                                            |     |
| 19 |                           |                      |                                                            |     |
| 20 |                           |                      |                                                            |     |
| 21 | Recruitment               | <a href="#">#15</a>  | Strategies for achieving adequate participant enrolment to | 10  |
| 22 |                           |                      | reach target sample size                                   |     |
| 23 |                           |                      |                                                            |     |
| 24 |                           |                      |                                                            |     |
| 25 |                           |                      |                                                            |     |
| 26 | <b>Methods:</b>           |                      |                                                            |     |
| 27 |                           |                      |                                                            |     |
| 28 | <b>Assignment of</b>      |                      |                                                            |     |
| 29 | <b>interventions (for</b> |                      |                                                            |     |
| 30 | <b>controlled trials)</b> |                      |                                                            |     |
| 31 |                           |                      |                                                            |     |
| 32 |                           |                      |                                                            |     |
| 33 |                           |                      |                                                            |     |
| 34 |                           |                      |                                                            |     |
| 35 |                           |                      |                                                            |     |
| 36 | Allocation: sequence      | <a href="#">#16a</a> | Method of generating the allocation sequence (eg,          | 8-9 |
| 37 | generation                |                      | computer-generated random numbers), and list of any        |     |
| 38 |                           |                      | factors for stratification. To reduce predictability of a  |     |
| 39 |                           |                      | random sequence, details of any planned restriction (eg,   |     |
| 40 |                           |                      | blocking) should be provided in a separate document that   |     |
| 41 |                           |                      | is unavailable to those who enrol participants or assign   |     |
| 42 |                           |                      | interventions                                              |     |
| 43 |                           |                      |                                                            |     |
| 44 |                           |                      |                                                            |     |
| 45 |                           |                      |                                                            |     |
| 46 |                           |                      |                                                            |     |
| 47 |                           |                      |                                                            |     |
| 48 |                           |                      |                                                            |     |
| 49 |                           |                      |                                                            |     |
| 50 |                           |                      |                                                            |     |
| 51 |                           |                      |                                                            |     |
| 52 |                           |                      |                                                            |     |
| 53 | Allocation                | <a href="#">#16b</a> | Mechanism of implementing the allocation sequence (eg,     | 8-9 |
| 54 | concealment               |                      | central telephone; sequentially numbered, opaque,          |     |
| 55 |                           |                      |                                                            |     |
| 56 |                           |                      |                                                            |     |
| 57 |                           |                      |                                                            |     |
| 58 | mechanism                 |                      |                                                            |     |
| 59 |                           |                      |                                                            |     |
| 60 |                           |                      |                                                            |     |

sealed envelopes), describing any steps to conceal the sequence until interventions are assigned

|                                                |                      |                                                                                                                                                      |     |
|------------------------------------------------|----------------------|------------------------------------------------------------------------------------------------------------------------------------------------------|-----|
| Allocation:                                    | <a href="#">#16c</a> | Who will generate the allocation sequence, who will enrol participants, and who will assign participants to interventions                            | 9   |
| Blinding (masking)                             | <a href="#">#17a</a> | Who will be blinded after assignment to interventions (eg, trial participants, care providers, outcome assessors, data analysts), and how            | 9   |
| Blinding (masking):<br>emergency<br>unblinding | <a href="#">#17b</a> | If blinded, circumstances under which unblinding is permissible, and procedure for revealing a participant's allocated intervention during the trial | n/a |

**Methods: Data  
collection,  
management, and  
analysis**

|                      |                      |                                                                                                                                                                                                                                                                                                                                                                                                              |       |
|----------------------|----------------------|--------------------------------------------------------------------------------------------------------------------------------------------------------------------------------------------------------------------------------------------------------------------------------------------------------------------------------------------------------------------------------------------------------------|-------|
| Data collection plan | <a href="#">#18a</a> | Plans for assessment and collection of outcome, baseline, and other trial data, including any related processes to promote data quality (eg, duplicate measurements, training of assessors) and a description of study instruments (eg, questionnaires, laboratory tests) along with their reliability and validity, if known. Reference to where data collection forms can be found, if not in the protocol | 14-17 |
|----------------------|----------------------|--------------------------------------------------------------------------------------------------------------------------------------------------------------------------------------------------------------------------------------------------------------------------------------------------------------------------------------------------------------------------------------------------------------|-------|

|    |                            |                      |                                                                |       |
|----|----------------------------|----------------------|----------------------------------------------------------------|-------|
| 1  | Data collection plan:      | <a href="#">#18b</a> | Plans to promote participant retention and complete            | n/a   |
| 2  |                            |                      |                                                                |       |
| 3  | retention                  |                      | follow-up, including list of any outcome data to be            |       |
| 4  |                            |                      | collected for participants who discontinue or deviate from     |       |
| 5  |                            |                      | intervention protocols                                         |       |
| 6  |                            |                      |                                                                |       |
| 7  |                            |                      |                                                                |       |
| 8  |                            |                      |                                                                |       |
| 9  |                            |                      |                                                                |       |
| 10 |                            |                      |                                                                |       |
| 11 | Data management            | <a href="#">#19</a>  | Plans for data entry, coding, security, and storage,           | 19    |
| 12 |                            |                      | including any related processes to promote data quality        |       |
| 13 |                            |                      | (eg, double data entry; range checks for data values).         |       |
| 14 |                            |                      | Reference to where details of data management                  |       |
| 15 |                            |                      | procedures can be found, if not in the protocol                |       |
| 16 |                            |                      |                                                                |       |
| 17 |                            |                      |                                                                |       |
| 18 |                            |                      |                                                                |       |
| 19 |                            |                      |                                                                |       |
| 20 |                            |                      |                                                                |       |
| 21 |                            |                      |                                                                |       |
| 22 |                            |                      |                                                                |       |
| 23 | Statistics: outcomes       | <a href="#">#20a</a> | Statistical methods for analysing primary and secondary        | 17-20 |
| 24 |                            |                      | outcomes. Reference to where other details of the              |       |
| 25 |                            |                      | statistical analysis plan can be found, if not in the protocol |       |
| 26 |                            |                      |                                                                |       |
| 27 |                            |                      |                                                                |       |
| 28 |                            |                      |                                                                |       |
| 29 |                            |                      |                                                                |       |
| 30 |                            |                      |                                                                |       |
| 31 | Statistics: additional     | <a href="#">#20b</a> | Methods for any additional analyses (eg, subgroup and          | 17-20 |
| 32 | analyses                   |                      | adjusted analyses)                                             |       |
| 33 |                            |                      |                                                                |       |
| 34 |                            |                      |                                                                |       |
| 35 |                            |                      |                                                                |       |
| 36 | Statistics: analysis       | <a href="#">#20c</a> | Definition of analysis population relating to protocol non-    | 17-20 |
| 37 | population and             |                      | adherence (eg, as randomised analysis), and any                |       |
| 38 | missing data               |                      | statistical methods to handle missing data (eg, multiple       |       |
| 39 |                            |                      | imputation)                                                    |       |
| 40 |                            |                      |                                                                |       |
| 41 |                            |                      |                                                                |       |
| 42 |                            |                      |                                                                |       |
| 43 |                            |                      |                                                                |       |
| 44 |                            |                      |                                                                |       |
| 45 |                            |                      |                                                                |       |
| 46 | <b>Methods: Monitoring</b> |                      |                                                                |       |
| 47 |                            |                      |                                                                |       |
| 48 |                            |                      |                                                                |       |
| 49 | Data monitoring:           | <a href="#">#21a</a> | Composition of data monitoring committee (DMC);                | 19    |
| 50 | formal committee           |                      | summary of its role and reporting structure; statement of      |       |
| 51 |                            |                      | whether it is independent from the sponsor and                 |       |
| 52 |                            |                      | competing interests; and reference to where further            |       |
| 53 |                            |                      |                                                                |       |
| 54 |                            |                      |                                                                |       |
| 55 |                            |                      |                                                                |       |
| 56 |                            |                      |                                                                |       |
| 57 |                            |                      |                                                                |       |
| 58 |                            |                      |                                                                |       |
| 59 |                            |                      |                                                                |       |
| 60 |                            |                      |                                                                |       |

1 details about its charter can be found, if not in the  
 2  
 3 protocol. Alternatively, an explanation of why a DMC is  
 4  
 5 not needed  
 6  
 7

|    |                      |                      |                                                              |    |
|----|----------------------|----------------------|--------------------------------------------------------------|----|
| 8  | Data monitoring:     | <a href="#">#21b</a> | Description of any interim analyses and stopping             | 19 |
| 9  |                      |                      |                                                              |    |
| 10 | interim analysis     |                      | guidelines, including who will have access to these          |    |
| 11 |                      |                      |                                                              |    |
| 12 |                      |                      | interim results and make the final decision to terminate     |    |
| 13 |                      |                      |                                                              |    |
| 14 |                      |                      | the trial                                                    |    |
| 15 |                      |                      |                                                              |    |
| 16 |                      |                      |                                                              |    |
| 17 |                      |                      |                                                              |    |
| 18 | Harms                | <a href="#">#22</a>  | Plans for collecting, assessing, reporting, and managing     | 19 |
| 19 |                      |                      |                                                              |    |
| 20 |                      |                      | solicited and spontaneously reported adverse events and      |    |
| 21 |                      |                      |                                                              |    |
| 22 |                      |                      | other unintended effects of trial interventions or trial     |    |
| 23 |                      |                      |                                                              |    |
| 24 |                      |                      | conduct                                                      |    |
| 25 |                      |                      |                                                              |    |
| 26 |                      |                      |                                                              |    |
| 27 |                      |                      |                                                              |    |
| 28 | Auditing             | <a href="#">#23</a>  | Frequency and procedures for auditing trial conduct, if      | 19 |
| 29 |                      |                      |                                                              |    |
| 30 |                      |                      | any, and whether the process will be independent from        |    |
| 31 |                      |                      |                                                              |    |
| 32 |                      |                      | investigators and the sponsor                                |    |
| 33 |                      |                      |                                                              |    |
| 34 |                      |                      |                                                              |    |
| 35 | <b>Ethics and</b>    |                      |                                                              |    |
| 36 |                      |                      |                                                              |    |
| 37 | <b>dissemination</b> |                      |                                                              |    |
| 38 |                      |                      |                                                              |    |
| 39 |                      |                      |                                                              |    |
| 40 |                      |                      |                                                              |    |
| 41 | Research ethics      | <a href="#">#24</a>  | Plans for seeking research ethics committee / institutional  | 19 |
| 42 |                      |                      |                                                              |    |
| 43 | approval             |                      | review board (REC / IRB) approval                            |    |
| 44 |                      |                      |                                                              |    |
| 45 |                      |                      |                                                              |    |
| 46 | Protocol             | <a href="#">#25</a>  | Plans for communicating important protocol modifications     | 19 |
| 47 |                      |                      |                                                              |    |
| 48 | amendments           |                      | (eg, changes to eligibility criteria, outcomes, analyses) to |    |
| 49 |                      |                      |                                                              |    |
| 50 |                      |                      | relevant parties (eg, investigators, REC / IRBs, trial       |    |
| 51 |                      |                      |                                                              |    |
| 52 |                      |                      | participants, trial registries, journals, regulators)        |    |
| 53 |                      |                      |                                                              |    |
| 54 |                      |                      |                                                              |    |
| 55 |                      |                      |                                                              |    |
| 56 |                      |                      |                                                              |    |
| 57 |                      |                      |                                                              |    |
| 58 |                      |                      |                                                              |    |
| 59 |                      |                      |                                                              |    |
| 60 |                      |                      |                                                              |    |

|    |                       |                      |                                                                |       |
|----|-----------------------|----------------------|----------------------------------------------------------------|-------|
| 1  | Consent or assent     | <a href="#">#26a</a> | Who will obtain informed consent or assent from potential      | 19    |
| 2  |                       |                      | trial participants or authorised surrogates, and how (see      |       |
| 3  |                       |                      | Item 32)                                                       |       |
| 4  |                       |                      |                                                                |       |
| 5  |                       |                      |                                                                |       |
| 6  |                       |                      |                                                                |       |
| 7  |                       |                      |                                                                |       |
| 8  |                       |                      |                                                                |       |
| 9  | Consent or assent:    | <a href="#">#26b</a> | Additional consent provisions for collection and use of        | n/a   |
| 10 |                       |                      | participant data and biological specimens in ancillary         |       |
| 11 | ancillary studies     |                      | studies, if applicable                                         |       |
| 12 |                       |                      |                                                                |       |
| 13 |                       |                      |                                                                |       |
| 14 |                       |                      |                                                                |       |
| 15 |                       |                      |                                                                |       |
| 16 | Confidentiality       | <a href="#">#27</a>  | How personal information about potential and enrolled          | 19    |
| 17 |                       |                      | participants will be collected, shared, and maintained in      |       |
| 18 |                       |                      | order to protect confidentiality before, during, and after     |       |
| 19 |                       |                      | the trial                                                      |       |
| 20 |                       |                      |                                                                |       |
| 21 |                       |                      |                                                                |       |
| 22 |                       |                      |                                                                |       |
| 23 |                       |                      |                                                                |       |
| 24 |                       |                      |                                                                |       |
| 25 |                       |                      |                                                                |       |
| 26 | Declaration of        | <a href="#">#28</a>  | Financial and other competing interests for principal          | 32    |
| 27 |                       |                      | investigators for the overall trial and each study site        |       |
| 28 | interests             |                      |                                                                |       |
| 29 |                       |                      |                                                                |       |
| 30 |                       |                      |                                                                |       |
| 31 |                       |                      |                                                                |       |
| 32 | Data access           | <a href="#">#29</a>  | Statement of who will have access to the final trial           | 19    |
| 33 |                       |                      | dataset, and disclosure of contractual agreements that         |       |
| 34 |                       |                      | limit such access for investigators                            |       |
| 35 |                       |                      |                                                                |       |
| 36 |                       |                      |                                                                |       |
| 37 |                       |                      |                                                                |       |
| 38 |                       |                      |                                                                |       |
| 39 | Ancillary and post    | <a href="#">#30</a>  | Provisions, if any, for ancillary and post-trial care, and for | 19    |
| 40 |                       |                      | compensation to those who suffer harm from trial               |       |
| 41 | trial care            |                      | participation                                                  |       |
| 42 |                       |                      |                                                                |       |
| 43 |                       |                      |                                                                |       |
| 44 |                       |                      |                                                                |       |
| 45 |                       |                      |                                                                |       |
| 46 |                       |                      |                                                                |       |
| 47 | Dissemination policy: | <a href="#">#31a</a> | Plans for investigators and sponsor to communicate trial       | 19-20 |
| 48 |                       |                      | results to participants, healthcare professionals, the         |       |
| 49 | trial results         |                      | public, and other relevant groups (eg, via publication,        |       |
| 50 |                       |                      | reporting in results databases, or other data sharing          |       |
| 51 |                       |                      | arrangements), including any publication restrictions          |       |
| 52 |                       |                      |                                                                |       |
| 53 |                       |                      |                                                                |       |
| 54 |                       |                      |                                                                |       |
| 55 |                       |                      |                                                                |       |
| 56 |                       |                      |                                                                |       |
| 57 |                       |                      |                                                                |       |
| 58 |                       |                      |                                                                |       |
| 59 |                       |                      |                                                                |       |
| 60 |                       |                      |                                                                |       |

1 Dissemination policy: [#31b](#) Authorship eligibility guidelines and any intended use of n/a  
 2 authorship professional writers  
 3  
 4

5  
 6 Dissemination policy: [#31c](#) Plans, if any, for granting public access to the full n/a  
 7 reproducible protocol, participant-level dataset, and statistical code  
 8  
 9  
 10  
 11 research  
 12

## 13 Appendices

14  
 15  
 16  
 17 Informed consent [#32](#) Model consent form and other related documentation 10  
 18 materials given to participants and authorised surrogates  
 19  
 20

21  
 22  
 23 Biological specimens [#33](#) Plans for collection, laboratory evaluation, and storage of n/a  
 24 biological specimens for genetic or molecular analysis in  
 25 the current trial and for future use in ancillary studies, if  
 26  
 27  
 28  
 29 applicable  
 30  
 31

32  
 33 None The SPIRIT checklist is distributed under the terms of the Creative Commons Attribution  
 34 License CC-BY-ND 3.0. This checklist can be completed online using <https://www.goodreports.org/>, a  
 35 tool made by the [EQUATOR Network](#) in collaboration with [Penelope.ai](#)  
 36  
 37  
 38  
 39  
 40  
 41  
 42  
 43  
 44  
 45  
 46  
 47  
 48  
 49  
 50  
 51  
 52  
 53  
 54  
 55  
 56  
 57  
 58  
 59  
 60

# BMJ Open

## Online cognitive behavioral therapy for traumatically bereaved people: Study protocol for a randomized waitlist-controlled trial

|                                 |                                                                                                                                                                                                                                                                                                                                                                                                                                                   |
|---------------------------------|---------------------------------------------------------------------------------------------------------------------------------------------------------------------------------------------------------------------------------------------------------------------------------------------------------------------------------------------------------------------------------------------------------------------------------------------------|
| Journal:                        | <i>BMJ Open</i>                                                                                                                                                                                                                                                                                                                                                                                                                                   |
| Manuscript ID                   | bmjopen-2019-035050.R2                                                                                                                                                                                                                                                                                                                                                                                                                            |
| Article Type:                   | Protocol                                                                                                                                                                                                                                                                                                                                                                                                                                          |
| Date Submitted by the Author:   | 21-Jul-2020                                                                                                                                                                                                                                                                                                                                                                                                                                       |
| Complete List of Authors:       | Lenferink, Lonneke; Rijksuniversiteit Groningen, Clinical Psychology and Experimental Psychopathology; Utrecht University, Clinical Psychology de Keijser, Jos; Rijksuniversiteit Groningen, Clinical Psychology and Experimental Psychopathology<br>Eisma, Maarten; Clinical Psychology and Experimental Psychopathology<br>Smid, Geert; Foundation Centrum '45<br>Boelen, Paul; Utrecht University, Clinical Psychology; Foundation Centrum '45 |
| <b>Primary Subject Heading</b>: | Mental health                                                                                                                                                                                                                                                                                                                                                                                                                                     |
| Secondary Subject Heading:      | Mental health, Evidence based practice                                                                                                                                                                                                                                                                                                                                                                                                            |
| Keywords:                       | PSYCHIATRY, Adult psychiatry < PSYCHIATRY, PUBLIC HEALTH                                                                                                                                                                                                                                                                                                                                                                                          |
|                                 |                                                                                                                                                                                                                                                                                                                                                                                                                                                   |

SCHOLARONE™  
Manuscripts





I, the Submitting Author has the right to grant and does grant on behalf of all authors of the Work (as defined in the below author licence), an exclusive licence and/or a non-exclusive licence for contributions from authors who are: i) UK Crown employees; ii) where BMJ has agreed a CC-BY licence shall apply, and/or iii) in accordance with the terms applicable for US Federal Government officers or employees acting as part of their official duties; on a worldwide, perpetual, irrevocable, royalty-free basis to BMJ Publishing Group Ltd ("BMJ") its licensees and where the relevant Journal is co-owned by BMJ to the co-owners of the Journal, to publish the Work in this journal and any other BMJ products and to exploit all rights, as set out in our [licence](#).

The Submitting Author accepts and understands that any supply made under these terms is made by BMJ to the Submitting Author unless you are acting as an employee on behalf of your employer or a postgraduate student of an affiliated institution which is paying any applicable article publishing charge ("APC") for Open Access articles. Where the Submitting Author wishes to make the Work available on an Open Access basis (and intends to pay the relevant APC), the terms of reuse of such Open Access shall be governed by a Creative Commons licence – details of these licences and which [Creative Commons](#) licence will apply to this Work are set out in our licence referred to above.

Other than as permitted in any relevant BMJ Author's Self Archiving Policies, I confirm this Work has not been accepted for publication elsewhere, is not being considered for publication elsewhere and does not duplicate material already published. I confirm all authors consent to publication of this Work and authorise the granting of this licence.

1  
2  
3 **Online cognitive behavioral therapy for traumatically bereaved people: Study protocol for**  
4  
5 **a randomized waitlist-controlled trial**  
6  
7

8 Lenferink, L.I.M.\*<sup>1,2</sup>, de Keijser, J.<sup>1</sup>, Eisma, M.C.<sup>1</sup>, Smid, G.E.<sup>3,4,5</sup>, & Boelen, P.A.<sup>2,3,4</sup>  
9  
10

11  
12 <sup>1</sup> Department of Clinical Psychology and Experimental Psychopathology, Faculty of  
13 Behavioral and Social Sciences, University of Groningen, Grote Kruisstraat 2/1, 9712 TS  
14 Groningen, The Netherlands. E-mail L.I.M. Lenferink: l.i.m.lenferink@rug.nl.  
15  
16

17  
18  
19  
20 <sup>2</sup> Department of Clinical Psychology, Faculty of Social Sciences, Utrecht University, P.O. Box  
21 80140, 3508 TC, Utrecht, The Netherlands.  
22  
23

24  
25  
26 <sup>3</sup> ARQ Nationaal Psychotrauma Centre, Nienoord 5, 1112 XE, Diemen, The Netherlands  
27  
28

29  
30 <sup>4</sup> Foundation Centrum '45, Nienoord 5, 1112 XE Diemen, The Netherlands  
31  
32

33  
34 <sup>5</sup> University of Humanistic Studies, Utrecht, The Netherlands  
35

36 \*Corresponding author  
37  
38  
39  
40  
41  
42  
43  
44  
45  
46  
47  
48  
49  
50  
51  
52  
53  
54  
55  
56  
57  
58  
59  
60

## Abstract

### Introduction

The traumatic death of a loved one, such as death due to a traffic accident, can precipitate persistent complex bereavement disorder (PCBD) and comorbid posttraumatic stress disorder (PTSD) and depression. Waitlist-controlled trials have shown that grief-specific cognitive behavioral therapy (CBT) is an effective treatment for such mental health problems. This is the first study that will examine the effectiveness of online CBT (vs. waitlist controls) in a sample exclusively comprised of people bereaved by a traumatic death. Our primary hypothesis is that people allocated to the online CBT condition will show larger reductions in PCBD, PTSD, and depression symptom levels at post-treatment than people allocated to a waitlist. We further expect that reductions in symptom levels during treatment are associated with reductions of negative cognitions and avoidance behaviors and the experience of fewer accident-related stressors. Moreover, the effect of the quality of the therapeutic alliance on treatment effects and drop-out rates will be explored.

### Methods and analysis

A two-arm (online CBT vs. waiting list) open label parallel randomized controlled trial (RCT) will be conducted. Participants will complete questionnaires at pre-treatment and 12 and 20 weeks after study enrolment. Eligible for participation are Dutch adults who lost a loved one at least one year earlier due to a traffic accident and report clinically relevant levels of PCBD, PTSD, and/or depression. Multilevel modeling will be used.

### Ethics and dissemination

1  
2  
3 Ethics approval has been received by the Medical Ethics Review Board of the University  
4  
5 Medical Center Groningen (METc UMCG: M20.252121). This study will provide new insights  
6  
7 in the effectiveness of online CBT for traumatically bereaved people. If the treatment is  
8  
9 demonstrated to be effective, it will be made publicly accessible. Findings will be  
10  
11 disseminated among lay people (e.g., through newsletters and media performances), our  
12  
13 collaborators (e.g., through presentations at support organizations), and clinicians and  
14  
15 researchers (e.g., through presentations at support organizations), and clinicians and  
16  
17 researchers (e.g., through conference presentations and scientific journal articles).  
18  
19  
20

### 21 **Strengths and limitations of this study**

- 22
- 23
- 24 • This study is the first to examine the effectiveness of online CBT (vs. waitlist controls)  
25  
26 in reducing psychopathology after traumatic loss in an RCT.
- 27
- 28
- 29 • This study is one of the first to examine potential correlates of change in symptom  
30  
31 levels following online treatment after traumatic loss.
- 32
- 33
- 34 • We are not able to formally test mediators or moderators of treatment effects.
- 35
- 36 • We are not able to examine if online CBT has equal effects as face-to-face CBT.
- 37
- 38
- 39 • We are not able to establish formal diagnoses, as we use self-report questionnaires,  
40  
41 instead of diagnostic interviews, to assess symptom levels.  
42  
43  
44

45 **Trial registration number:** NL7497 (Dutch Trial Register)

46  
47 **Word Count:** 5,133 words including main text  
48  
49  
50  
51  
52  
53  
54  
55  
56  
57  
58  
59  
60

Worldwide, traffic accidents represent the leading cause of unnatural deaths(1). Ten to 20 percent of bereaved people who experience natural deaths (e.g., illness) develop severe and persistent grief-related distress, including persistent complex bereavement disorder (PCBD), posttraumatic stress disorder (PTSD), and depression(2,3). Notably, PCBD has been introduced as other specified trauma- and stressor-related disorder, in the latest version of the Diagnostic and Statistical manual of Mental Diseases (DSM-5)(4). PCBD can be diagnosed if, after the death of a significant other at least 12 months earlier, a person experiences persistent yearning for the deceased and symptoms of reactive distress (e.g., emotional numbness) and social/identity disruption (e.g., feeling alone) causing impairment in daily life. While some PCBD symptoms overlap with PTSD (e.g., anger) and depression symptoms (e.g., diminished interest in activities), several studies have shown that these three syndromes are distinct(5–7). Unexpected/violent losses of a significant other, also referred to as a traumatic losses, including deaths caused by traffic accidents, increase risks for the development of PCBD, PTSD, and depression(8,9).

#### *Heightened risk for developing psychopathology after deaths due to traffic accident*

Specific circumstances of losses caused by accidents may account for the elevated risk of grief-related distress. For instance, experiencing multiple losses simultaneously, being a witness to the accident, and juridical and financial consequences are proposed to exacerbate grief-related distress(10). Furthermore, negative cognitions and avoidance behaviors may mediate the influence of sudden/violent loss on grief, PTSD, and depression levels(11). According to a cognitive-behavioral model three interacting malleable processes underlie disturbed grief reactions: i) negative cognitions, ii) avoidance behavior, and iii) difficulties integrating the loss into the autobiographical knowledge base(12).

1  
2  
3           Experiencing a loss due to a traffic accident may violate basic assumptions about the  
4 world being a safe place(13). This may fuel negative cognitions (e.g., “I’m less worthy, since  
5 s/he died” and “The death of him/her has taught me that the world is unjust) that may  
6 exacerbate and maintain acute grief responses(14). Avoidance behaviors include depressive  
7 avoidance and anxious avoidance strategies. Depressive avoidance refers to withdrawal from  
8 social and occupational activities that were perceived as fulfilling before the death, out of  
9 the conviction that these activities are no longer meaningful. Anxious avoidance strategies  
10 serve to prevent confrontation with the reality of the death, out of fear that confrontation is  
11 too painful(12). One potential way to avoid confrontation with the reality of the loss, is to  
12 focus on angry thoughts and feelings (e.g., “I was angry at the police, courts, or  
13 administration, because they did not do their work well enough”)(15). This seems to be a  
14 frequently used avoidant coping strategy in bereaved people after traffic accidents and is  
15 strongly related to PTSD(16). Difficulty with integration of the loss into the autobiographical  
16 knowledge base refers to the difficulties connecting factual knowledge that the loss is  
17 irreversible with existing information about the self and the relationship with the lost  
18 person, stored in autobiographical memory. Memories related to the loss may lack context  
19 in terms of time and place, causing the loss to be experienced as unreal(17). It has been  
20 argued that this “sense of unrealness” may trigger intrusive memories and increase feelings  
21 of numbness or shock once the bereaved person is confronted with reminders of the  
22 loss(17,18). The extent to which a person believes that one is capable of managing stressor-  
23 related thoughts, emotions, and behaviors, also referred to as self-efficacy (e.g., “I can  
24 usually handle whatever comes my way”), has also been determined as an important factor  
25 facilitating coping with traumatic stressors(19). Decreased self-efficacy, negative cognitions  
26  
27  
28  
29  
30  
31  
32  
33  
34  
35  
36  
37  
38  
39  
40  
41  
42  
43  
44  
45  
46  
47  
48  
49  
50  
51  
52  
53  
54  
55  
56  
57  
58  
59  
60

1  
2  
3 and insufficient integration of the loss may contribute to increased sensitivity to loss  
4  
5 reminders or secondary stressors following traumatic loss(20).  
6  
7

### 8 9 *Cognitive-behavioral therapy for grief-related distress*

10  
11  
12 Grief-specific CBT has been demonstrated to be the most effective treatment for bereaved  
13  
14 people with elevated grief levels(21–24). CBT targets the abovementioned cognitive-  
15  
16 behavioral variables with cognitive restructuring, loss-related exposure, and behavioral  
17  
18 activation. Notably, research on putative mechanisms of change of grief-specific CBT is  
19  
20 sparse(23) (but see(25,26)). Examining the effectiveness of grief-specific CBT and its  
21  
22 potential mechanisms of change in traumatically bereaved people with traumatic grief is  
23  
24 clinically relevant because it would enable tailoring of interventions to the specific needs of  
25  
26 this group, which could improve treatment outcomes(27).  
27  
28  
29  
30  
31

32  
33 Whilst the majority of trials assess the efficacy of face-to-face CBT(24), so far, to the  
34  
35 best of our knowledge, three online CBT-based interventions have been developed for  
36  
37 distressed bereaved people(28–30). These prior studies provided preliminary data on the  
38  
39 potential effectiveness of online grief-specific CBT, but had some limitations. For instance,  
40  
41 treatment was solely provided to people who experienced perinatal loss (29) or included  
42  
43 relatively small samples (28). Comparability between these three studies is also limited,  
44  
45 because interventions differed in treatment content; different elements of CBT were  
46  
47 offered, for instance behavioral activation, exposure (28), or writing assignments (29,30).  
48  
49 Offering CBT via the internet has some potential advantages. It may lower the threshold for  
50  
51 seeking treatment, because it can be delivered independent of geographical location.  
52  
53 Furthermore, asynchronous communication may be used, allowing the client and therapist  
54  
55 can contact each other at any preferred time(31). This may counter barriers to mental health  
56  
57  
58  
59  
60

1  
2  
3 service use, such as difficulties with finding help, transportation concerns, or difficulties  
4  
5 scheduling treatment sessions(32). In addition, online CBT could reduce treatment costs,  
6  
7 improving accessibility and dissemination of care for people in need of support(33).  
8  
9  
10 Moreover, during times of a crisis, such as the COVID-19 pandemic, it seems more relevant  
11  
12 than ever to further examine the effectiveness of online CBT for distressed bereaved people,  
13  
14 as it will allow them to retain access to evidence-based care (34).  
15  
16

17  
18 A potential downside to online CBT is the high dropout rate found in earlier  
19  
20 studies(33,35). It has been argued that a strong therapeutic alliance might support  
21  
22 adherence to online treatment and mediates treatment effects (36). Therapeutic alliance is  
23  
24 defined as a positive emotional bond between client and therapist, whereby both parties  
25  
26 agree on the tasks and goals of the treatment(37). The client-therapist relationship might  
27  
28 also explain why online treatments are more effective with therapist guidance than without  
29  
30 (31). Concerns have been raised that developing a therapeutic relationship might be more  
31  
32 difficult when non-verbal communication is absent(38). However, studies in non-bereaved  
33  
34 samples indicate that developing a strong therapeutic alliance is possible during online  
35  
36 treatment(33) and that therapeutic alliance is often related to online treatment  
37  
38 outcomes(39), but not always (33). More research is needed to further examine the  
39  
40 interrelations of the quality of client-therapist relationship, drop-out, and treatment  
41  
42 outcomes in online CBT.  
43  
44  
45  
46  
47  
48  
49

### 50 51 *Study objectives*

52  
53  
54 Our first aim is to examine the effectiveness of online CBT (vs. a waiting list control  
55  
56 condition) in reducing symptom levels of PCBD, PTSD, and depression in people bereaved by  
57  
58 a traffic accident. We expect that participants assigned to the online CBT condition will show  
59  
60



1  
2  
3 larger reductions in symptom levels of PCBD, PTSD, and depression compared with waitlist  
4  
5 controls at post-treatment assessments (Hypothesis 1).  
6  
7

8  
9 Our second aim is to explore correlates of change. Based on prior research and  
10 theories(12,16,19), we expect that reductions in negative cognitions, avoidance behaviors,  
11 state anger, a sense of unrealness, and improvement in self-efficacy are related to  
12 reductions in PCBD, PTSD, and depression levels in online CBT (Hypothesis 2a). Additionally,  
13 we aim to explore whether background characteristics (i.e., gender, age, and educational  
14 level, kinship to the deceased, and time since loss) and accident-related stressors (i.e., single  
15 vs. multiple loss, witnessing the accident, and status of legal trial) are related to treatment  
16 effects (Hypothesis 2b). We have no specific expectations regarding these associations  
17 because prior treatment studies in bereaved people showed inconsistent results(24,25,40).  
18 However, based on clinical experience, we expect that accident-related stressors are  
19 associated with treatment effects, such that multiple loss, witnessing the accident, and on-  
20 going legal trial negatively impact treatment effects.  
21  
22  
23  
24  
25  
26  
27  
28  
29  
30  
31  
32  
33  
34  
35  
36  
37  
38

39 Our third aim is to explore the associations between quality of the therapeutic  
40 alliance and drop-out rates and treatment outcomes. We expect that a stronger therapeutic  
41 alliance is related to lower dropout rates and better treatment outcomes.  
42  
43  
44  
45  
46

## 47 **Methods and analysis**

### 48 **Design**

49  
50  
51 A two-arm (online CBT vs. waiting list) multi-centre open label parallel RCT will be  
52 conducted. Randomization will take place after the participant is screened for eligibility-  
53 based inclusion criteria (described below). A random number generator ([www.random.org](http://www.random.org))  
54  
55  
56  
57  
58  
59  
60

1  
2  
3 will be used by a blinded independent researcher, to perform the blocking randomization  
4  
5 procedure. An allocation ratio of 1:1 will be applied.  
6  
7

8  
9 Participants allocated to the online CBT condition receive treatment within one week  
10  
11 after allocation. All participants will be asked to fill in questionnaires (described below) at  
12  
13 baseline (T1), 12 weeks post-allocation (T2 for the intervention condition and T1a for waitlist  
14  
15 controls), and 20 weeks post-allocation (T3 for the intervention condition and T1b for  
16  
17 waitlist controls). For participants in the waiting list control group, at the end of the 20-week  
18  
19 waiting period after which they will receive online CBT, they will be asked to fill in T2 and T3  
20  
21 12 and 20 weeks after starting treatment, respectively (see Figure 1). A link to online  
22  
23 questionnaires will be sent to the participants by a non-blinded member of the research  
24  
25 team at each time-point. A waitlist control group (instead of a no treatment control group) is  
26  
27 chosen to increase the likelihood of continued study participation by guaranteeing that all  
28  
29 participants receive treatment. Furthermore, the inclusion of a waiting list control group  
30  
31 allows a treatment versus no treatment comparison, that will provide knowledge about the  
32  
33 effects of treatment relative to natural recovery from loss.  
34  
35  
36  
37  
38  
39  
40

41 In line with prior treatment studies from our research group(40,41), the online  
42  
43 treatment is guided by governmentally licensed psychologists, connected with a Dutch  
44  
45 informal “traumatic loss network” of therapists specialized in treating emotional distress  
46  
47 following traumatic loss. In total six therapists (including authors PB and JdK who are  
48  
49 registered clinical psychologists) will guide the participants online; participants will receive  
50  
51 feedback from the same therapist each time. The therapists will receive a training, provided  
52  
53 by LL, PB, and JdK, on the use of the treatment protocol of this intervention study. In  
54  
55 preparation for the training, therapists read all treatment materials and a selection of grief  
56  
57  
58  
59  
60

1  
2  
3 treatment literature. Instructions about the use of the online treatment interface will be  
4  
5 given by its developers. During a 5-hour face-to-face group meeting the rationale of the  
6  
7 online treatment will be explained and research procedures will be discussed. In a 2-hour  
8  
9 online video-meeting outstanding questions regarding the treatment and the research  
10  
11 project will be answered. Supervision (by telephone or mail) by PB and JdK is possible on  
12  
13 request, for instance when therapists encounter difficulties in treatment. Therapists will be  
14  
15 contacted by a member of the research team by phone or email biweekly to monitor  
16  
17 treatment progress and protocol adherence. Treatment costs will be reimbursed.  
18  
19  
20  
21  
22

23 ==Figure 1 about here==  
24  
25

## 26 **Participants**

27  
28  
29  
30 This RCT is part of a larger on-going research project (the "TrafVic-project") examining the  
31  
32 psychological impact of, and care after, the death of a loved one due to a traffic accident.  
33  
34 We expect to recruit the majority of the participants via a survey that started in December  
35  
36 2018 and included the following question: "In this study we would like to offer psychological  
37  
38 help to persons who experience emotional problems. May we approach you with more  
39  
40 information about this offer, if your answers to this questionnaire show that you experience  
41  
42 emotional problems?" Those who answered 'yes' will be sent a letter with information about  
43  
44 the intervention, the treatment study, and an informed consent form (see Supplementary  
45  
46 Materials). A Dutch website ([www.rounnaverkeersongeval.nl](http://www.rounnaverkeersongeval.nl)) has been developed so that  
47  
48 potential participants can read information about the research and treatment. People who  
49  
50 are interested can also sign up for the study via this website. Recruitment for this RCT had  
51  
52 not started at the time of submission of this manuscript.  
53  
54  
55  
56  
57  
58  
59  
60

1  
2  
3 To be eligible for study participation, the person must 1) be a family member,  
4 spouse, or friend of a person who died due to a traffic accident at least one year earlier, 2)  
5 be  $\geq 18$  years of age, and 3) meet DSM-5 criteria for PCBD and/or PTSD and/or experience  
6 clinically relevant depression, based on questionnaire scores (see below for more details).  
7  
8 People are excluded when they do not master the Dutch language or have no Internet  
9 access.  
10  
11  
12  
13  
14  
15  
16  
17

### 18 **Sample size**

19  
20  
21 To test our primary hypothesis (Hypothesis 1), a test for each outcome separately (PCBD,  
22 PTSD, and depression) will be conducted to assess the effects of online CBT vs. waitlist  
23 controls. To find a difference between two groups (online CBT vs. waitlist controls) of at least  
24 a medium effect size ( $f = 0.25$ ; based on prior research(22,28,40)) with a power of 80%, an  $\alpha$   
25 of 0.017 (corrected for multiple testing, i.e.,  $0.05/3$ , as there are three primary outcome  
26 measures (PCBD, PTSD, and depression)), and a strong association ( $r = .50$ ) between the pre-  
27 and post-assessment, a sample size of 23 per condition is sufficient. Taking into account an  
28 average dropout rate of 19% (22), a total sample size of 55 (46+9) is required to test  
29 Hypothesis 1.  
30  
31  
32  
33  
34  
35  
36  
37  
38  
39  
40  
41  
42  
43  
44

45 Because our data are nested (repeated measures) (level 1) within individuals (level  
46 2), and possibly within families sharing the same household (level 3), multi-level modeling  
47 will be performed to test hypothesis 1. Conducting a power analysis within a multi-level  
48 framework is not feasible for various reasons(42). Our power analysis is therefore based on a  
49 repeated measures ANOVA.  
50  
51  
52  
53  
54  
55  
56

### 57 **Intervention**

1  
2  
3 Online CBT will consist of eight one-on-one sessions, called lessons, offered within a  
4  
5 timeframe of 12 weeks. Eight sessions have shown to be sufficient to yield clinically relevant  
6  
7 effects in prior research(40). Following Dutch guidelines for grief-specific CBT(42), central  
8  
9 components of the treatment are exposure, cognitive restructuring, and behavioral  
10  
11 activation. In the first session, psychoeducation is offered, including information about  
12  
13 possible emotional reactions to the death of a loved one in a traffic accident and processes  
14  
15 that might foster or hamper recovery. A rationale for the CBT interventions is provided.  
16  
17  
18  
19  
20

21 Then, session 2, 3, and 4 are focused on exposure; the circumstances and story of the  
22  
23 loss are presented in detail, and the participant is encouraged to confront stimuli that s/he  
24  
25 tends to avoid. Exposure is conducted by imaginary exposure assignments and by writing  
26  
27 assignment that have proven to be effective in prior research(30). These writing assignments  
28  
29 are focused on writing a detailed narrative of the loss and its circumstances.  
30  
31  
32  
33

34 The next sessions (5 and 6) focus on identifying and changing negative cognitions  
35  
36 that hamper adjustment (i.e., cognitive restructuring); specific attention is paid to cognitions  
37  
38 connected with responsibility/guilt and anger that may be experienced following the  
39  
40 accidental death(10). Cognitive restructuring assignments are provided to gain an alternative  
41  
42 perspective on negative thoughts about the self, life, the future, through 1) psycho-  
43  
44 education about common unhelpful thoughts, 2) identifying one's own unhelpful thoughts,  
45  
46 and 3) challenging these thoughts. Participants are instructed to undertake these three steps  
47  
48 by providing a daily description of i) an emotional moment/event, ii) their thoughts during  
49  
50 this event, iii) their feelings (and intensity of these feelings on a scale of 1 through 10), iv)  
51  
52 their behavior, v) evaluation of their thoughts), and vi) alternative helpful thoughts.  
53  
54  
55  
56  
57  
58  
59  
60

1  
2  
3 In session 7 and 8, participants are encouraged to re-engage in previously valued  
4 social, recreational, and occupational activities in order to facilitate the process of  
5 adjustment. Behavioral activation assignments are focused on writing about valued activities  
6 and making plans to achieve valued goals. Session 8 is also focused on what the participant  
7 has learned and how to deal with difficulties in the future.  
8  
9  
10  
11  
12  
13  
14  
15

16 All information and assignments are presented in an online framework, offered via a  
17 secure website. Participants receive online written information that consists of  
18 psychoeducation, information about treatment content and structure, and homework  
19 assignments. As part of the online treatment, participants also listen to a video-therapist  
20 verbally sharing parts of information that are also presented in text. The video-therapists are  
21 two members from the traumatic loss network; one male and one female psychotherapist  
22 who are middle-aged and specialized in treating bereaved people. At the start of the  
23 treatment the video-therapists introduce themselves and the participant is asked to select  
24 one of the video-therapists. The information shared by these video-therapists are recorded  
25 in video-messages in which they read parts of the texts out loud. Each participant therefore  
26 receives the same information from a video-therapist. Direct contact with the video-  
27 therapist is not possible.  
28  
29  
30  
31  
32  
33  
34  
35  
36  
37  
38  
39  
40  
41  
42  
43  
44  
45

46 Participants receive weekly asynchronous written feedback from one online therapist  
47 on each assignment that they complete online. As mentioned earlier, six online therapists  
48 are trained to guide the participants. The online therapists are instructed to contact the  
49 participant twice a week; once to encourage participants to log in and complete assignments  
50 and once to provide feedback on assignments. In total, they spend 30 minutes per week on  
51 reading assignments and providing feedback. Moreover, participants are encouraged to ask  
52  
53  
54  
55  
56  
57  
58  
59  
60

1  
2  
3 a family member or friend to support them during treatment. This support figure is then  
4  
5 informed about the treatment through written information in an online framework.  
6  
7

## 8 9 **Measures**

### 10 11 *Primary outcome measures*

12  
13  
14  
15 PCBD will be assessed with the Traumatic Grief Inventory-Self Report (TGI-SR)(43). The TGI-  
16  
17 SR consists of 18 items on a 5-point Likert scale ranging from 1 = never through 5 = always.  
18  
19 Four items tapping disturbed grief criteria according to the 11th edition of the International  
20  
21 Classification of Diseases were added(44). An example of an item is: "I found it difficult to  
22  
23 trust others". The instruction of the original questionnaire was altered from referring to "the  
24  
25 death of your loved one" to "the death of your loved one(s) due to a traffic accident".  
26  
27  
28  
29 Psychometric properties of the TGI-SR are adequate(43,45). Participants are considered to  
30  
31 meet criteria for DSM-5 PCBD(4) when they score at least 3 ("Sometimes") on at least 1  
32  
33 criterion B symptom (Item 1, item 2, item 3, and item 14), at least 6 criterion C symptoms  
34  
35 (item 4 up to 11, and item 15 up to 18), and the criterion D symptom (item 13).  
36  
37  
38  
39

40  
41 PTSD will be assessed with the PTSD Checklist for DSM-5 (PCL-5)(46) (Dutch version:  
42  
43 (47)). Participants rate how often they were bothered by each symptom (e.g., "In the past  
44  
45 month, how much were you bothered by trouble remembering important parts of the  
46  
47 accident?") on 5-point Likert scales (0 = not at all and 4 = extremely). The instruction and the  
48  
49 items of the original questionnaire are altered from referring to the "stressful event" to the  
50  
51 "the death of your loved one(s) due to a traffic accident". The PCL-5 has shown to be reliable  
52  
53 and valid(46). Participants meet the criteria for DSM-5 PTSD(4) when they score at least 2  
54  
55 ("Moderately") on 1 criterion B item (items 1-5), 1 criterion C item (items 6-7), 2 criterion D  
56  
57 items (items 8-14), and 2 criterion E items (items 15-20).  
58  
59  
60

1  
2  
3 Depression symptom levels are assessed with the depression subscale of the HADS-  
4 D(48). The HADS-D consists of 7 items (e.g., “I still enjoy the thing I used to do”) rated on 4-  
5 point scores ranging from 0 (e.g., “Hardly at all”) through 3 (e.g., “Definitely as much”). The  
6 Dutch HADS-D is a reliable and valid screening tool for depression(49). A cut-off score of  $\geq 8$   
7 is used as indicator for clinically relevant depression(48).  
8  
9

### 16 *Secondary outcome measures*

17  
18  
19 Negative grief-related cognitions are assessed with 18 items from the Grief  
20 Cognitions Questionnaire (GCQ)(14). Participants are asked to rate their agreement with  
21 each item (e.g., “Since [-] is dead, I feel less worthy”) on 6-point scales varying from 0 =  
22 disagree strongly through 5 = agree strongly. The psychometric properties have been  
23 positively evaluated in prior research(14).  
24  
25  
26  
27  
28  
29  
30

31  
32 Avoidance is measured with the Depressive and Anxious Avoidance in Prolonged  
33 Grief Questionnaire (DAAPGQ)(50). The depressive avoidance subscale consists of 5 items  
34 (e.g. ‘Since [-] is dead, I do much less of the things that I used to enjoy.’) and the anxious  
35 avoidance subscale consists of 4 items (e.g., ‘I avoid to dwell on painful thoughts and  
36 memories connected to his/her death.’). Participants answer each item on an 8-point scale  
37 with 0 = not at all true for me, and 7 = completely true for me. The DAAPGQ has adequate  
38 psychometric properties(50).  
39  
40  
41  
42  
43  
44  
45  
46  
47  
48  
49

50 State anger is assessed with the 15-item state anger subscale of the State-Trait Anger  
51 Expression Inventory-2 (STAXI-2)(51) (Dutch version:(52)). Participants are asked to rate on  
52 4-point Likert scales (1 = not at all and 4 = extremely) how angry they feel right now (e.g., “I  
53 feel annoyed”). The STAXI-2 is a valid and reliable measure to assess state anger(52).  
54  
55  
56  
57  
58  
59  
60



1  
2  
3 A sense of unrealness is measured with the 5-item Experienced Unrealness Scale(17).  
4  
5 Participants are asked to rate their agreement with each item (e.g., “I still can hardly imagine  
6  
7 that [-] will never be here again”) on 8-point scales (0 = not at all true for me 7 = completely  
8  
9 true for me). This instrument demonstrated adequate psychometric properties(17).  
10  
11  
12

13  
14 Self-efficacy is assessed with the General Self-Efficacy Scale (GSES)(53). The GSES is a  
15  
16 10-item measure. Participants are asked to rate their agreement with each item (e.g., “I can  
17  
18 solve most problems if I invest the necessary effort.”) on a 4-point scale (1 = completely not  
19  
20 true, 4 = completely true). The GSES has shown excellent reliability and validity(53).  
21  
22  
23

24  
25 Quality of the therapeutic alliance is measured with the 12-item Work Alliance  
26  
27 Inventory-Short Form, Client Version and Therapist Version after session 4 (WAI-SF)(54)  
28  
29 (Dutch version:(55). The WAI-SF consists of 12 items (e.g., Client version: “We agree on what  
30  
31 is important for me to work on”, Therapist Version: “We are working towards mutually  
32  
33 agreed upon goals.”) that are rated on 5-point scales (1 = never and 5 = always). Higher total  
34  
35 scores indicate a higher quality of the therapeutic alliance as perceived by the participant  
36  
37 and therapist. The WAI-SF is a reliable and valid assessment tool(56).  
38  
39  
40  
41

#### 42 *Other measures*

43  
44

45  
46 Background characteristics (i.e., gender, age, and educational level, kinship to the deceased,  
47  
48 and time since loss) and accident-related stressors (i.e., single vs. multiple loss, witnessed  
49  
50 the accident, and status of legal trial) will be assessed with single items.  
51  
52  
53

54  
55 Participants are allowed to receive other forms of psychosocial, instrumental or legal  
56  
57 support during participation in the trial. Using a single question we will assess whether the  
58  
59 participants received other forms of psychosocial professional support. The following  
60

1  
2  
3 question will be used: “During the past 12 weeks/8 weeks (for T2 and T3, respectively) did  
4 you receive additional psychological professional support from a psychologist, therapist or  
5 psychiatrist other than the (online) therapist from the TrafVic-study?” We will also include  
6 two dichotomous items (yes/no) at T1 to assess psychological support received prior to  
7 participation in the study, namely: “Did you ever receive support from a psychologist,  
8 therapist or psychiatrist, for your own emotional/mental problems, prior to the loss of your  
9 loved one due to a traffic accident?” and “Did you ever receive support from a psychologist,  
10 therapist or psychiatrist, for your own emotional/mental problems, related to the loss of  
11 your loved one due to a traffic accident?”  
12  
13  
14  
15  
16  
17  
18  
19  
20  
21  
22  
23  
24  
25  
26  
27  
28

### 29 **Statistical analyses**

30  
31  
32 To examine the differences in reductions of symptom levels of PCBD, PTSD, and depression  
33 from pre- to post-treatment/waiting period between the conditions (online CBT vs. waitlist),  
34 three independent multi-level models will be built (Hypothesis 1). Symptom levels of PCBD,  
35 PTSD, and depression will consecutively be included as dependent variables and condition  
36 (online CBT vs. waitlist controls), time, and time x condition (interaction term) as predictor  
37 variables, taking into account that repeated observations (level 1) are nested within  
38 individuals (level 2), and within households (level 3; if applicable). Additionally, relevant  
39 background, loss-related variables, and use of co-interventions (yes/no) during participation  
40 in our study, will be included in the analysis as covariates. Deviance tests will be used to  
41 examine whether inclusion of these covariates improves model fit(57). Data of all  
42 participants entering the study will be included in all analyses (i.e., intention-to-treat  
43 analysis). Furthermore, percentages of people meeting diagnostic criteria for PCBD, PTSD,  
44  
45  
46  
47  
48  
49  
50  
51  
52  
53  
54  
55  
56  
57  
58  
59  
60

1  
2  
3 and clinically relevant depression will be calculated for each measurement occasion and  
4  
5 percentages of people reporting reliable change scores for each outcome measure, using a  
6  
7 formula from Jacobson and Truax(58, p. 14), will be reported.  
8  
9

10  
11 To examine to what extent symptom improvement after treatment is related to  
12  
13 improvement in possible correlates of change, residual gain scores will be calculated for all  
14  
15 outcome measures (i.e., PCBD, PTSD, and depression) and possible correlates of change (i.e.,  
16  
17 negative cognitions, avoidance behaviors, state anger, a sense of unrealness, and self-  
18  
19 efficacy). Following previous research (cf. (59)), residual gain scores will be calculated by  
20  
21 subtracting the standardized combined pre-treatment scores of both conditions (T1 data  
22  
23 from immediate treatment condition and T1b data from waitlist condition) multiplied by the  
24  
25 correlation coefficient between standardized combined pre-treatment scores and  
26  
27 standardized post-treatment (or follow-up) scores from standardized post-treatment (or  
28  
29 follow up) scores. To test hypothesis 2a, multiple regression analyses will be conducted to  
30  
31 examine the associations between residual gain scores of PCBD, PTSD, or depression and  
32  
33 residual gain scores of negative cognitions, avoidance behaviors, state anger, a sense of  
34  
35 unrealness, and self-efficacy.  
36  
37  
38  
39  
40  
41  
42  
43

44 To achieve research aim 2b, multiple regression analyses will be used to examine to  
45  
46 what extent residual gain scores of PCBD, PTSD, and depression varies as function of a)  
47  
48 background characteristics, including gender (male/female), age (in years), and educational  
49  
50 level (low/high), kinship to the deceased (child/spouse vs other), and time since loss (in  
51  
52 years) and b) accident-related stressors, including number of losses (single vs multiple),  
53  
54 witnessing the accident (yes/no), and status of legal trial (not applicable/on-  
55  
56  
57  
58  
59  
60

1  
2  
3 going/completed). Condition (intervention vs. waitlist controls) will be added as a covariate  
4  
5 to fulfill research aim 2a and 2b.  
6  
7

8  
9 To achieve the third research aim, a) differences in therapeutic alliance scores will be  
10  
11 assessed between people who completed and dropped out of treatment and b) multiple  
12  
13 regression analyses will be used to examine to what extent symptom improvement in PCBD,  
14  
15 PTSD, and depression is related to therapeutic alliance (from both participant and therapist  
16  
17 perspectives).  
18  
19

## 20 21 22 **Ethics and dissemination** 23

24  
25 The initial plan for this study was to conduct a three-arm (face-to-face CBT, online CBT, and  
26  
27 waiting list) RCT to examine the effectiveness of face-to-face CBT (vs. waitlist controls) *and*  
28  
29 online CBT (vs. waitlist controls). This study has been approved by the Medical Ethics Review  
30  
31 Board of the University Medical Center Groningen (METc UMCG: ID number: M20.252121).  
32  
33 Due to the COVID-19 outbreak we had to change our study protocol, because face-to-face  
34  
35 contact with a therapist was not possible because of social distancing measures. Instead of  
36  
37 comparing the effects of online and face-to-face CBT with waitlist controls, we changed the  
38  
39 design of the study by comparing the effects of online CBT vs. waitlist controls before  
40  
41 enrolment of participants took place. This amendment to our study has been approved by  
42  
43 the same ethics committee.  
44  
45  
46  
47  
48  
49

50  
51 The study will be conducted according to the principles of the Declaration of Helsinki  
52  
53 (8th version, 2013) and in accordance with the Medical Research Involving Human Subjects  
54  
55 Act. Collected data will be handled confidentially, according to the EU General Data  
56  
57 Protection Regulation and the Dutch Act on Implementation of the General Data Protection  
58  
59  
60

1  
2  
3 Regulation. Unidentifiable data from this trial will be stored in data repositories from the  
4  
5 University of Groningen and Utrecht University.  
6  
7

8  
9 Findings of this RCT will be disseminated among participants by means of a  
10  
11 newsletter. If shown to be effective, the online framework will be made publicly accessible,  
12  
13 so that it can benefit other bereaved people. Findings will also be disseminated among lay  
14  
15 people by uploading the newsletters on our website ([www.rouwnaverkeersongeval.nl](http://www.rouwnaverkeersongeval.nl)) and  
16  
17 through media performances. Our findings will be presented to our collaborators, including  
18  
19 non-governmental organizations and (peer-)support organizations for bereaved people.  
20  
21 Treatment materials will also be made available upon request. Lastly, colleagues will be  
22  
23 informed about our findings during presentations at (inter)national conferences and  
24  
25 publications in scientific journals.  
26  
27  
28  
29

### 30 31 **Patient and public involvement** 32

33  
34 At the start of this project an advisory committee was established. This committee includes  
35  
36 someone who lost a significant other after a traffic accident, a lawyer with expertise in  
37  
38 supporting bereaved people after traffic accidents, and representatives of Victim Support  
39  
40 the Netherlands and Fund Victim Support. This committee was involved in the development  
41  
42 of the research questions, outcomes measures, and design of the study by reading and  
43  
44 commenting on drafts of our research proposal and study-protocol. This committee pilot  
45  
46 tested the questionnaires and was involved in the development of recruitment materials,  
47  
48 recruitment strategies, and information materials for participants by reading, revising, and  
49  
50 approving the drafts. This committee helps the research team in recruiting participants by  
51  
52 sharing information about this study in their own professional network. The advisory  
53  
54 committee is not involved in conducting the study or development of treatment materials.  
55  
56  
57  
58  
59  
60

1  
2  
3 The committee will support the research team when disseminating the study findings among  
4 relevant audiences by help writing and reviewing newsletters and press releases.  
5  
6  
7

## 8 **Discussion**

9  
10  
11  
12 The relatively few RCTs among general bereaved people with elevated grief levels indicate  
13 that grief-specific CBT-based interventions yield the largest effects on post-loss mental  
14 health compared with a waiting list(21–24). RCTs evaluating face-to-face or online treatment  
15 effects for people with elevated mental health complaints after confrontation with  
16 sudden/violent losses are lacking, with the exception of two studies that compared face-to-  
17 face EMDR plus CBT against waitlist controls(40,59). Given that traumatically bereaved  
18 people are at risk for PCBD and comorbid PTSD and depression(8), it seems particularly  
19 relevant to develop evidence-based interventions for this population.  
20  
21  
22  
23  
24  
25  
26  
27  
28  
29  
30

31  
32 This will be the first RCT to examine the effectiveness of online CBT in a sample  
33 exclusively comprised of people who experienced a traumatic death. We are not able to test  
34 whether the online CBT has equal effects as face-to-face CBT. Nonetheless, the findings are  
35 expected to yield important insights in the effects of online CBT. In this RCT, the online  
36 treatment is designed to be as similar as possible to face-face CBT in terms of treatment  
37 content, treatment duration, and experience and training of therapists. When we find effect  
38 sizes for online CBT that are similar to effect sizes found in earlier studies for face-to-face  
39 CBT, delivering CBT online can be considered as supplement to face-to-face treatment, in  
40 particular when barriers to face-to-face treatments, such as waiting lists and travel expenses,  
41 are experienced.  
42  
43  
44  
45  
46  
47  
48  
49  
50  
51  
52  
53  
54  
55

56  
57 We will also examine potential correlates of change. These analyses, examining the  
58 associations between reductions in symptoms levels and among others negative cognitions  
59  
60

1  
2  
3 and avoidance behaviors, will provide insights in potential underlying therapeutic processes  
4  
5 to foster recovery from traumatic loss. These insights are deemed important to design  
6  
7 treatments that more effectively target these correlates of change. We also expect to  
8  
9 improve our knowledge on for whom (e.g., women or people who are more remotely  
10  
11 bereaved) grief-specific CBT works best. Findings on these potential correlates of change are  
12  
13 necessary to improve treatments given that a maximum of 42% of bereaved people report  
14  
15 clinically relevant reductions in grief levels after treatment(21).  
16  
17  
18  
19  
20

21           Lastly, the role of therapeutic alliance on therapy outcomes will be explored. Prior  
22  
23 research in bereaved people has shown that greater therapeutic alliance, from the  
24  
25 perspective of the client, at week 4 of a face-to-face grief-specific treatment, was related to  
26  
27 greater reductions in grief levels. This therapeutic alliance-grief relationship was not  
28  
29 significant for a non-grief specific treatment(60). Our exploration of this association, from  
30  
31 the perspective of client *and* therapist, may for the first time shed light on therapeutic  
32  
33 processes in online CBT for traumatic grief.  
34  
35  
36  
37  
38

39           An anticipated limitation of our RCT is the self-selected sample. It is possible that  
40  
41 people who are more open towards innovative technology in general(61) and who received  
42  
43 support prior to the loss(32) are more likely to sign up for this study, limiting the  
44  
45 generalizability of findings emerging from this study. Due to the absence of an active control  
46  
47 group (e.g., face-to-face CBT) we are not able to test the effects of online CBT compared  
48  
49 with an alternative treatment. Furthermore, we will use self-report measures instead of  
50  
51 diagnostic interviews, which may increase the risk of overestimating symptom levels(62). In  
52  
53 addition, participants might experience difficulties with completing the mid-treatment  
54  
55 assessment of the therapeutic relationship because the video-therapist that provides  
56  
57  
58  
59  
60

1  
2  
3 information through recorded video messages (interaction between video-therapist and  
4  
5 participant is not possible) might be a different person than the online therapist who  
6  
7 provides personal written feedback twice a week. Although the instructions of the  
8  
9 therapeutic alliance measure explicitly refer to the interaction with the online therapist (not  
10  
11 the video-therapist), this might still be confusing for some participants. Another potential  
12  
13 limitation of this trial relates to the fact that the operationalization and assessment of grief  
14  
15 as a disorder is still under debate(63–65). For instance, PCBD, included as “condition for  
16  
17 further study” in the DSM-5, is likely to be changed in a revision of the DSM. To maximize  
18  
19 diagnostic compatibility, we added four items, corresponding to ICD-11 PGD criteria, to the  
20  
21 TGI-SR, enabling operationalization of our primary outcome measure in terms of diagnoses of  
22  
23 pathological grief according to both the DSM-5 and the ICD-11.  
24  
25  
26  
27  
28  
29

30  
31 To conclude, this RCT will provide new insights in effectiveness of online CBT for  
32  
33 people who experience clinically relevant distress after bereavement due to a traffic  
34  
35 accident, as well as in potential correlates of therapeutic change. As trials to date have  
36  
37 primarily focused on effects of face-to-face treatment for non-traumatically bereaved  
38  
39 people, our findings are expected to provide a valuable addition to the knowledge base on  
40  
41 treating severely distressed bereaved people.  
42  
43  
44  
45  
46  
47  
48  
49  
50  
51  
52  
53  
54  
55  
56  
57  
58  
59  
60



## References

1. World Health Organization. The top 10 causes of death [Internet]. 2019 [geciteerd 14 oktober 2019]. Beschikbaar op: <https://www.who.int/news-room/fact-sheets/detail/the-top-10-causes-of-death>
2. Lundorff M, Holmgren H, Zachariae R, Farver-Vestergaard I, O'Connor M. Prevalence of prolonged grief disorder in adult bereavement: A systematic review and meta-analysis. *J Affect Disord.* 2017;212:138–49.
3. Onrust SA, Cuijpers P. Mood and anxiety disorders in widowhood: a systematic review. *Aging Ment Health.* 2006;10(4):327–34.
4. American Psychiatric Association. *Diagnostic and statistical manual of mental disorders (5th ed.)*. Arlington, VA: American Psychiatric Publishing; 2013.
5. Boelen PA, van de Schoot R, van den Hout MA, de Keijser J, van den Bout J. Prolonged Grief Disorder, depression, and posttraumatic stress disorder are distinguishable syndromes. *J Affect Disord.* 2010;125(1–3):374–8.
6. Lenferink LIM, Nickerson A, de Keijser J, Smid GE, Boelen PA. Trajectories of grief, depression, and posttraumatic stress in disaster-bereaved people. *Depress Anxiety.* 2018;
7. Malgaroli M, Maccallum F, Bonanno GA. Symptoms of persistent complex bereavement disorder, depression, and PTSD in a conjugally bereaved sample: a network analysis. *Psychol Med.* 2018;48(14):2439–48.

- 1  
2  
3 8. Heeke C, Kampisiou C, Niemeyer H, Knaevelsrud C. A systematic review and meta-  
4  
5 analysis of correlates of prolonged grief disorder in adults exposed to violent loss. *Eur J*  
6  
7 *Psychotraumatology* [Internet]. 2019 [geciteerd 14 oktober 2019];10(1). Beschikbaar  
8  
9 op: <https://www.ncbi.nlm.nih.gov/pmc/articles/PMC6442112/>  
10  
11  
12
- 13  
14 9. Kristensen P, Weisæth L, Heir T. Bereavement and mental health after sudden and  
15  
16 violent losses: a review. *Psychiatry*. 2012;75(1):76–97.  
17  
18
- 19  
20 10. Eisma, M.C., de Keijser, J. Nabestaanden van verkeersongevallen. In: de Keijser, J.,  
21  
22 Boelen, P.A., Smid, G.E., redacteuren. *Handboek traumatische rouw*. Amsterdam:  
23  
24 Uitgeverij Boom; 2018. p. 104–16.  
25  
26
- 27  
28 11. Boelen PA, de Keijser J, Smid G. Cognitive–behavioral variables mediate the impact of  
29  
30 violent loss on post-loss psychopathology. *Psychol Trauma Theory Res Pract Policy*.  
31  
32 2015;7(4):382–90.  
33  
34
- 35  
36 12. Boelen PA, van den Hout MA, van den Bout J. A Cognitive-Behavioral Conceptualization  
37  
38 of Complicated Grief. *Clin Psychol Sci Pract*. 2006;13(2):109–28.  
39  
40
- 41  
42 13. Janoff-Bulman R. Assumptive worlds and the stress of traumatic events: Applications of  
43  
44 the schema construct. *Soc Cogn*. 1989;7(2):113–36.  
45  
46
- 47  
48 14. Boelen PA, Lensvelt-Mulders GJLM. Psychometric Properties of the Grief Cognitions  
49  
50 Questionnaire (GCQ). *J Psychopathol Behav Assess*. 2005;27(4):291–303.  
51  
52
- 53  
54 15. Foa EB, Riggs DS, Massie ED, Yarczower M. The impact of fear activation and anger on  
55  
56 the efficacy of exposure treatment for posttraumatic stress disorder. *Behav Ther*.  
57  
58 1995;26(3):487–99.  
59  
60

- 1  
2  
3 16. Tehrani, N. Road victim trauma: an investigation of the impact on the injured and  
4  
5 bereaved. *Couns Psychol Q.* 2004;17(4):361–73.  
6  
7
- 8  
9 17. Boelen PA. A Sense of ‘unrealness’ about the death of a loved-one: An exploratory  
10  
11 study of its role in emotional complications among bereaved individuals. *Appl Cogn*  
12  
13 *Psychol.* 2010;24(2):238–51.  
14  
15
- 16  
17 18. Boelen PA. “It feels as if she might return one day”: A sense of unrealness as a predictor  
18  
19 of bereavement-related emotional distress / “Tengo la sensación de que ella puede  
20  
21 volver algún día”: la sensación de irrealidad como un predictor del sufrimiento  
22  
23 emocional relacionado con la pérdida. *Estud Psicol.* 2017;38(3):734–51.  
24  
25
- 26  
27 19. Benight CC. Social cognitive theory of posttraumatic recovery: the role of perceived  
28  
29 self-efficacy. *Behav Res Ther.* 2004;42(10):1129–48.  
30  
31
- 32  
33 20. Smid GE, Kleber RJ, Rie SM de la, Bos JBA, Gersons BPR, Boelen PA. Brief Eclectic  
34  
35 Psychotherapy for Traumatic Grief (BEP-TG): toward integrated treatment of symptoms  
36  
37 related to traumatic loss. *Eur J Psychotraumatology.* 2015;6(1):27324.  
38  
39
- 40  
41 21. Boelen PA, Smid GE. Disturbed grief: prolonged grief disorder and persistent complex  
42  
43 bereavement disorder. *BMJ.* 2017;357:j2016.  
44  
45
- 46  
47 22. Currier JM, Holland JM, Neimeyer RA. Do CBT-Based Interventions Alleviate Distress  
48  
49 Following Bereavement? A Review of the Current Evidence. *International Journal of*  
50  
51 *Cognitive Therapy.* 2010;3:77–93.  
52  
53
- 54  
55 23. Doering BK, Eisma MC. Treatment for complicated grief: state of the science and ways  
56  
57 forward. *Curr Opin Psychiatry.* 2016;29(5):286–91.  
58  
59  
60

- 1  
2  
3 24. Johannsen M, Damholdt MF, Zachariae R, Lundorff M, Farver-Vestergaard I, O'Connor  
4  
5 M. Psychological interventions for grief in adults: A systematic review and meta-  
6  
7 analysis of randomized controlled trials. *J Affect Disord.* 2019;253:69–86.  
8  
9
- 10  
11 25. Boelen PA, Keijser J de, Hout MA van den, Bout J van den. Factors associated with  
12  
13 outcome of cognitive-behavioural therapy for complicated grief: A preliminary study.  
14  
15 *Clin Psychol Psychother.* 2011;18(4):284–91.  
16  
17
- 18  
19 26. Bryant RA, Kenny L, Joscelyne A, Rawson N, Maccallum F, Cahill C, e.a. Predictors of  
20  
21 treatment response for cognitive behaviour therapy for prolonged grief disorder. *Eur J*  
22  
23 *Psychotraumatology* [Internet]. 2019 [geciteerd 13 oktober 2019];8(6). Beschikbaar op:  
24  
25 <https://www.ncbi.nlm.nih.gov/pmc/articles/PMC6383610/>  
26  
27
- 28  
29 27. Linde K, Treml J, Steinig J, Nagl M, Kersting A. Grief interventions for people bereaved  
30  
31 by suicide: A systematic review. *PloS One.* 2017;12(6):e0179496.  
32  
33
- 34  
35 28. Eisma MC, Boelen PA, van den Bout J, Stroebe W, Schut HAW, Lancee J, e.a. Internet-  
36  
37 Based Exposure and Behavioral Activation for Complicated Grief and Rumination: A  
38  
39 Randomized Controlled Trial. *Behav Ther.* 2015;46(6):729–48.  
40  
41
- 42  
43 29. Kersting A, Dölemeyer R, Steinig J, Walter F, Kroker K, Baust K, e.a. Brief Internet-based  
44  
45 intervention reduces posttraumatic stress and prolonged grief in parents after the loss  
46  
47 of a child during pregnancy: a randomized controlled trial. *Psychother Psychosom.*  
48  
49 2013;82(6):372–81.  
50  
51
- 52  
53 30. Wagner B, Knaevelsrud C, Maercker A. Internet-based cognitive-behavioral therapy for  
54  
55 complicated grief: a randomized controlled trial. *Death Stud.* 2006;30(5):429–53.  
56  
57  
58  
59  
60

- 1  
2  
3 31. Baumeister H, Reichler L, Munzinger M, Lin J. The impact of guidance on Internet-based  
4  
5 mental health interventions — A systematic review. *Internet Interv.* 2014;1(4):205–15.  
6  
7
- 8  
9 32. Lichtenthal WG, Corner GW, Sweeney CR, Wiener L, Roberts KE, Baser RE, e.a. Mental  
10  
11 Health Services for Parents Who Lost a Child to Cancer: If We Build Them, Will They  
12  
13 Come? *J Clin Oncol Off J Am Soc Clin Oncol.* 2015;33(20):2246–53.  
14  
15
- 16  
17 33. Andersson G, Titov N. Advantages and limitations of Internet-based interventions for  
18  
19 common mental disorders. *World Psychiatry.* 2014;13(1):4–11.  
20  
21
- 22  
23 34. Eisma MC, Boelen PA, Lenferink LIM. Prolonged grief disorder following the Coronavirus  
24  
25 (COVID-19) pandemic. *Psychiatry Res.* 2020;288:113031.  
26  
27
- 28  
29 35. Melville KM, Casey LM, Kavanagh DJ. Dropout from Internet-based treatment for  
30  
31 psychological disorders. *Br J Clin Psychol.* 2010;49(Pt 4):455–71.  
32  
33
- 34  
35 36. Pihlaja S, Stenberg J-H, Joutsenniemi K, Mehik H, Ritola V, Joffe G. Therapeutic alliance  
36  
37 in guided internet therapy programs for depression and anxiety disorders - A  
38  
39 systematic review. *Internet Interv.* 2018;11:1–10.  
40  
41
- 42  
43 37. Bordin ES. Theory and research on the therapeutic working alliance: New directions. In:  
44  
45 *The working alliance: Theory, research, and practice.* Oxford, England: John Wiley &  
46  
47 Sons; 1994. p. 13–37. (Wiley series on personality processes).  
48  
49
- 50  
51 38. Cook JE, Doyle C. Working alliance in online therapy as compared to face-to-face  
52  
53 therapy: preliminary results. *Cyberpsychology Behav Impact Internet Multimed Virtual*  
54  
55 *Real Behav Soc.* 2002;5(2):95–105.  
56  
57  
58  
59  
60

- 1  
2  
3 39. Sucala M, Schnur JB, Constantino MJ, Miller SJ, Brackman EH, Montgomery GH. The  
4  
5 therapeutic relationship in e-therapy for mental health: A systematic review. *J Med*  
6  
7  
8 Internet Res. 2012;14(4):e110.  
9  
10  
11 40. van Denderen M, de Keijser J, Stewart R, Boelen PA. Treating complicated grief and  
12  
13 posttraumatic stress in homicidally bereaved individuals: A randomized controlled trial.  
14  
15  
16 Clin Psychol Psychother. 2018;  
17  
18  
19 41. Lenferink LIM, de Keijser J, Wessel I, Boelen PA. Cognitive behavioural therapy and  
20  
21 mindfulness for relatives of missing persons: A pilot study. *Pilot Feasibility Stud.*  
22  
23  
24 2019;5(1):93.  
25  
26  
27 42. Boelen PA, Bout J van den. Protocollaire behandeling van persisterende complexe  
28  
29 rouwstoornis. In: Keijsers, G., Minnen, A. van, Verbraak, M., Hoogduin, K., Emmelkamp,  
30  
31 P., redacteuren. Protocollaire behandelingen voor volwassenen met psychische  
32  
33 klachten. 1ste dr. Amsterdam: Boom; 2017.  
34  
35  
36  
37  
38 43. Boelen PA, Smid GE. The Traumatic Grief Inventory Self-Report Version (TGI-SR):  
39  
40 Introduction and Preliminary Psychometric Evaluation. *J Loss Trauma.* 2017;22(3):196–  
41  
42  
43 212.  
44  
45  
46  
47 44. World Health Organization. ICD-11. Prolonged Grief Disorder Criteria [Internet]. 2018  
48  
49 [geciteerd 14 oktober 2019]. Beschikbaar op: <https://icd.who.int/browse11/l->  
50  
51 [m/en#/http://id.who.int/icd/entity/1183832314](https://icd.who.int/browse11/l-m/en#/http://id.who.int/icd/entity/1183832314)  
52  
53  
54  
55  
56  
57  
58  
59  
60

- 1  
2  
3 45. Boelen PA, Djelantik AAAMJ, de Keijser J, Lenferink LIM, Smid GE. Further validation of  
4  
5 the Traumatic Grief Inventory-Self Report (TGI-SR): A measure of persistent complex  
6  
7 bereavement disorder and prolonged grief disorder. *Death Stud.* 2019;43(6):351–64.  
8  
9  
10  
11 46. Blevins CA, Weathers FW, Davis MT, Witte TK, Domino JL. The Posttraumatic Stress  
12  
13 Disorder Checklist for DSM-5 (PCL-5): Development and Initial Psychometric Evaluation.  
14  
15 *J Trauma Stress.* 2015;28(6):489–98.  
16  
17  
18  
19 47. Boeschoten, M.A., Bakker, A., Jongedijk, R.A., Olff, M. PTSS checklist voor de DSM-5  
20  
21 (PCL-5). Diemen: Arq Nationaal Psychotrauma Centrum; 2014.  
22  
23  
24  
25 48. Zigmond AS, Snaith RP. The hospital anxiety and depression scale. *Acta Psychiatr Scand.*  
26  
27 1983;67(6):361–70.  
28  
29  
30  
31 49. Spinhoven PH, Ormel J, Sloekers PPA, Kempen GIJM. A validation study of the Hospital  
32  
33 Anxiety and Depression scale (HADS) in different groups of Dutch subjects. *Psychol*  
34  
35 *Med.* 1997;27(2):363–70.  
36  
37  
38  
39 50. Boelen PA, van den Bout J. Anxious and depressive avoidance and symptoms of  
40  
41 prolonged grief, depression, and post-traumatic stress disorder. *Psychol Belg.*  
42  
43 2010;50(1–2):49–67.  
44  
45  
46  
47 51. Spielberger, C.D. State-Trait Anger Expression Inventory-2. *Psychological Assessment*  
48  
49 *Resources;* 1999.  
50  
51  
52  
53 52. Lievaart M, Franken IHA, Hovens JE. Anger Assessment in Clinical and Nonclinical  
54  
55 Populations: Further Validation of the State-Trait Anger Expression Inventory-2. *J Clin*  
56  
57 *Psychol.* 2016;72(3):263–78.  
58  
59  
60

- 1  
2  
3 53. Schwarzer, R., Jerusalem, M. Generalized self-efficacy scale. In: Weinman, J., Wright, S.,  
4  
5  
6 Johnston, M., redacteurs. Measures in health psychology: A user's portfolio Causal  
7  
8 and control beliefs. Windsor, UK: Nfer-Nelson; 1995. p. 35–7.  
9  
10  
11 54. Horvath AO, Greenberg LS. Development and validation of the Working Alliance  
12  
13 Inventory. J Couns Psychol. 1989;36(2):223–33.  
14  
15  
16  
17 55. Vertommen, H., Vervaeke, G. Nederlandstalige experimentele vertaling van de Working  
18  
19 Alliance Inventory van Horvath en Greenberg. Leuven: KU; 1990.  
20  
21  
22  
23 56. Munder T, Wilmers F, Leonhart R, Linster HW, Barth J. Working Alliance Inventory-Short  
24  
25 Revised (WAI-SR): psychometric properties in outpatients and inpatients. Clin Psychol  
26  
27 Psychother. 2010;17(3):231–9.  
28  
29  
30  
31 57. Snijders, T.A.B., Bosker, R.J. Deviance tests. In: Snijders, T.A.B., Bosker, R.J.,  
32  
33 redacteurs. Multilevel analysis. London: SAGE Publications Ltd; 2012. p. 97–8.  
34  
35  
36  
37 58. Jacobson NS, Truax P. Clinical significance: A statistical approach to defining meaningful  
38  
39 change in psychotherapy research. J Consult Clin Psychol. 1991;59(1):12–9.  
40  
41  
42  
43 59. Lenferink LIM, de Keijser J, Smid GE, Boelen PA. Cognitive therapy and EMDR for  
44  
45 reducing psychopathology in bereaved people after the MH17 plane crash: Findings  
46  
47 from a randomized controlled trial. Traumatology. 2020;  
48  
49  
50  
51 60. Glickman K, Shear, K.M., Wall MM. Therapeutic Alliance and Outcome in Complicated  
52  
53 Grief Treatment. Int J Cogn Ther. 2018;11(2):222–33.  
54  
55  
56  
57 61. Arjadi R, Nauta MH, Bockting CLH. Acceptability of internet-based interventions for  
58  
59 depression in Indonesia. Internet Interv. 2018;13:8–15.  
60



- 1  
2  
3 62. Lim GY, Tam WW, Lu Y, Ho CS, Zhang MW, Ho RC. Prevalence of Depression in the  
4  
5 Community from 30 Countries between 1994 and 2014. *Sci Rep*. 2018;8(1):2861.  
6  
7  
8  
9 63. Lenferink, L.I.M., Boelen, P.A., Smid, G.E., Paap, M.C.S. The importance of harmonising  
10  
11 diagnostic criteria sets for pathological grief. *British Journal of Psychiatry*. in press;  
12  
13  
14  
15 64. Maciejewski PK, Prigerson HG. Prolonged, but not complicated, grief is a mental  
16  
17 disorder. *Br J Psychiatry*. 2017;211(4):189–91.  
18  
19  
20  
21 65. Wakefield JC. Should prolonged grief be reclassified as a mental disorder in DSM-5?:  
22  
23 reconsidering the empirical and conceptual arguments for complicated grief disorder. *J*  
24  
25 *Nerv Ment Dis*. 2012;200(6):499–511.  
26  
27  
28  
29  
30  
31  
32  
33

### 34 **Authors' contributions**

35  
36 JdK is principal investigator. LL is executive researcher. JdK, PB, ME, and GS are grant  
37  
38 holders. LL developed the study design and wrote the ethics proposal and drafts of the  
39  
40 manuscript. JdK, ME, GS, and PB read, revised, and approved the drafts of the study design,  
41  
42 ethics proposal, and the manuscript.  
43  
44  
45  
46

### 47 **Funding statement**

48  
49 Fund Victim Support subsidized this work (grant number: not applicable).  
50  
51

### 52 **Competing Interests Statement**

53  
54  
55  
56 All authors declare to have no competing interests.  
57  
58  
59  
60

1  
2  
3 **Figure caption/legend**  
4

5 **Figure 1.** Design of RCT  
6

7  
8 *Note.* CBT = cognitive behavioral therapy  
9  
10  
11  
12  
13  
14  
15  
16  
17  
18  
19  
20  
21  
22  
23  
24  
25  
26  
27  
28  
29  
30  
31  
32  
33  
34  
35  
36  
37  
38  
39  
40  
41  
42  
43  
44  
45  
46  
47  
48  
49  
50  
51  
52  
53  
54  
55  
56  
57  
58  
59  
60

For peer review only

1  
2  
3  
4  
5  
6  
7  
8  
9  
10  
11  
12  
13  
14  
15  
16  
17  
18  
19  
20  
21  
22  
23  
24  
25  
26  
27  
28  
29  
30  
31  
32  
33  
34  
35  
36  
37  
38  
39  
40  
41  
42  
43  
44  
45  
46  
47  
48  
49  
50  
51  
52  
53  
54  
55  
56  
57  
58  
59  
60



Figure 1. Design of RCT  
356x148mm (96 x 96 DPI)

## Supplementary File

### Information for participants

Subject: Participation in study on the treatment of grief after a traffic accident

Dear sir/madam,

We ask you to take part in a scientific study. This participation is voluntary. In order to take part we do need your permission. You receive this information because you filled in a questionnaire some time ago, mapping the emotional consequences of the death of a loved one due to a traffic accident. You have indicated that you may be interested in taking part in a follow-up study exploring the effects of a treatment to learn to cope better with the death of your loved one.

Before you decide whether you want to take part in this study, you receive an explanation of what the study entails. Read this information carefully and ask the researcher to explain if you have questions.

#### 1. General Information

This study is conducted by the University of Groningen, Utrecht University and Stichting Centrum '45. The study is financed by the Fonds Slachtofferhulp (Victim Support Fund). The study consists of participation in an online psychological treatment. The treatment is provided by therapists in various practices across the Netherlands. The medical-ethical review committee of the Universitair Medisch Centrum Groningen (Academic Medical Centre Groningen) has approved this study.

#### 2. Purpose of the study

Those left behind after a traffic accident often indicate that the help provided does not sufficiently connect to their experiences. Therefore a treatment has been developed that is specifically intended for the partner, relatives and friends of someone who died due to a traffic accident. You can discuss with the therapist how you are coping with the loss and what the consequences of this loss are in your life. The aim of the treatment is to cope better with the loss. The treatment is part of a scientific study. The purpose of the study is to explore whether treatment leads to a reduction in emotional problems for those who lost someone due to a traffic accident.

#### 3. Background of the study

During the treatment cognitive behavioural therapy will be used. Previous research has shown that cognitive behavioural therapy is the most effective treatment for reducing emotional problems after the loss of a loved one due to a natural cause (for instance illness). Cognitive behavioural therapy is mainly applied during individual sessions with a therapist (face-to-face treatment). Research has shown that cognitive behavioural therapy, offered via the internet (online treatment), also seems to be suitable for reducing problems after a natural death. More research is needed to find out whether this online version of cognitive behavioural therapy is also suitable for those who lost someone due to a traffic accident. The purpose of this study is to find out whether online cognitive behavioural therapy is accompanied by a reduction of emotional problems after the death of a loved one due to a traffic accident.

The online treatment is provided individually and consists of eight modules which you go through in twelve weeks. You will then have online contact with a therapist who will guide you during the treatment. In the Netherlands, a network of therapists has been trained in the online treatment of people

1  
2  
3 who lost someone due to a traffic accident. The therapists work at several treatment centres. The online  
4 treatment is offered by Therapieland. Therapieland is a provider of psychological care via the internet.  
5  
6

#### 7 **4. What participation entails**

8 If you take part, this will take at least 20 weeks in total for you.  
9

##### 10 *Screening*

11 First we will determine whether you can take part. You will be asked to fill in a questionnaire. The  
12 questionnaire contains questions about emotional problems you may experience in response to the  
13 passing away of your loved one due to a traffic accident. Also, questions are asked about previous  
14 psychological help you may have received. The questionnaire is used to get a picture of the degree to  
15 which you experience emotional problems.  
16

17 If your completed questionnaire shows that you experience relatively few emotional problems, you  
18 cannot take part in the study. You also cannot take part in the study if you have no access to the internet.  
19 If your answers show that the treatment offered is not suitable for you, an alternative treatment will be  
20 looked for in consultation with you.  
21

22 It is possible that you filled out a questionnaire on this topic before. As problems can change over time,  
23 we ask you to fill in a questionnaire once more. In this way we get a picture of the problems you are  
24 experiencing at the moment.  
25

##### 26 *Treatment*

27 In order to be able to determine the effect of the treatment, participants are assigned to one of two  
28 groups. The first group will start with the online treatment as soon as possible after registration. The  
29 second group will start with the online treatment after a waiting period of 20 weeks. By adding a waitlist  
30 group it can be determined that a reduction of problems is actually the result of the treatment, and not  
31 of the passage of time. Which group you are assigned to will be determined by drawing lots. You and  
32 we do not have any influence on the draw. We will let you know when your treatment starts.  
33  
34  
35

##### 36 *Measurements*

37 Before the treatment can start, you will be asked to fill in a questionnaire. This questionnaire will focus  
38 on the problems you experience. We map these in order to be able to determine whether the treatment  
39 might help you.  
40

41 The therapist who will guide your online treatment will be informed of the results of this questionnaire  
42 beforehand. In order to determine to what extent the treatment helps you, we ask you to fill in a  
43 questionnaire not only beforehand, but also once during the treatment, after the last treatment session,  
44 and 8 weeks after the treatment. People assigned to the waiting group will be asked to fill in an additional  
45 questionnaire after 12 weeks and 20 weeks of waiting. In this way it can be determined whether the  
46 treatment has been effective and what the short and long term effects of the treatment are. The filling  
47 in will take approximately 10 to 30 minutes per measurement.  
48  
49  
50

#### 51 **5. What is expected from you**

52 In order to ensure that the study runs smoothly it is important that you adhere to the following  
53 agreements. These agreements are that you:  
54

- 55 ● contact the researcher in case of problems (the contact details are listed at the end of the  
56 information letter);
- 57 ● keep all appointments with your therapist;
- 58 ● fill in the questionnaires before and after the treatment.  
59  
60

Besides, it is important that you contact the researcher if:

- your contact information changes
- you no longer wish to take part in the study

#### **6. Possible negative effects**

During the treatment you will actively engage with your thoughts and feelings about the loss. It is possible that feelings such as grief or loss or fatigue may temporarily increase in intensity. Filling in the questionnaire can also evoke emotional responses. When your problems increase to a great extent, you can contact the researcher via the contact details listed at the end of this letter.

#### **7. Possible advantages and disadvantages**

It is important that you carefully weigh the possible advantages and disadvantages before you decide to take part. The treatment may reduce your emotional problems, but this is not certain. Your participation will contribute to more knowledge about the treatment of emotional problems after the death of a loved one due to a traffic accident.

Disadvantages of taking part in the study may be:

- possible worsening of problems due to taking part in the treatment;
- possible worsening of problems due to filling in the questionnaire.

Participation in the study also means that:

- the study will cost you time;
- you will have to adhere to certain agreements.

These issues have all been described in section 4, 5 and 6 above.

#### **8. If you do not wish to participate or if you wish to stop participating in the study**

You decide whether or not to take part in the study. Participation is voluntary. If you do take part, you can always change your mind and stop participating after all, during the study as well. You do not have to give a reason for stopping. You do have to report this to the researcher immediately. The data collected up to that point will be used for the study.

If there is new information about the study that is important to you, the researcher will let you know this. We will then ask you if you continue to participate.

#### **9. End of the study**

Your participation in the study will end when: you will have filled in the questionnaire 8 weeks after the end of the treatment; you make the choice to stop participating; the researcher considers it better for you to stop participating; the government or the reviewing medical-ethical committee decide to end the study. The entire study will end when all participants are done. After processing all the data, the researcher will inform you of the most important outcomes of the study by means of a newsletter. You can indicate whether you wish to receive this newsletter at the end of the questionnaire.

## 10. Use and storage of your data

For this study your personal data will be collected, used and stored. This concerns data such as your name, address, date of birth and data related to your health. The collection, use and storage of your data is necessary to be able to answer the questions asked in this study and to publish the results. We ask your permission for the use of your data.

### Confidentiality of your data

In order to protect your privacy, your data will get a code. Your name and other data which can identify you directly will be left out from this. Data can only be traced to you with the key to the code. The key to the code will remain safely stored at the local research institution. The data sent to eventual other parties involved only contain the code, but not your name or other data with which you can be identified. In reports and publications on the study the data cannot be traced to you either.

### Access to your data for checks

Some people may get access to all your data at the research location, including the data without code. This is necessary to be able to check whether the study has been done properly and reliably. People who will gain access to your data for checking purposes will be the researchers Lonneke Lenferink, a research assistant and Jos de Keijser, the committee monitoring the safety of the study and international supervising authorities. They will keep your data secret. We ask you to give your permission for this access.

### Data retention period

Your data must be retained at the research location for 15 years. They are stored in order to be able to make new provisions related to this study in the course of this study.

### Withdrawal of permission

You can always withdraw your permission for the use of your personal data again. The research data collected up to the moment you withdraw permission will still be used in the study.

### Further information about your rights regarding data processing

For general information about your rights you can contact the person responsible for processing your personal data. For this study this is Lonneke Lenferink (University of Groningen). In case of questions or complaints regarding the processing of your personal data we recommend that you contact her.

## 11. Insurance for test subjects

An insurance has been taken out for everyone taking part in the study. The insurance covers damage from the study. You can report damage to the researchers.

## 12. Informing family doctor/GP

We do not share information about your participation in the study with your family doctor/GP.

## 13. Compensation for participation

1  
2  
3  
4 Participation in the online treatment is free of charge.  
5  
6

#### 7 **14. Do you have any questions?**

8  
9 In case of general questions regarding the study you can contact the researcher assistant. If you have  
10 complaints about the study, you can discuss this with the researchers or with your treating therapist. If  
11 you prefer not to do this, you can contact the University of Groningen.  
12  
13

#### 14 **15. Signing the consent form**

15  
16 Below you find a 'Declaration of consent for participation in research into the treatment of grief after a  
17 traffic accident', on which you can indicate whether you wish to take part in the study. With your  
18 permission you indicate that you have understood the information and that you agree to participate in  
19 the study.  
20  
21

22  
23 After you have filled in this declaration, you can start filling in the questionnaire. Approximately within  
24 four weeks after filling in the questionnaire we will let you know by email or by phone whether you  
25 qualify for the treatment. When you qualify for treatment, you will receive the outcome of the draw  
26 which indicates whether you have been assigned to a group that can start with the online treatment as  
27 soon as possible, or whether you have been assigned to the group that needs to wait for 20 weeks before  
28 the start of the online treatment.  
29

30  
31 If you have any further questions, you can contact us via the details below.  
32

33 Kind regards,  
34

35  
36 [name research assistant]  
37

38 Research assistant University of Groningen  
39

40  
41  
42 Lonneke Lenferink  
43

44 Post-doctoral researcher University of Groningen and Utrecht University  
45  
46  
47

#### 48 **Contact Details**

49  
50 General questions about the study: [name research assistant], [info@rouwnaverkeersongeval.nl](mailto:info@rouwnaverkeersongeval.nl)  
51

52  
53 Questions regarding the protection of your data, your rights or complaints: please contact Lonneke  
54 Lenferink, [i.m.lenferink@rug.nl](mailto:i.m.lenferink@rug.nl).  
55  
56  
57  
58  
59  
60



1  
2  
3  
4  
5  
6  
7  
8  
9  
10  
11  
12  
13  
14  
15  
16  
17  
18  
19  
20  
21  
22  
23  
24  
25  
26  
27  
28  
29  
30  
31  
32  
33  
34  
35  
36  
37  
38  
39  
40  
41  
42  
43  
44  
45  
46  
47  
48  
49  
50  
51  
52  
53  
54  
55  
56  
57  
58  
59  
60

**Consent Form**  
**for participation in research on treatment of grief after a traffic accident**

- I have read the information letter. I also had the opportunity to ask questions. My questions have been answered adequately. I had enough time to decide whether to participate or not.
- I know that participation is voluntary. I also know that I can decide at any moment not to participate after all or to stop participating in the study. I do not have to give a reason for this.
- I give permission for collecting and using my data to answer the research question of this study.
- I know that some people may gain access to all of my data for the purpose of checks of this study. Those people are listed in this information letter. I give permission for this access by these people.
- I wish to participate in this study.

Name of participant:

Email address:

Phone number:

Signature of participant:

Date: \_\_ / \_\_ / \_\_

---

The researcher, Lonneke Lenferink, hereby declares that the test subject has been fully informed about the aforementioned study.

If information becomes known during the study which might influence the consent of the participant, the participant will be timely informed about this.

# Reporting checklist for protocol of a clinical trial.

Based on the SPIRIT guidelines.

## Instructions to authors

Complete this checklist by entering the page numbers from your manuscript where readers will find each of the items listed below.

Your article may not currently address all the items on the checklist. Please modify your text to include the missing information. If you are certain that an item does not apply, please write "n/a" and provide a short explanation.

Upload your completed checklist as an extra file when you submit to a journal.

In your methods section, say that you used the SPIRIT reporting guidelines, and cite them as:

Chan A-W, Tetzlaff JM, Altman DG, Laupacis A, Gøtzsche PC, Krleža-Jerić K, Hróbjartsson A, Mann H, Dickersin K, Berlin J, Doré C, Parulekar W, Summerskill W, Groves T, Schulz K, Sox H, Rockhold FW, Rennie D, Moher D. SPIRIT 2013 Statement: Defining standard protocol items for clinical trials. *Ann Intern Med.* 2013;158(3):200-207

|                                   |                                                                                                                                 |  | Page   |
|-----------------------------------|---------------------------------------------------------------------------------------------------------------------------------|--|--------|
|                                   | Reporting Item                                                                                                                  |  | Number |
| <b>Administrative information</b> |                                                                                                                                 |  |        |
| Title                             | <a href="#">#1</a> Descriptive title identifying the study design, population, interventions, and, if applicable, trial acronym |  | 1      |

|    |                     |                     |                                                            |     |
|----|---------------------|---------------------|------------------------------------------------------------|-----|
| 1  | Trial registration  | <a href="#">#2a</a> | Trial identifier and registry name. If not yet registered, | 3   |
| 2  |                     |                     | name of intended registry                                  |     |
| 3  |                     |                     |                                                            |     |
| 4  |                     |                     |                                                            |     |
| 5  |                     |                     |                                                            |     |
| 6  | Trial registration: | <a href="#">#2b</a> | All items from the World Health Organization Trial         | n/a |
| 7  | data set            |                     | Registration Data Set                                      |     |
| 8  |                     |                     |                                                            |     |
| 9  |                     |                     |                                                            |     |
| 10 |                     |                     |                                                            |     |
| 11 |                     |                     |                                                            |     |
| 12 | Protocol version    | <a href="#">#3</a>  | Date and version identifier                                | n/a |
| 13 |                     |                     |                                                            |     |
| 14 |                     |                     |                                                            |     |
| 15 | Funding             | <a href="#">#4</a>  | Sources and types of financial, material, and other        | 32  |
| 16 |                     |                     | support                                                    |     |
| 17 |                     |                     |                                                            |     |
| 18 |                     |                     |                                                            |     |
| 19 |                     |                     |                                                            |     |
| 20 | Roles and           | <a href="#">#5a</a> | Names, affiliations, and roles of protocol contributors    | 32  |
| 21 | responsibilities:   |                     |                                                            |     |
| 22 |                     |                     |                                                            |     |
| 23 | contributorship     |                     |                                                            |     |
| 24 |                     |                     |                                                            |     |
| 25 |                     |                     |                                                            |     |
| 26 |                     |                     |                                                            |     |
| 27 |                     |                     |                                                            |     |
| 28 | Roles and           | <a href="#">#5b</a> | Name and contact information for the trial sponsor         | n/a |
| 29 | responsibilities:   |                     |                                                            |     |
| 30 |                     |                     |                                                            |     |
| 31 | sponsor contact     |                     |                                                            |     |
| 32 |                     |                     |                                                            |     |
| 33 | information         |                     |                                                            |     |
| 34 |                     |                     |                                                            |     |
| 35 |                     |                     |                                                            |     |
| 36 |                     |                     |                                                            |     |
| 37 |                     |                     |                                                            |     |
| 38 | Roles and           | <a href="#">#5c</a> | Role of study sponsor and funders, if any, in study        | 32  |
| 39 | responsibilities:   |                     | design; collection, management, analysis, and              |     |
| 40 |                     |                     | interpretation of data; writing of the report; and the     |     |
| 41 | sponsor and funder  |                     | decision to submit the report for publication, including   |     |
| 42 |                     |                     | whether they will have ultimate authority over any of      |     |
| 43 |                     |                     | these activities                                           |     |
| 44 |                     |                     |                                                            |     |
| 45 |                     |                     |                                                            |     |
| 46 |                     |                     |                                                            |     |
| 47 |                     |                     |                                                            |     |
| 48 |                     |                     |                                                            |     |
| 49 |                     |                     |                                                            |     |
| 50 |                     |                     |                                                            |     |
| 51 |                     |                     |                                                            |     |
| 52 | Roles and           | <a href="#">#5d</a> | Composition, roles, and responsibilities of the            | n/a |
| 53 | responsibilities:   |                     | coordinating centre, steering committee, endpoint          |     |
| 54 |                     |                     | adjudication committee, data management team, and          |     |
| 55 | committees          |                     |                                                            |     |
| 56 |                     |                     |                                                            |     |
| 57 |                     |                     |                                                            |     |
| 58 |                     |                     |                                                            |     |
| 59 |                     |                     |                                                            |     |
| 60 |                     |                     |                                                            |     |

other individuals or groups overseeing the trial, if applicable (see Item 21a for data monitoring committee)

## Introduction

|                                                 |                     |                                                                                                                                                                                                            |     |
|-------------------------------------------------|---------------------|------------------------------------------------------------------------------------------------------------------------------------------------------------------------------------------------------------|-----|
| Background and rationale                        | <a href="#">#6a</a> | Description of research question and justification for undertaking the trial, including summary of relevant studies (published and unpublished) examining benefits and harms for each intervention         | 4-7 |
| Background and rationale: choice of comparators | <a href="#">#6b</a> | Explanation for choice of comparators                                                                                                                                                                      | 4-7 |
| Objectives                                      | <a href="#">#7</a>  | Specific objectives or hypotheses                                                                                                                                                                          | 8   |
| Trial design                                    | <a href="#">#8</a>  | Description of trial design including type of trial (eg, parallel group, crossover, factorial, single group), allocation ratio, and framework (eg, superiority, equivalence, non-inferiority, exploratory) | 8-9 |
| <b>Methods:</b>                                 |                     |                                                                                                                                                                                                            |     |
| Participants, interventions, and outcomes       |                     |                                                                                                                                                                                                            |     |
| Study setting                                   | <a href="#">#9</a>  | Description of study settings (eg, community clinic, academic hospital) and list of countries where data will be collected. Reference to where list of study sites can be obtained                         | 10  |

|    |                      |                      |                                                              |       |
|----|----------------------|----------------------|--------------------------------------------------------------|-------|
| 1  | Eligibility criteria | <a href="#">#10</a>  | Inclusion and exclusion criteria for participants. If        | 11    |
| 2  |                      |                      | applicable, eligibility criteria for study centres and       |       |
| 3  |                      |                      | individuals who will perform the interventions (eg,          |       |
| 4  |                      |                      | surgeons, psychotherapists)                                  |       |
| 5  |                      |                      |                                                              |       |
| 6  |                      |                      |                                                              |       |
| 7  |                      |                      |                                                              |       |
| 8  |                      |                      |                                                              |       |
| 9  |                      |                      |                                                              |       |
| 10 |                      |                      |                                                              |       |
| 11 | Interventions:       | <a href="#">#11a</a> | Interventions for each group with sufficient detail to allow | 12-13 |
| 12 |                      |                      | replication, including how and when they will be             |       |
| 13 | description          |                      | administered                                                 |       |
| 14 |                      |                      |                                                              |       |
| 15 |                      |                      |                                                              |       |
| 16 |                      |                      |                                                              |       |
| 17 |                      |                      |                                                              |       |
| 18 |                      |                      |                                                              |       |
| 19 | Interventions:       | <a href="#">#11b</a> | Criteria for discontinuing or modifying allocated            | 19    |
| 20 |                      |                      | interventions for a given trial participant (eg, drug dose   |       |
| 21 | modifications        |                      | change in response to harms, participant request, or         |       |
| 22 |                      |                      | improving / worsening disease)                               |       |
| 23 |                      |                      |                                                              |       |
| 24 |                      |                      |                                                              |       |
| 25 |                      |                      |                                                              |       |
| 26 |                      |                      |                                                              |       |
| 27 |                      |                      |                                                              |       |
| 28 |                      |                      |                                                              |       |
| 29 | Interventions:       | <a href="#">#11c</a> | Strategies to improve adherence to intervention protocols,   | 10    |
| 30 |                      |                      | and any procedures for monitoring adherence (eg, drug        |       |
| 31 | adherence            |                      | tablet return; laboratory tests)                             |       |
| 32 |                      |                      |                                                              |       |
| 33 |                      |                      |                                                              |       |
| 34 |                      |                      |                                                              |       |
| 35 |                      |                      |                                                              |       |
| 36 | Interventions:       | <a href="#">#11d</a> | Relevant concomitant care and interventions that are         | 16-17 |
| 37 |                      |                      | permitted or prohibited during the trial                     |       |
| 38 | concomitant care     |                      |                                                              |       |
| 39 |                      |                      |                                                              |       |
| 40 |                      |                      |                                                              |       |
| 41 |                      |                      |                                                              |       |
| 42 | Outcomes             | <a href="#">#12</a>  | Primary, secondary, and other outcomes, including the        | 14-17 |
| 43 |                      |                      | specific measurement variable (eg, systolic blood            |       |
| 44 |                      |                      | pressure), analysis metric (eg, change from baseline, final  |       |
| 45 |                      |                      | value, time to event), method of aggregation (eg, median,    |       |
| 46 |                      |                      | proportion), and time point for each outcome. Explanation    |       |
| 47 |                      |                      | of the clinical relevance of chosen efficacy and harm        |       |
| 48 |                      |                      | outcomes is strongly recommended                             |       |
| 49 |                      |                      |                                                              |       |
| 50 |                      |                      |                                                              |       |
| 51 |                      |                      |                                                              |       |
| 52 |                      |                      |                                                              |       |
| 53 |                      |                      |                                                              |       |
| 54 |                      |                      |                                                              |       |
| 55 |                      |                      |                                                              |       |
| 56 |                      |                      |                                                              |       |
| 57 |                      |                      |                                                              |       |
| 58 |                      |                      |                                                              |       |
| 59 |                      |                      |                                                              |       |
| 60 |                      |                      |                                                              |       |

|    |                           |                      |                                                            |     |
|----|---------------------------|----------------------|------------------------------------------------------------|-----|
| 1  | Participant timeline      | <a href="#">#13</a>  | Time schedule of enrolment, interventions (including any   | 10  |
| 2  |                           |                      | run-ins and washouts), assessments, and visits for         |     |
| 3  |                           |                      | participants. A schematic diagram is highly recommended    |     |
| 4  |                           |                      | (see Figure)                                               |     |
| 5  |                           |                      |                                                            |     |
| 6  |                           |                      |                                                            |     |
| 7  |                           |                      |                                                            |     |
| 8  |                           |                      |                                                            |     |
| 9  |                           |                      |                                                            |     |
| 10 |                           |                      |                                                            |     |
| 11 | Sample size               | <a href="#">#14</a>  | Estimated number of participants needed to achieve         | 11  |
| 12 |                           |                      | study objectives and how it was determined, including      |     |
| 13 |                           |                      | clinical and statistical assumptions supporting any sample |     |
| 14 |                           |                      | size calculations                                          |     |
| 15 |                           |                      |                                                            |     |
| 16 |                           |                      |                                                            |     |
| 17 |                           |                      |                                                            |     |
| 18 |                           |                      |                                                            |     |
| 19 |                           |                      |                                                            |     |
| 20 |                           |                      |                                                            |     |
| 21 | Recruitment               | <a href="#">#15</a>  | Strategies for achieving adequate participant enrolment to | 10  |
| 22 |                           |                      | reach target sample size                                   |     |
| 23 |                           |                      |                                                            |     |
| 24 |                           |                      |                                                            |     |
| 25 |                           |                      |                                                            |     |
| 26 | <b>Methods:</b>           |                      |                                                            |     |
| 27 |                           |                      |                                                            |     |
| 28 | <b>Assignment of</b>      |                      |                                                            |     |
| 29 | <b>interventions (for</b> |                      |                                                            |     |
| 30 | <b>controlled trials)</b> |                      |                                                            |     |
| 31 |                           |                      |                                                            |     |
| 32 |                           |                      |                                                            |     |
| 33 |                           |                      |                                                            |     |
| 34 |                           |                      |                                                            |     |
| 35 |                           |                      |                                                            |     |
| 36 | Allocation: sequence      | <a href="#">#16a</a> | Method of generating the allocation sequence (eg,          | 8-9 |
| 37 | generation                |                      | computer-generated random numbers), and list of any        |     |
| 38 |                           |                      | factors for stratification. To reduce predictability of a  |     |
| 39 |                           |                      | random sequence, details of any planned restriction (eg,   |     |
| 40 |                           |                      | blocking) should be provided in a separate document that   |     |
| 41 |                           |                      | is unavailable to those who enrol participants or assign   |     |
| 42 |                           |                      | interventions                                              |     |
| 43 |                           |                      |                                                            |     |
| 44 |                           |                      |                                                            |     |
| 45 |                           |                      |                                                            |     |
| 46 |                           |                      |                                                            |     |
| 47 |                           |                      |                                                            |     |
| 48 |                           |                      |                                                            |     |
| 49 |                           |                      |                                                            |     |
| 50 |                           |                      |                                                            |     |
| 51 |                           |                      |                                                            |     |
| 52 |                           |                      |                                                            |     |
| 53 | Allocation                | <a href="#">#16b</a> | Mechanism of implementing the allocation sequence (eg,     | 8-9 |
| 54 | concealment               |                      | central telephone; sequentially numbered, opaque,          |     |
| 55 |                           |                      |                                                            |     |
| 56 |                           |                      |                                                            |     |
| 57 |                           |                      |                                                            |     |
| 58 | mechanism                 |                      |                                                            |     |
| 59 |                           |                      |                                                            |     |
| 60 |                           |                      |                                                            |     |

sealed envelopes), describing any steps to conceal the sequence until interventions are assigned

Allocation: [#16c](#) Who will generate the allocation sequence, who will enrol participants, and who will assign participants to interventions 9

Blinding (masking) [#17a](#) Who will be blinded after assignment to interventions (eg, trial participants, care providers, outcome assessors, data analysts), and how 9

Blinding (masking): [#17b](#) If blinded, circumstances under which unblinding is permissible, and procedure for revealing a participant's allocated intervention during the trial n/a

**Methods: Data collection, management, and analysis**

Data collection plan [#18a](#) Plans for assessment and collection of outcome, baseline, and other trial data, including any related processes to promote data quality (eg, duplicate measurements, training of assessors) and a description of study instruments (eg, questionnaires, laboratory tests) along with their reliability and validity, if known. Reference to where data collection forms can be found, if not in the protocol 14-17

|    |                            |                      |                                                                |       |
|----|----------------------------|----------------------|----------------------------------------------------------------|-------|
| 1  | Data collection plan:      | <a href="#">#18b</a> | Plans to promote participant retention and complete            | n/a   |
| 2  |                            |                      |                                                                |       |
| 3  | retention                  |                      | follow-up, including list of any outcome data to be            |       |
| 4  |                            |                      | collected for participants who discontinue or deviate from     |       |
| 5  |                            |                      | intervention protocols                                         |       |
| 6  |                            |                      |                                                                |       |
| 7  |                            |                      |                                                                |       |
| 8  |                            |                      |                                                                |       |
| 9  |                            |                      |                                                                |       |
| 10 |                            |                      |                                                                |       |
| 11 | Data management            | <a href="#">#19</a>  | Plans for data entry, coding, security, and storage,           | 19    |
| 12 |                            |                      | including any related processes to promote data quality        |       |
| 13 |                            |                      | (eg, double data entry; range checks for data values).         |       |
| 14 |                            |                      | Reference to where details of data management                  |       |
| 15 |                            |                      | procedures can be found, if not in the protocol                |       |
| 16 |                            |                      |                                                                |       |
| 17 |                            |                      |                                                                |       |
| 18 |                            |                      |                                                                |       |
| 19 |                            |                      |                                                                |       |
| 20 |                            |                      |                                                                |       |
| 21 |                            |                      |                                                                |       |
| 22 |                            |                      |                                                                |       |
| 23 | Statistics: outcomes       | <a href="#">#20a</a> | Statistical methods for analysing primary and secondary        | 17-20 |
| 24 |                            |                      | outcomes. Reference to where other details of the              |       |
| 25 |                            |                      | statistical analysis plan can be found, if not in the protocol |       |
| 26 |                            |                      |                                                                |       |
| 27 |                            |                      |                                                                |       |
| 28 |                            |                      |                                                                |       |
| 29 |                            |                      |                                                                |       |
| 30 |                            |                      |                                                                |       |
| 31 | Statistics: additional     | <a href="#">#20b</a> | Methods for any additional analyses (eg, subgroup and          | 17-20 |
| 32 | analyses                   |                      | adjusted analyses)                                             |       |
| 33 |                            |                      |                                                                |       |
| 34 |                            |                      |                                                                |       |
| 35 |                            |                      |                                                                |       |
| 36 | Statistics: analysis       | <a href="#">#20c</a> | Definition of analysis population relating to protocol non-    | 17-20 |
| 37 | population and             |                      | adherence (eg, as randomised analysis), and any                |       |
| 38 | missing data               |                      | statistical methods to handle missing data (eg, multiple       |       |
| 39 |                            |                      | imputation)                                                    |       |
| 40 |                            |                      |                                                                |       |
| 41 |                            |                      |                                                                |       |
| 42 |                            |                      |                                                                |       |
| 43 |                            |                      |                                                                |       |
| 44 |                            |                      |                                                                |       |
| 45 |                            |                      |                                                                |       |
| 46 | <b>Methods: Monitoring</b> |                      |                                                                |       |
| 47 |                            |                      |                                                                |       |
| 48 |                            |                      |                                                                |       |
| 49 | Data monitoring:           | <a href="#">#21a</a> | Composition of data monitoring committee (DMC);                | 19    |
| 50 | formal committee           |                      | summary of its role and reporting structure; statement of      |       |
| 51 |                            |                      | whether it is independent from the sponsor and                 |       |
| 52 |                            |                      | competing interests; and reference to where further            |       |
| 53 |                            |                      |                                                                |       |
| 54 |                            |                      |                                                                |       |
| 55 |                            |                      |                                                                |       |
| 56 |                            |                      |                                                                |       |
| 57 |                            |                      |                                                                |       |
| 58 |                            |                      |                                                                |       |
| 59 |                            |                      |                                                                |       |
| 60 |                            |                      |                                                                |       |



1 details about its charter can be found, if not in the  
 2  
 3 protocol. Alternatively, an explanation of why a DMC is  
 4  
 5 not needed  
 6  
 7

|    |                      |                      |                                                              |    |
|----|----------------------|----------------------|--------------------------------------------------------------|----|
| 8  | Data monitoring:     | <a href="#">#21b</a> | Description of any interim analyses and stopping             | 19 |
| 9  |                      |                      |                                                              |    |
| 10 | interim analysis     |                      | guidelines, including who will have access to these          |    |
| 11 |                      |                      |                                                              |    |
| 12 |                      |                      | interim results and make the final decision to terminate     |    |
| 13 |                      |                      |                                                              |    |
| 14 |                      |                      | the trial                                                    |    |
| 15 |                      |                      |                                                              |    |
| 16 |                      |                      |                                                              |    |
| 17 |                      |                      |                                                              |    |
| 18 | Harms                | <a href="#">#22</a>  | Plans for collecting, assessing, reporting, and managing     | 19 |
| 19 |                      |                      |                                                              |    |
| 20 |                      |                      | solicited and spontaneously reported adverse events and      |    |
| 21 |                      |                      |                                                              |    |
| 22 |                      |                      | other unintended effects of trial interventions or trial     |    |
| 23 |                      |                      |                                                              |    |
| 24 |                      |                      | conduct                                                      |    |
| 25 |                      |                      |                                                              |    |
| 26 |                      |                      |                                                              |    |
| 27 |                      |                      |                                                              |    |
| 28 | Auditing             | <a href="#">#23</a>  | Frequency and procedures for auditing trial conduct, if      | 19 |
| 29 |                      |                      |                                                              |    |
| 30 |                      |                      | any, and whether the process will be independent from        |    |
| 31 |                      |                      |                                                              |    |
| 32 |                      |                      | investigators and the sponsor                                |    |
| 33 |                      |                      |                                                              |    |
| 34 |                      |                      |                                                              |    |
| 35 | <b>Ethics and</b>    |                      |                                                              |    |
| 36 |                      |                      |                                                              |    |
| 37 | <b>dissemination</b> |                      |                                                              |    |
| 38 |                      |                      |                                                              |    |
| 39 |                      |                      |                                                              |    |
| 40 |                      |                      |                                                              |    |
| 41 | Research ethics      | <a href="#">#24</a>  | Plans for seeking research ethics committee / institutional  | 19 |
| 42 |                      |                      |                                                              |    |
| 43 | approval             |                      | review board (REC / IRB) approval                            |    |
| 44 |                      |                      |                                                              |    |
| 45 |                      |                      |                                                              |    |
| 46 | Protocol             | <a href="#">#25</a>  | Plans for communicating important protocol modifications     | 19 |
| 47 |                      |                      |                                                              |    |
| 48 | amendments           |                      | (eg, changes to eligibility criteria, outcomes, analyses) to |    |
| 49 |                      |                      |                                                              |    |
| 50 |                      |                      | relevant parties (eg, investigators, REC / IRBs, trial       |    |
| 51 |                      |                      |                                                              |    |
| 52 |                      |                      | participants, trial registries, journals, regulators)        |    |
| 53 |                      |                      |                                                              |    |
| 54 |                      |                      |                                                              |    |
| 55 |                      |                      |                                                              |    |
| 56 |                      |                      |                                                              |    |
| 57 |                      |                      |                                                              |    |
| 58 |                      |                      |                                                              |    |
| 59 |                      |                      |                                                              |    |
| 60 |                      |                      |                                                              |    |

|    |                       |                      |                                                                |       |
|----|-----------------------|----------------------|----------------------------------------------------------------|-------|
| 1  | Consent or assent     | <a href="#">#26a</a> | Who will obtain informed consent or assent from potential      | 19    |
| 2  |                       |                      | trial participants or authorised surrogates, and how (see      |       |
| 3  |                       |                      | Item 32)                                                       |       |
| 4  |                       |                      |                                                                |       |
| 5  |                       |                      |                                                                |       |
| 6  |                       |                      |                                                                |       |
| 7  |                       |                      |                                                                |       |
| 8  |                       |                      |                                                                |       |
| 9  | Consent or assent:    | <a href="#">#26b</a> | Additional consent provisions for collection and use of        | n/a   |
| 10 |                       |                      | participant data and biological specimens in ancillary         |       |
| 11 | ancillary studies     |                      | studies, if applicable                                         |       |
| 12 |                       |                      |                                                                |       |
| 13 |                       |                      |                                                                |       |
| 14 |                       |                      |                                                                |       |
| 15 |                       |                      |                                                                |       |
| 16 | Confidentiality       | <a href="#">#27</a>  | How personal information about potential and enrolled          | 19    |
| 17 |                       |                      | participants will be collected, shared, and maintained in      |       |
| 18 |                       |                      | order to protect confidentiality before, during, and after     |       |
| 19 |                       |                      | the trial                                                      |       |
| 20 |                       |                      |                                                                |       |
| 21 |                       |                      |                                                                |       |
| 22 |                       |                      |                                                                |       |
| 23 |                       |                      |                                                                |       |
| 24 |                       |                      |                                                                |       |
| 25 |                       |                      |                                                                |       |
| 26 | Declaration of        | <a href="#">#28</a>  | Financial and other competing interests for principal          | 32    |
| 27 |                       |                      | investigators for the overall trial and each study site        |       |
| 28 | interests             |                      |                                                                |       |
| 29 |                       |                      |                                                                |       |
| 30 |                       |                      |                                                                |       |
| 31 |                       |                      |                                                                |       |
| 32 | Data access           | <a href="#">#29</a>  | Statement of who will have access to the final trial           | 19    |
| 33 |                       |                      | dataset, and disclosure of contractual agreements that         |       |
| 34 |                       |                      | limit such access for investigators                            |       |
| 35 |                       |                      |                                                                |       |
| 36 |                       |                      |                                                                |       |
| 37 |                       |                      |                                                                |       |
| 38 |                       |                      |                                                                |       |
| 39 | Ancillary and post    | <a href="#">#30</a>  | Provisions, if any, for ancillary and post-trial care, and for | 19    |
| 40 |                       |                      | compensation to those who suffer harm from trial               |       |
| 41 | trial care            |                      | participation                                                  |       |
| 42 |                       |                      |                                                                |       |
| 43 |                       |                      |                                                                |       |
| 44 |                       |                      |                                                                |       |
| 45 |                       |                      |                                                                |       |
| 46 |                       |                      |                                                                |       |
| 47 | Dissemination policy: | <a href="#">#31a</a> | Plans for investigators and sponsor to communicate trial       | 19-20 |
| 48 |                       |                      | results to participants, healthcare professionals, the         |       |
| 49 | trial results         |                      | public, and other relevant groups (eg, via publication,        |       |
| 50 |                       |                      | reporting in results databases, or other data sharing          |       |
| 51 |                       |                      | arrangements), including any publication restrictions          |       |
| 52 |                       |                      |                                                                |       |
| 53 |                       |                      |                                                                |       |
| 54 |                       |                      |                                                                |       |
| 55 |                       |                      |                                                                |       |
| 56 |                       |                      |                                                                |       |
| 57 |                       |                      |                                                                |       |
| 58 |                       |                      |                                                                |       |
| 59 |                       |                      |                                                                |       |
| 60 |                       |                      |                                                                |       |

1 Dissemination policy: [#31b](#) Authorship eligibility guidelines and any intended use of n/a  
 2  
 3 authorship professional writers  
 4  
 5

6 Dissemination policy: [#31c](#) Plans, if any, for granting public access to the full n/a  
 7  
 8 reproducible protocol, participant-level dataset, and statistical code  
 9  
 10 research  
 11  
 12

## 13 Appendices

14  
 15  
 16  
 17 Informed consent [#32](#) Model consent form and other related documentation 10  
 18  
 19 materials given to participants and authorised surrogates  
 20  
 21

22  
 23 Biological specimens [#33](#) Plans for collection, laboratory evaluation, and storage of n/a  
 24  
 25 biological specimens for genetic or molecular analysis in  
 26  
 27 the current trial and for future use in ancillary studies, if  
 28  
 29 applicable  
 30  
 31

32  
 33 None The SPIRIT checklist is distributed under the terms of the Creative Commons Attribution  
 34  
 35 License CC-BY-ND 3.0. This checklist can be completed online using <https://www.goodreports.org/>, a  
 36  
 37 tool made by the [EQUATOR Network](#) in collaboration with [Penelope.ai](#)  
 38  
 39  
 40  
 41  
 42  
 43  
 44  
 45  
 46  
 47  
 48  
 49  
 50  
 51  
 52  
 53  
 54  
 55  
 56  
 57  
 58  
 59  
 60
